# Supplementary material for: Blastocyst Injection of Wild Type Embryonic Stem Cells Induces Global Corrections in Mdx Mice
Source: PLoS One. 2009 Mar 11;4(3):e4759. doi: 10.1371/journal.pone.0004759 (PMC2653195; doi:10.1371/journal.pone.0004759)
Supplement: Table S2 — Comparison of gene expression profiles between 4 month-old WT/mdx (20% of chimerism) and WT pectoralis muscles (0.33 MB XLS) [file pone.0004759.s002.xls]

## Sheet: WTmdx (20%)_vs_WT(2;0.001).txt
DF_MOE430A_WT/mdx(20%) vs wt
FC >= 2 pval <= 0.1%	Signal	Detection	Detection p-value	Signal Log Ratio	Fold Change	Change	Change p-value	Statistical p-value	Descriptions
1426438_at	789.1	P	0.00024	7.4	168.9	I	2e-05	2e-05	gb:BB667072 /DB_XREF=gi:16398521 /DB_XREF=BB667072 /CLONE=2610028H19 /FEA=FLmRNA /CNT=123 /TID=Mm.20950.1 /TIER=Stack /STK=19 /UG=Mm.20950 /LL=26900 /UG_GENE=Dby /UG_TITLE=DEAD (aspartate-glutamate-alanine-aspartate) box polypeptide, Y chromosome /FL=gb:BC021453.1
1422562_at	721.3	P	0.00024	6.3	78.79	I	2e-05	2e-05	gb:NM_019662.1 /DB_XREF=gi:9790184 /GEN=Rrad /FEA=FLmRNA /CNT=48 /TID=Mm.29467.1 /TIER=FL+Stack /STK=35 /UG=Mm.29467 /LL=56437 /DEF=Mus musculus Ras-related associated with diabetes (Rrad), mRNA. /PROD=Ras-related associated with diabetes /FL=gb:AF084466.1 gb:NM_019662.1
1417210_at	870.9	P	0.00024	5.7	51.98	I	2e-05	2e-05	gb:NM_012011.1 /DB_XREF=gi:7242147 /GEN=Eif2s3y /FEA=FLmRNA /CNT=84 /TID=Mm.20831.1 /TIER=FL+Stack /STK=53 /UG=Mm.20831 /LL=26908 /DEF=Mus musculus eukaryotic translation initiation factor 2, subunit 3, structural gene Y-linked (Eif2s3y), mRNA. /PROD=eukaryotic translation initiation factor 2,subunit 3, structural gene Y-linked /FL=gb:NM_012011.1
1452077_at	185.1	P	0.00024	5.2	36.76	I	2e-05	2e-05	gb:AA210261 /DB_XREF=gi:1808571 /DB_XREF=mu41f10.r1 /CLONE=IMAGE:641995 /FEA=FLmRNA /CNT=123 /TID=Mm.20950.1 /TIER=Stack /STK=14 /UG=Mm.20950 /LL=26900 /UG_GENE=Dby /UG_TITLE=DEAD (aspartate-glutamate-alanine-aspartate) box polypeptide, Y chromosome /FL=gb:BC021453.1
1449526_a_at	298	M	0.05615	4.2	18.38	I	0.00039	0.00039	gb:NM_024228.1 /DB_XREF=gi:13195651 /GEN=1110015E22Rik /FEA=FLmRNA /CNT=17 /TID=Mm.27893.1 /TIER=FL+Stack /STK=8 /UG=Mm.27893 /LL=68616 /DEF=Mus musculus RIKEN cDNA 1110015E22 gene (1110015E22Rik), mRNA. /PROD=RIKEN cDNA 1110015E22 /FL=gb:BC002172.1 gb:NM_024228.1
1427126_at	3588.9	P	0.00024	3.9	14.93	I	2e-05	2e-05	gb:M12573.1 /DB_XREF=gi:194018 /FEA=mRNA /CNT=23 /TID=Mm.6388.1 /TIER=Stack /STK=15 /UG=Mm.6388 /LL=15511 /UG_GENE=Hsp70-1 /UG_TITLE=heat shock protein, 70 kDa 1 /DEF=Mouse heat shock protein (hsp68) mRNA, clone MHS214, partial cds.
1460329_at	90.9	P	0.01416	3.9	14.93	I	0.00027	0.00027	gb:BG066773 /DB_XREF=gi:12549342 /DB_XREF=H3046G06-3 /CLONE=H3046G06 /FEA=FLmRNA /CNT=107 /TID=Mm.26364.1 /TIER=Stack /STK=9 /UG=Mm.26364 /LL=56386 /UG_GENE=B4galt6 /UG_TITLE=UDP-Gal:betaGlcNAc beta 1,4-galactosyltransferase, polypeptide 6 /FL=gb:BC011149.1 gb:NM_019737.1 gb:AF142674.1 gb:AF097158.1
1421811_at	46.6	A	0.06763	3.7	13	I	0.00027	0.00027	gb:AV026492 /DB_XREF=gi:4803484 /DB_XREF=AV026492 /CLONE=1210001D07 /FEA=FLmRNA /CNT=282 /TID=Mm.4159.1 /TIER=Stack /STK=163 /UG=Mm.4159 /LL=21825 /UG_GENE=Thbs1 /UG_TITLE=thrombospondin 1 /FL=gb:M87276.1 gb:NM_011580.1
1438069_a_at	35.7	A	0.12964	3.6	12.13	I	0.00035	0.00035	gb:BE446879 /DB_XREF=gi:9446487 /DB_XREF=us88g05.x1 /CLONE=IMAGE:3325496 /FEA=EST /CNT=19 /TID=Mm.46706.2 /TIER=Stack /STK=12 /UG=Mm.46706 /UG_TITLE=Mus musculus, clone IMAGE:3491703, mRNA, partial cds
1426439_at	191.8	P	0.00195	3.5	11.31	I	5e-05	5e-05	gb:AJ007376.1 /DB_XREF=gi:3790185 /GEN=dby /FEA=FLmRNA /CNT=123 /TID=Mm.20950.1 /TIER=Stack /STK=28 /UG=Mm.20950 /LL=26900 /DEF=Mus musculus mRNA for DBY RNA helicase. /PROD=DBY protein /FL=gb:BC021453.1
1427127_x_at	3659.9	P	0.00024	3.5	11.31	I	2e-05	2e-05	gb:M12573.1 /DB_XREF=gi:194018 /FEA=mRNA /CNT=23 /TID=Mm.6388.1 /TIER=Stack /STK=15 /UG=Mm.6388 /LL=15511 /UG_GENE=Hsp70-1 /UG_TITLE=heat shock protein, 70 kDa 1 /DEF=Mouse heat shock protein (hsp68) mRNA, clone MHS214, partial cds.
1420992_at	227.3	P	0.00024	3.4	10.56	I	0.00017	0.00017	gb:AK009959.1 /DB_XREF=gi:12845077 /GEN=Alrp /FEA=FLmRNA /CNT=57 /TID=Mm.10279.1 /TIER=Stack /STK=21 /UG=Mm.10279 /LL=107765 /UG_TITLE=cardiac responsive adriamycin protein /DEF=Mus musculus adult male tongue cDNA, RIKEN full-length enriched library, clone:2310057H18:ankyrin-like repeat protein, full insert sequence. /FL=gb:NM_013468.1 gb:AF041847.1
1452388_at	5046.5	P	0.00195	3.4	10.56	I	3e-05	3e-05	gb:AW763765 /DB_XREF=gi:7695708 /DB_XREF=ur65c12.x1 /CLONE=IMAGE:3155158 /FEA=mRNA /CNT=39 /TID=Mm.196559.1 /TIER=Stack /STK=10 /UG=Mm.196559 /LL=15514 /UG_GENE=Hsp70-3 /UG_TITLE=heat shock protein, 70 kDa 3
1419417_at	18.9	A	0.19458	3.2	9.19	I	0.00087	0.00087	gb:NM_009506.1 /DB_XREF=gi:6678564 /GEN=Vegfc /FEA=FLmRNA /CNT=23 /TID=Mm.1402.1 /TIER=FL+Stack /STK=10 /UG=Mm.1402 /LL=22341 /DEF=Mus musculus vascular endothelial growth factor C (Vegfc), mRNA. /PROD=vascular endothelial growth factor C /FL=gb:U58112.1 gb:NM_009506.1 gb:U73620.1
1430519_a_at	60	P	0.01856	3.2	9.19	I	5e-05	5e-05	gb:AK007767.1 /DB_XREF=gi:12841523 /GEN=Cnot7 /FEA=mRNA /CNT=3 /TID=Mm.206770.3 /TIER=ConsEnd /STK=2 /UG=Mm.206770 /LL=18983 /UG_TITLE=CCR4-NOT transcription complex, subunit 7 /DEF=Mus musculus 10 day old male pancreas cDNA, RIKEN full-length enriched library, clone:1810044B19:CCR4-NOT transcription complex, subunit 7, full insert sequence.
1437863_at	27.5	A	0.11157	3.2	9.19	I	0.00039	0.00039	gb:BB667762 /DB_XREF=gi:16399211 /DB_XREF=BB667762 /CLONE=C730038G20 /FEA=EST /CNT=51 /TID=Mm.8073.2 /TIER=Stack /STK=13 /UG=Mm.8073 /LL=12038 /UG_GENE=Bche /UG_TITLE=butyrylcholinesterase
1455899_x_at	2705.4	P	0.00024	3.2	9.19	I	3e-05	3e-05	gb:BB241535 /DB_XREF=gi:8934281 /DB_XREF=BB241535 /CLONE=A630087F01 /FEA=EST /CNT=28 /TID=Mm.3468.3 /TIER=Stack /STK=28 /UG=Mm.3468 /LL=12702 /UG_GENE=Cish3 /UG_TITLE=cytokine inducible SH2-containing protein 3
1418571_at	1496.9	A	0.14966	3.1	8.57	I	2e-05	2e-05	gb:NM_013749.1 /DB_XREF=gi:7305058 /GEN=Fn14-pending /FEA=FLmRNA /CNT=79 /TID=Mm.28518.1 /TIER=FL+Stack /STK=21 /UG=Mm.28518 /LL=27279 /DEF=Mus musculus type I transmembrane protein Fn14 (Fn14-pending), mRNA. /PROD=type I transmembrane protein Fn14 /FL=gb:AF156164.1 gb:BC025860.1 gb:NM_013749.1
1449363_at	2071.9	P	0.00024	3.1	8.57	I	2e-05	2e-05	gb:BC019946.1 /DB_XREF=gi:18044779 /FEA=FLmRNA /CNT=28 /TID=Mm.2706.1 /TIER=FL+Stack /STK=13 /UG=Mm.2706 /LL=11910 /UG_GENE=Atf3 /DEF=Mus musculus, Similar to Activating transcription factor 3, clone MGC:28295 IMAGE:4011514, mRNA, complete cds. /PROD=Similar to Activating transcription factor 3 /FL=gb:BC019946.1 gb:U19118.1 gb:D50524.1 gb:NM_007498.1
1452318_a_at	5947.9	P	0.00024	3.1	8.57	I	2e-05	2e-05	gb:M12573.1 /DB_XREF=gi:194018 /FEA=mRNA /CNT=23 /TID=Mm.6388.1 /TIER=Stack /STK=15 /UG=Mm.6388 /LL=15511 /UG_GENE=Hsp70-1 /UG_TITLE=heat shock protein, 70 kDa 1 /DEF=Mouse heat shock protein (hsp68) mRNA, clone MHS214, partial cds.
1419636_at	53	A	0.36621	2.9	7.46	I	2e-05	2e-05	gb:BG067119 /DB_XREF=gi:12549688 /DB_XREF=H3050G10-3 /CLONE=H3050G10 /FEA=FLmRNA /CNT=156 /TID=Mm.9860.1 /TIER=Stack /STK=100 /UG=Mm.9860 /LL=67392 /UG_GENE=4833420G17Rik /UG_TITLE=RIKEN cDNA 4833420G17 gene /FL=gb:NM_026127.1
1423100_at	2458.2	P	0.00073	2.9	7.46	I	2e-05	2e-05	gb:AV026617 /DB_XREF=gi:4803609 /DB_XREF=AV026617 /CLONE=1210002H07 /FEA=FLmRNA /CNT=101 /TID=Mm.5043.1 /TIER=Stack /STK=55 /UG=Mm.5043 /LL=14281 /UG_GENE=Fos /UG_TITLE=FBJ osteosarcoma oncogene /FL=gb:NM_010234.1
1427217_at	21.4	P	0.04614	2.9	7.46	I	0.00021	0.00021	gb:AV172851 /DB_XREF=gi:15404651 /DB_XREF=AV172851 /CLONE=3732412P20 /FEA=mRNA /CNT=14 /TID=Mm.82396.1 /TIER=Stack /STK=8 /UG=Mm.82396 /UG_TITLE=Mus musculus, clone IMAGE:3598192, mRNA, partial cds
1456212_x_at	1440.4	P	0.00122	2.8	6.96	I	0.00017	0.00017	gb:BB831725 /DB_XREF=gi:17009968 /DB_XREF=BB831725 /CLONE=G930018K04 /FEA=EST /CNT=15 /TID=Mm.3468.4 /TIER=Stack /STK=13 /UG=Mm.3468 /LL=12702 /UG_GENE=Cish3 /UG_TITLE=cytokine inducible SH2-containing protein 3
1415899_at	287.7	A	0.08057	2.7	6.5	I	0.00049	0.00049	gb:NM_008416.1 /DB_XREF=gi:6680511 /GEN=Junb /FEA=FLmRNA /CNT=302 /TID=Mm.1167.1 /TIER=FL+Stack /STK=177 /UG=Mm.1167 /LL=16477 /DEF=Mus musculus Jun-B oncogene (Junb), mRNA. /PROD=Jun-B oncogene /FL=gb:BC003790.1 gb:NM_008416.1 gb:J03236.1
1438389_x_at	25.5	P	0.0376	2.7	6.5	I	8e-05	8e-05	gb:BB424434 /DB_XREF=gi:9245789 /DB_XREF=BB424434 /CLONE=C530041K09 /FEA=EST /CNT=11 /TID=Mm.25316.2 /TIER=Stack /STK=11 /UG=Mm.25316 /LL=104650 /UG_GENE=AW538652 /UG_TITLE=expressed sequence AW538652
1448303_at	89.9	A	0.12964	2.6	6.06	I	0.00019	0.00019	gb:NM_053110.1 /DB_XREF=gi:16716408 /GEN=Gpnmb /FEA=FLmRNA /CNT=151 /TID=Mm.23567.1 /TIER=FL+Stack /STK=98 /UG=Mm.23567 /LL=93695 /DEF=Mus musculus glycoprotein (transmembrane) nmb (Gpnmb), mRNA. /PROD=glycoprotein (transmembrane) nmb /FL=gb:BC026375.1 gb:NM_053110.1 gb:AF322054.1
1419220_at	2566.6	P	0.00024	2.5	5.66	I	2e-05	2e-05	gb:NM_011724.1 /DB_XREF=gi:6756014 /GEN=Xin /FEA=FLmRNA /CNT=18 /TID=Mm.10117.1 /TIER=FL+Stack /STK=12 /UG=Mm.10117 /LL=22437 /DEF=Mus musculus cardiac morphogenesis (Xin), mRNA. /PROD=cardiac morphogenesis /FL=gb:AF051945.1 gb:NM_011724.1
1435690_at	165.1	P	0.0376	2.5	5.66	I	0.00011	0.00011	gb:BB476775 /DB_XREF=gi:16440214 /DB_XREF=BB476775 /CLONE=D330021F07 /FEA=EST /CNT=19 /TID=Mm.196583.2 /TIER=Stack /STK=14 /UG=Mm.196583 /UG_TITLE=Mus musculus, clone IMAGE:3485091, mRNA, partial cds
1436487_x_at	26.7	A	0.24609	2.5	5.66	I	0.00021	0.00021	gb:BB320947 /DB_XREF=gi:9029261 /DB_XREF=BB320947 /CLONE=B230396F22 /FEA=EST /CNT=9 /TID=Mm.4465.6 /TIER=Stack /STK=9 /UG=Mm.4465 /LL=30050 /UG_GENE=Fbxw2 /UG_TITLE=f-box and WD-40 domain protein 2
1456084_x_at	142.3	P	0.02393	2.5	5.66	I	0.00044	0.00044	gb:BB532202 /DB_XREF=gi:9584131 /DB_XREF=BB532202 /CLONE=E030022M17 /FEA=EST /CNT=17 /TID=Mm.41573.6 /TIER=Stack /STK=17 /UG=Mm.41573 /LL=14264 /UG_GENE=Fmod /UG_TITLE=fibromodulin
1420884_at	200.3	P	0.00073	2.4	5.28	I	7e-05	7e-05	gb:AK008863.1 /DB_XREF=gi:12843311 /FEA=FLmRNA /CNT=90 /TID=Mm.29132.1 /TIER=Stack /STK=43 /UG=Mm.29132 /LL=66402 /UG_GENE=2310045A07Rik /UG_TITLE=RIKEN cDNA 2310045A07 gene /DEF=Mus musculus adult male stomach cDNA, RIKEN full-length enriched library, clone:2210408O14:homolog to SARCOLIPIN, full insert sequence. /FL=gb:NM_025540.1
1426182_a_at	35.1	A	0.17139	2.4	5.28	I	0.00097	0.00097	gb:AF106009.1 /DB_XREF=gi:5114111 /FEA=FLmRNA /CNT=1 /TID=Mm.56899.3 /TIER=FL /STK=1 /UG=Mm.56899 /LL=16641 /UG_GENE=Klrc1 /DEF=Mus musculus natural killer cell protein group 2-A2 mRNA, complete cds. /PROD=natural killer cell protein group 2-A2 /FL=gb:AF106009.1
1419149_at	80.4	A	0.21948	2.3	4.92	I	0.00049	0.00049	gb:NM_008871.1 /DB_XREF=gi:6679372 /GEN=Serpine1 /FEA=FLmRNA /CNT=19 /TID=Mm.1263.1 /TIER=FL+Stack /STK=13 /UG=Mm.1263 /LL=18787 /DEF=Mus musculus serine (or cysteine) proteinase inhibitor, clade E (nexin, plasminogen activator inhibitor type 1), member 1 (Serpine1), mRNA. /PROD=plasminogen activator inhibitor, type I /FL=gb:M33960.1 gb:NM_008871.1
1448748_at	45.2	P	0.04614	2.3	4.92	I	0.00031	0.00031	gb:NM_019549.1 /DB_XREF=gi:11464970 /GEN=Plek /FEA=FLmRNA /CNT=79 /TID=Mm.98232.1 /TIER=FL+Stack /STK=43 /UG=Mm.98232 /LL=56193 /DEF=Mus musculus pleckstrin (Plek), mRNA. /PROD=pleckstrin /FL=gb:AF181829.1 gb:NM_019549.1 gb:AF303745.1 gb:AF073294.1
1419723_at	216.3	A	0.08057	2.2	4.59	I	0.00069	0.00069	gb:NM_008106.1 /DB_XREF=gi:6679974 /GEN=Opn1mw /FEA=FLmRNA /CNT=11 /TID=Mm.89948.1 /TIER=FL /STK=7 /UG=Mm.89948 /LL=14539 /DEF=Mus musculus opsin 1 (cone pigments), medium-wave-sensitive (color blindness, deutan) (Opn1mw), mRNA. /PROD=green cone pigment /FL=gb:AF011389.1 gb:NM_008106.1 gb:BC014826.1 gb:AF190672.1
1448553_at	7000.6	P	0.00024	2.2	4.59	I	2e-05	2e-05	gb:NM_080728.1 /DB_XREF=gi:18859640 /GEN=Myh7 /FEA=FLmRNA /CNT=120 /TID=Mm.155714.1 /TIER=FL+Stack /STK=59 /UG=Mm.155714 /LL=140781 /DEF=Mus musculus myosin, heavy polypeptide 7, cardiac muscle, beta (Myh7), mRNA. /PROD=myosin, heavy polypeptide 7, cardiac muscle,beta /FL=gb:NM_080728.1 gb:AY056464.1
1427316_s_at	42	A	0.27417	2.1	4.29	I	0.00027	0.00027	gb:BB401486 /DB_XREF=gi:16414841 /DB_XREF=BB401486 /CLONE=C330023E20 /FEA=mRNA /CNT=77 /TID=Mm.38123.1 /TIER=Stack /STK=9 /UG=Mm.38123 /UG_TITLE=Mus musculus unknown mRNA, partial cds
1455271_at	201.6	A	0.11157	2.1	4.29	I	0.00035	0.00035	gb:BB560177 /DB_XREF=gi:16449077 /DB_XREF=BB560177 /CLONE=E530011N06 /FEA=EST /CNT=30 /TID=Mm.27799.3 /TIER=Stack /STK=18 /UG=Mm.27799 /LL=66239 /UG_GENE=1500011J06Rik /UG_TITLE=RIKEN cDNA 1500011J06 gene
1426607_at	537.6	P	0.00122	2	4	I	9e-05	9e-05	gb:BB668066 /DB_XREF=gi:16399515 /DB_XREF=BB668066 /CLONE=C920013G19 /FEA=FLmRNA /CNT=35 /TID=Mm.157533.1 /TIER=Stack /STK=10 /UG=Mm.157533 /UG_TITLE=Mus musculus, Similar to hypothetical protein FLJ21657, clone MGC:29320 IMAGE:5011629, mRNA, complete cds /FL=gb:BC021422.1
1436853_a_at	545.7	P	0.00073	2	4	I	5e-05	5e-05	gb:AI324124 /DB_XREF=gi:4058553 /DB_XREF=mh26h04.x1 /CLONE=IMAGE:443671 /FEA=EST /CNT=48 /TID=Mm.17484.4 /TIER=Stack /STK=43 /UG=Mm.17484 /LL=20617 /UG_GENE=Snca /UG_TITLE=synuclein, alpha
1450344_a_at	68.6	P	0.00195	2	4	I	0.00062	0.00062	gb:NM_011196.1 /DB_XREF=gi:6755217 /GEN=Ptger3 /FEA=FLmRNA /CNT=2 /TID=Mm.30424.1 /TIER=FL /STK=2 /UG=Mm.30424 /LL=19218 /DEF=Mus musculus prostaglandin E receptor 3 (subtype EP3) (Ptger3), mRNA. /PROD=prostaglandin E receptor EP3 subtype /FL=gb:D13321.1 gb:NM_011196.1
1426063_a_at	76.3	P	0.00195	1.9	3.73	I	2e-05	2e-05	gb:U10551.1 /DB_XREF=gi:511464 /GEN=gem /FEA=FLmRNA /CNT=1 /TID=Mm.4362.2 /TIER=FL /STK=1 /UG=Mm.4362 /LL=14579 /DEF=Mus musculus Gem GTPase (gem) mRNA, complete cds. /PROD=Gem /FL=gb:U10551.1
1449641_at	46.7	P	0.01856	1.9	3.73	I	0.00097	0.00097	gb:AI508733 /DB_XREF=gi:4407638 /DB_XREF=vb41g08.y1 /CLONE=IMAGE:751550 /FEA=EST /CNT=3 /TID=Mm.37619.1 /TIER=ConsEnd /STK=0 /UG=Mm.37619 /UG_TITLE=ESTs
1417065_at	708.6	P	0.00024	1.8	3.48	I	2e-05	2e-05	gb:NM_007913.1 /DB_XREF=gi:6681284 /GEN=Egr1 /FEA=FLmRNA /CNT=130 /TID=Mm.181959.1 /TIER=FL+Stack /STK=58 /UG=Mm.181959 /LL=13653 /DEF=Mus musculus early growth response 1 (Egr1), mRNA. /PROD=early growth response 1 /FL=gb:M20157.1 gb:M22326.1 gb:NM_007913.1
1460318_at	5339.4	P	0.00024	1.8	3.48	I	2e-05	2e-05	gb:NM_013808.1 /DB_XREF=gi:7304986 /GEN=Csrp3 /FEA=FLmRNA /CNT=56 /TID=Mm.17235.1 /TIER=FL+Stack /STK=25 /UG=Mm.17235 /LL=13009 /DEF=Mus musculus cysteine-rich protein 3 (Csrp3), mRNA. /PROD=cysteine-rich protein 3 /FL=gb:NM_013808.1 gb:D88791.1
1417612_at	361.5	P	0.00024	1.7	3.25	I	2e-05	2e-05	gb:NM_010500.1 /DB_XREF=gi:6754283 /GEN=Ier5 /FEA=FLmRNA /CNT=149 /TID=Mm.12246.1 /TIER=FL+Stack /STK=40 /UG=Mm.12246 /LL=15939 /DEF=Mus musculus immediate early response 5 (Ier5), mRNA. /PROD=immediate early response 5 /FL=gb:AF079527.1 gb:NM_010500.1
1438852_x_at	41.8	P	0.00024	1.7	3.25	I	8e-05	8e-05	gb:BB099487 /DB_XREF=gi:8744521 /DB_XREF=BB099487 /CLONE=9430069A11 /FEA=EST /CNT=10 /TID=Mm.4933.4 /TIER=Stack /STK=9 /UG=Mm.4933 /LL=17219 /UG_GENE=Mcmd6 /UG_TITLE=mini chromosome maintenance deficient 6 (S. cerevisiae)
1448021_at	487.5	P	0.00293	1.7	3.25	I	2e-05	2e-05	gb:AA266723 /DB_XREF=gi:1903565 /DB_XREF=mz98f08.r1 /CLONE=IMAGE:721479 /FEA=EST /CNT=12 /TID=Mm.29940.1 /TIER=ConsEnd /STK=0 /UG=Mm.29940 /UG_TITLE=ESTs
1421915_a_at	36.6	P	0.02393	1.6	3.03	I	0.00055	0.00055	gb:NM_009176.1 /DB_XREF=gi:6677954 /GEN=Siat6 /FEA=FLmRNA /CNT=39 /TID=Mm.41978.1 /TIER=FL /STK=1 /UG=Mm.41978 /LL=20441 /DEF=Mus musculus sialyltransferase 6 (N-acetyllacosaminide alpha 2,3-sialyltransferase) (Siat6), mRNA. /PROD=sialyltransferase 6 (N-acetyllacosaminide alpha2,3-sialyltransferase) /FL=gb:NM_009176.1
1449340_at	37.7	A	0.14966	1.6	3.03	I	0.00049	0.00049	gb:AK007893.1 /DB_XREF=gi:12841739 /FEA=FLmRNA /CNT=73 /TID=Mm.43375.1 /TIER=Stack /STK=16 /UG=Mm.43375 /LL=66042 /UG_GENE=0610006G05Rik /UG_TITLE=RIKEN cDNA 0610006G05 gene /DEF=Mus musculus 10 day old male pancreas cDNA, RIKEN full-length enriched library, clone:1810057P14:homolog to HYPOTHETICAL 15.3 KDA PROTEIN (FRAGMENT), full insert sequence. /FL=gb:BC021458.1 gb:NM_025312.1
1451612_at	148.8	P	0.03027	1.6	3.03	I	0.00031	0.00031	gb:BC027262.1 /DB_XREF=gi:20072672 /FEA=FLmRNA /CNT=8 /TID=Mm.192991.1 /TIER=FL /STK=5 /UG=Mm.192991 /DEF=Mus musculus, Similar to metallothionein 1, clone MGC:27821 IMAGE:3483861, mRNA, complete cds. /PROD=Similar to metallothionein 1 /FL=gb:BC027262.1
1434025_at	151.8	P	0.00073	1.5	2.83	I	0.00011	0.00011	gb:BG069607 /DB_XREF=gi:12552176 /DB_XREF=H3078B09-3 /CLONE=H3078B09 /FEA=EST /CNT=73 /TID=Mm.30262.3 /TIER=Stack /STK=46 /UG=Mm.30262 /LL=12224 /UG_GENE=Klf5 /UG_TITLE=Kruppel-like factor 5
1438133_a_at	419	P	0.00024	1.5	2.83	I	2e-05	2e-05	gb:BM202770 /DB_XREF=gi:17757100 /DB_XREF=C0244E04-3 /CLONE=C0244E04 /FEA=EST /CNT=12 /TID=Mm.1231.2 /TIER=Stack /STK=12 /UG=Mm.1231 /LL=16007 /UG_GENE=Cyr61 /UG_TITLE=cysteine rich protein 61
1448272_at	1569	P	0.00024	1.5	2.83	I	2e-05	2e-05	gb:NM_007570.1 /DB_XREF=gi:6680813 /GEN=Btg2 /FEA=FLmRNA /CNT=229 /TID=Mm.903.1 /TIER=FL+Stack /STK=107 /UG=Mm.903 /LL=12227 /DEF=Mus musculus B-cell translocation gene 2, anti-proliferative (Btg2), mRNA. /PROD=B-cell translocation gene 2, anti-proliferative /FL=gb:NM_007570.1
1448554_s_at	3594.9	P	0.00293	1.5	2.83	I	0.00039	0.00039	gb:NM_080728.1 /DB_XREF=gi:18859640 /GEN=Myh7 /FEA=FLmRNA /CNT=120 /TID=Mm.155714.1 /TIER=FL+Stack /STK=59 /UG=Mm.155714 /LL=140781 /DEF=Mus musculus myosin, heavy polypeptide 7, cardiac muscle, beta (Myh7), mRNA. /PROD=myosin, heavy polypeptide 7, cardiac muscle,beta /FL=gb:NM_080728.1 gb:AY056464.1
1448756_at	40.3	P	0.0376	1.5	2.83	I	0.00011	0.00011	gb:NM_009114.1 /DB_XREF=gi:6677836 /GEN=S100a9 /FEA=FLmRNA /CNT=56 /TID=Mm.2128.1 /TIER=FL+Stack /STK=42 /UG=Mm.2128 /LL=20202 /DEF=Mus musculus S100 calcium binding protein A9 (calgranulin B) (S100a9), mRNA. /PROD=S100 calcium-binding protein A9 (calgranulin B) /FL=gb:M83219.1 gb:NM_009114.1
1416039_x_at	851.6	P	0.00122	1.4	2.64	I	4e-05	4e-05	gb:NM_010516.1 /DB_XREF=gi:6753593 /GEN=Cyr61 /FEA=FLmRNA /CNT=204 /TID=Mm.1231.1 /TIER=FL+Stack /STK=140 /UG=Mm.1231 /LL=16007 /DEF=Mus musculus cysteine rich protein 61 (Cyr61), mRNA. /PROD=cysteine rich protein 61 /FL=gb:M32490.1 gb:NM_010516.1
1416250_at	655.7	P	0.00024	1.4	2.64	I	2e-05	2e-05	gb:BG965405 /DB_XREF=gi:14353042 /DB_XREF=602830441F1 /CLONE=IMAGE:4984979 /FEA=FLmRNA /CNT=229 /TID=Mm.903.1 /TIER=Stack /STK=23 /UG=Mm.903 /LL=12227 /UG_GENE=Btg2 /UG_TITLE=B-cell translocation gene 2, anti-proliferative /FL=gb:NM_007570.1
1424800_at	2845.2	P	0.00073	1.4	2.64	I	2e-05	2e-05	gb:D10727.1 /DB_XREF=gi:220499 /GEN=ndpp-1 /FEA=FLmRNA /CNT=104 /TID=Mm.87759.2 /TIER=FL+Stack /STK=15 /UG=Mm.87759 /LL=13800 /DEF=Mus musculus mRNA for NDPP-1 protein, complete cds. /PROD=NDPP-1 protein /FL=gb:D10727.1
1426598_at	94.6	P	0.00073	1.4	2.64	I	8e-05	8e-05	gb:BB742957 /DB_XREF=gi:16145962 /DB_XREF=BB742957 /CLONE=F520010C19 /FEA=FLmRNA /CNT=33 /TID=Mm.20477.2 /TIER=Stack /STK=11 /UG=Mm.20477 /LL=22290 /UG_GENE=Uty /UG_TITLE=ubiquitously transcribed tetratricopeptide repeat gene, Y chromosome /FL=gb:AF057367.1
1451675_a_at	458.2	P	0.02393	1.4	2.64	I	6e-05	6e-05	gb:M63244.1 /DB_XREF=gi:1220399 /GEN=ALAS-E /FEA=FLmRNA /CNT=34 /TID=Mm.140509.2 /TIER=FL /STK=2 /UG=Mm.140509 /LL=11656 /DEF=Mus musculus amino levulinate synthase mRNA, complete cds. /PROD=mino levulinate synthase /FL=gb:M63244.1
1418572_x_at	1573.3	P	0.03027	1.3	2.46	I	0.00013	0.00013	gb:NM_013749.1 /DB_XREF=gi:7305058 /GEN=Fn14-pending /FEA=FLmRNA /CNT=79 /TID=Mm.28518.1 /TIER=FL+Stack /STK=21 /UG=Mm.28518 /LL=27279 /DEF=Mus musculus type I transmembrane protein Fn14 (Fn14-pending), mRNA. /PROD=type I transmembrane protein Fn14 /FL=gb:AF156164.1 gb:BC025860.1 gb:NM_013749.1
1425226_x_at	85.7	A	0.46606	1.3	2.46	I	0.00015	0.00015	gb:M16120.1 /DB_XREF=gi:201353 /FEA=FLmRNA /CNT=9 /TID=Mm.157012.3 /TIER=FL /STK=4 /UG=Mm.157012 /LL=21586 /UG_GENE=Tcrb-V13 /UG_TITLE=T-cell receptor beta, variable 13 /DEF=Mouse T-cell receptor insulin B-chain reactive beta chain VNDNJC, complete cds. /FL=gb:M16120.1 gb:AY029363.1
1448620_at	103	P	0.01416	1.3	2.46	I	0.00011	0.00011	gb:NM_010188.1 /DB_XREF=gi:6753833 /GEN=Fcgr3 /FEA=FLmRNA /CNT=97 /TID=Mm.22119.1 /TIER=FL+Stack /STK=53 /UG=Mm.22119 /LL=14131 /DEF=Mus musculus Fc receptor, IgG, low affinity III (Fcgr3), mRNA. /PROD=Fc receptor, IgG, low affinity III /FL=gb:AF197930.1 gb:M14215.1 gb:NM_010188.1
1415822_at	343.4	P	0.00024	1.2	2.3	I	2e-05	2e-05	gb:NM_009128.1 /DB_XREF=gi:6677862 /GEN=Scd2 /FEA=FLmRNA /CNT=525 /TID=Mm.193096.1 /TIER=FL+Stack /STK=227 /UG=Mm.193096 /LL=20250 /DEF=Mus musculus stearoyl-Coenzyme A desaturase 2 (Scd2), mRNA. /PROD=stearoyl-Coenzyme A desaturase 2 /FL=gb:NM_009128.1 gb:M26270.1
1419603_at	78.7	P	0.00024	1.2	2.3	I	0.00024	0.00024	gb:NM_008329.1 /DB_XREF=gi:6680356 /GEN=Ifi204 /FEA=FLmRNA /CNT=22 /TID=Mm.212870.1 /TIER=FL+Stack /STK=8 /UG=Mm.212870 /LL=15951 /DEF=Mus musculus interferon activated gene 204 (Ifi204), mRNA. /PROD=interferon activated gene 204 /FL=gb:BC010546.1 gb:M31419.1 gb:NM_008329.1
1424801_at	867.7	P	0.00073	1.2	2.3	I	0.00031	0.00031	gb:BQ044016 /DB_XREF=gi:19794227 /DB_XREF=UI-M-EF0-bul-c-24-0-UI.r1 /CLONE=IMAGE:5683535 /FEA=FLmRNA /CNT=104 /TID=Mm.87759.2 /TIER=Stack /STK=11 /UG=Mm.87759 /LL=13800 /UG_GENE=Enah /UG_TITLE=enabled homolog (Drosophila) /FL=gb:D10727.1
1426875_s_at	765.9	P	0.00024	1.2	2.3	I	0.00027	0.00027	gb:BM210600 /DB_XREF=gi:17767513 /DB_XREF=C0667C12-3 /CLONE=C0667C12 /FEA=mRNA /CNT=73 /TID=Mm.1364.1 /TIER=Stack /STK=46 /UG=Mm.1364 /LL=18154 /UG_GENE=Npn3 /UG_TITLE=neoplastic progression 3
1428942_at	3561.4	P	0.00024	1.2	2.3	I	0.00069	0.00069	gb:AA796766 /DB_XREF=gi:2859721 /DB_XREF=vp27c11.r1 /CLONE=IMAGE:1077908 /FEA=mRNA /CNT=34 /TID=Mm.142740.1 /TIER=Stack /STK=16 /UG=Mm.142740 /LL=17750 /UG_GENE=Mt2 /UG_TITLE=metallothionein 2
1436905_x_at	416.3	P	0.00024	1.2	2.3	I	2e-05	2e-05	gb:BB218107 /DB_XREF=gi:8883060 /DB_XREF=BB218107 /CLONE=A530047P06 /FEA=EST /CNT=37 /TID=Mm.4554.2 /TIER=Stack /STK=37 /UG=Mm.4554 /LL=16792 /UG_GENE=Laptm5 /UG_TITLE=lysosomal-associated protein transmembrane 5
1452417_x_at	107.4	P	0.00024	1.2	2.3	I	2e-05	2e-05	gb:AV057155 /DB_XREF=gi:5156902 /DB_XREF=AV057155 /CLONE=1810044K02 /FEA=mRNA /CNT=13 /TID=Mm.104747.14 /TIER=ConsEnd /STK=2 /UG=Mm.104747 /LL=16114 /UG_GENE=Igk-V28 /UG_TITLE=immunoglobulin kappa chain variable 28 (V28)
1452679_at	265.3	P	0.00024	1.2	2.3	I	2e-05	2e-05	gb:AA986082 /DB_XREF=gi:3167957 /DB_XREF=uc81d12.x1 /CLONE=IMAGE:1432055 /FEA=mRNA /CNT=201 /TID=Mm.200858.2 /TIER=Stack /STK=92 /UG=Mm.200858 /LL=73710 /UG_GENE=2410129E14Rik /UG_TITLE=RIKEN cDNA 2410129E14 gene
1455136_at	505.8	P	0.00024	1.2	2.3	I	2e-05	2e-05	gb:BQ175915 /DB_XREF=gi:20351407 /DB_XREF=UI-M-DJ2-bwf-f-18-0-UI.s1 /CLONE=UI-M-DJ2-bwf-f-18-0-UI /FEA=EST /CNT=82 /TID=Mm.193539.4 /TIER=Stack /STK=9 /UG=Mm.193539 /LL=50708 /UG_GENE=H1f2 /UG_TITLE=H1 histone family, member 2
1456094_at	43.8	P	0.04614	1.2	2.3	I	0.00097	0.00097	gb:BG063007 /DB_XREF=gi:12545658 /DB_XREF=H3003A06-3 /CLONE=H3003A06 /FEA=EST /CNT=37 /TID=Mm.4859.3 /TIER=Stack /STK=16 /UG=Mm.4859 /LL=67830 /UG_GENE=1110060F11Rik /UG_TITLE=RIKEN cDNA 1110060F11 gene
1416600_a_at	1830.7	P	0.00073	1.1	2.14	I	0.00044	0.00044	gb:AF260717.1 /DB_XREF=gi:7839596 /GEN=Dscr1 /FEA=FLmRNA /CNT=119 /TID=Mm.56.1 /TIER=FL+Stack /STK=79 /UG=Mm.56 /LL=54720 /DEF=Mus musculus Down syndrome candiate region 1 (Dscr1) mRNA, complete cds. /PROD=Down syndrome candiate region 1 /FL=gb:AF260717.1 gb:AF282255.1 gb:AF237789.1 gb:NM_019466.1
1420757_at	143.5	P	0.00073	1.1	2.14	I	3e-05	3e-05	gb:NM_008656.1 /DB_XREF=gi:6678981 /GEN=Myf5 /FEA=FLmRNA /CNT=6 /TID=Mm.4984.1 /TIER=FL /STK=3 /UG=Mm.4984 /LL=17877 /DEF=Mus musculus myogenic factor 5 (Myf5), mRNA. /PROD=myogenic factor 5 /FL=gb:NM_008656.1
1421955_a_at	1156.8	P	0.00806	1.1	2.14	I	6e-05	6e-05	gb:NM_010890.1 /DB_XREF=gi:13994148 /GEN=Nedd4a /FEA=FLmRNA /CNT=23 /TID=Mm.16553.1 /TIER=FL /STK=1 /UG=Mm.16553 /LL=17999 /DEF=Mus musculus neural precursor cell expressed, developmentally down-regulated gene 4a (Nedd4a), mRNA. /PROD=neural precursor cell expressed, developmentallydown-regulated gene 4a /FL=gb:NM_010890.1
1422908_at	493	P	0.00024	1.1	2.14	I	3e-05	3e-05	gb:NM_133690.1 /DB_XREF=gi:19526859 /GEN=1110020B02Rik /FEA=FLmRNA /CNT=22 /TID=Mm.60134.1 /TIER=FL+Stack /STK=8 /UG=Mm.60134 /LL=67821 /DEF=Mus musculus RIKEN cDNA 1110020B02 gene (1110020B02Rik), mRNA. /PROD=RIKEN cDNA 1110020B02 /FL=gb:NM_133690.1 gb:AF348325.1 gb:AF348324.1
1423110_at	438.2	P	0.01074	1.1	2.14	I	0.00035	0.00035	gb:AW545978 /DB_XREF=gi:7191445 /DB_XREF=L0002F07-3 /CLONE=L0002F07 /FEA=FLmRNA /CNT=461 /TID=Mm.4482.1 /TIER=Stack /STK=50 /UG=Mm.4482 /LL=12843 /UG_GENE=Col1a2 /UG_TITLE=procollagen, type I, alpha 2 /FL=gb:NM_007743.1 gb:BC007158.1
1437216_at	39.5	P	0.01856	1.1	2.14	I	0.00069	0.00069	gb:BB498608 /DB_XREF=gi:16442100 /DB_XREF=BB498608 /CLONE=D630015J07 /FEA=EST /CNT=52 /TID=Mm.111789.1 /TIER=Stack /STK=22 /UG=Mm.111789 /LL=103855 /UG_GENE=AI848406 /UG_TITLE=expressed sequence AI848406
1450813_a_at	2505.6	P	0.00073	1.1	2.14	I	3e-05	3e-05	gb:NM_021467.2 /DB_XREF=gi:20127151 /GEN=Tnni1 /FEA=FLmRNA /CNT=62 /TID=Mm.36900.1 /TIER=FL /STK=0 /UG=Mm.36900 /LL=21952 /DEF=Mus musculus troponin I, skeletal, slow 1 (Tnni1), mRNA. /PROD=troponin I, skeletal, slow 1 /FL=gb:NM_021467.2
1452345_at	3241.6	P	0.00122	1.1	2.14	I	5e-05	5e-05	gb:AF237628.1 /DB_XREF=gi:12656195 /FEA=mRNA /CNT=19 /TID=Mm.27616.1 /TIER=Stack /STK=11 /UG=Mm.27616 /LL=93677 /UG_GENE=Lmod2 /DEF=Mus musculus cardiac leiomodin mRNA, partial cds. /PROD=cardiac leiomodin
1452412_at	199.7	P	0.00586	1.1	2.14	I	2e-05	2e-05	gb:BB283726 /DB_XREF=gi:8984175 /DB_XREF=BB283726 /CLONE=A930103C21 /FEA=mRNA /CNT=26 /TID=Mm.6167.1 /TIER=ConsEnd /STK=3 /UG=Mm.6167 /LL=15426 /UG_GENE=Hoxc8 /UG_TITLE=homeo box C8
1455978_a_at	73.9	P	0.00024	1.1	2.14	I	2e-05	2e-05	gb:BB338441 /DB_XREF=gi:9047204 /DB_XREF=BB338441 /CLONE=B930013H05 /FEA=EST /CNT=22 /TID=Mm.3511.2 /TIER=Stack /STK=22 /UG=Mm.3511 /LL=17181 /UG_GENE=Matn2 /UG_TITLE=matrilin 2
1416529_at	455.2	P	0.00024	1	2	I	2e-05	2e-05	gb:U25633.1 /DB_XREF=gi:1628496 /GEN=TMP /FEA=FLmRNA /CNT=216 /TID=Mm.30024.1 /TIER=FL+Stack /STK=83 /UG=Mm.30024 /LL=13730 /DEF=Mus musculus tumor-associated membrane protein (TMP) mRNA, complete cds. /PROD=tumor-associated membrane protein /FL=gb:U25633.1 gb:NM_010128.1
1417462_at	32.9	P	0.00415	1	2	I	0.00069	0.00069	gb:NM_007598.1 /DB_XREF=gi:6671665 /GEN=Cap1 /FEA=FLmRNA /CNT=180 /TID=Mm.8687.1 /TIER=FL /STK=2 /UG=Mm.8687 /LL=12331 /DEF=Mus musculus adenylyl cyclase-associated CAP protein homolog 1 (S. cerevisiae, S. pombe) (Cap1), mRNA. /PROD=adenylyl cyclase-associated CAP protein, yeasthomolog 1 /FL=gb:BC005446.1 gb:BC005472.1 gb:NM_007598.1 gb:L12367.1
1418509_at	330.6	P	0.00122	1	2	I	2e-05	2e-05	gb:BC010758.1 /DB_XREF=gi:14789661 /FEA=FLmRNA /CNT=99 /TID=Mm.21454.1 /TIER=FL+Stack /STK=22 /UG=Mm.21454 /LL=12409 /UG_GENE=Cbr2 /DEF=Mus musculus, Similar to carbonyl reductase 2, clone MGC:18465 IMAGE:4219349, mRNA, complete cds. /PROD=Similar to carbonyl reductase 2 /FL=gb:NM_007621.1 gb:BC010758.1
1424596_s_at	3162.6	P	0.00024	1	2	I	2e-05	2e-05	gb:BC019124.1 /DB_XREF=gi:17512304 /FEA=FLmRNA /CNT=52 /TID=Mm.200426.1 /TIER=FL+Stack /STK=23 /UG=Mm.200426 /DEF=Mus musculus, Similar to LIM and cysteine-rich domains 1, clone MGC:29184 IMAGE:5007525, mRNA, complete cds. /PROD=Similar to LIM and cysteine-rich domains 1 /FL=gb:BC019124.1
1425305_at	27.6	A	0.46606	1	2	I	0.00035	0.00035	gb:BC027135.1 /DB_XREF=gi:20073345 /FEA=FLmRNA /CNT=12 /TID=Mm.111848.1 /TIER=FL /STK=3 /UG=Mm.111848 /DEF=Mus musculus, Similar to zinc finger protein 295, clone MGC:38832 IMAGE:5360683, mRNA, complete cds. /PROD=Similar to zinc finger protein 295 /FL=gb:BC027135.1
1437685_x_at	108.1	P	0.00293	1	2	I	0.00015	0.00015	gb:BB235530 /DB_XREF=gi:8915238 /DB_XREF=BB235530 /CLONE=A630054J10 /FEA=EST /CNT=16 /TID=Mm.41573.8 /TIER=Stack /STK=15 /UG=Mm.41573 /LL=14264 /UG_GENE=Fmod /UG_TITLE=fibromodulin
1449997_at	3671.1	P	0.00024	1	2	I	2e-05	2e-05	gb:NM_022314.1 /DB_XREF=gi:13928665 /GEN=Tpm3 /FEA=FLmRNA /CNT=4 /TID=Mm.17306.1 /TIER=FL /STK=3 /UG=Mm.17306 /LL=59069 /DEF=Mus musculus tropomyosin 3, gamma (Tpm3), mRNA. /PROD=tropomyosin 3, gamma /FL=gb:U04541.1 gb:AF317223.1 gb:NM_022314.1
1455812_x_at	71.9	P	0.00195	1	2	I	0.00024	0.00024	gb:BB530515 /DB_XREF=gi:9582444 /DB_XREF=BB530515 /CLONE=E030010H10 /FEA=EST /CNT=59 /TID=Mm.23090.3 /TIER=Stack /STK=56 /UG=Mm.23090 /LL=74207 /UG_GENE=2610528G05Rik /UG_TITLE=RIKEN cDNA 2610528G05 gene
1460231_at	167.8	P	0.00586	1	2	I	6e-05	6e-05	gb:NM_012057.1 /DB_XREF=gi:6754367 /GEN=Irf5 /FEA=FLmRNA /CNT=45 /TID=Mm.6479.1 /TIER=FL+Stack /STK=24 /UG=Mm.6479 /LL=27056 /DEF=Mus musculus interferon regulatory factor 5 (Irf5), mRNA. /PROD=interferon regulatory factor 5 /FL=gb:NM_012057.1 gb:AF028725.1
1423993_at	1027.5	P	0.00024	-1	-2	D	0.99951	0.00049	gb:BC016553.1 /DB_XREF=gi:16741471 /FEA=FLmRNA /CNT=171 /TID=Mm.29541.1 /TIER=FL+Stack /STK=68 /UG=Mm.29541 /LL=66144 /UG_GENE=1110004G16Rik /DEF=Mus musculus, clone MGC:29006 IMAGE:2812592, mRNA, complete cds. /PROD=Unknown (protein for MGC:29006) /FL=gb:BC016553.1
1448555_at	254.2	P	0.00586	-1	-2	D	0.99923	0.00077	gb:NM_028003.1 /DB_XREF=gi:13386275 /GEN=2310042P20Rik /FEA=FLmRNA /CNT=88 /TID=Mm.12255.1 /TIER=FL+Stack /STK=59 /UG=Mm.12255 /LL=71919 /DEF=Mus musculus RIKEN cDNA 2310042P20 gene (2310042P20Rik), mRNA. /PROD=RIKEN cDNA 2310042P20 /FL=gb:BC004046.1 gb:NM_028003.1
1450667_a_at	7879.5	P	0.00024	-1	-2	D	0.99945	0.00055	gb:AK012104.1 /DB_XREF=gi:12848643 /GEN=Cs /FEA=FLmRNA /CNT=427 /TID=Mm.43822.1 /TIER=Stack /STK=209 /UG=Mm.43822 /LL=12974 /UG_TITLE=citrate synthase /DEF=Mus musculus 10 days embryo whole body cDNA, RIKEN full-length enriched library, clone:2610511A05:citrate synthase, full insert sequence. /FL=gb:BC013554.1 gb:NM_026444.1 gb:AB056479.1
1455006_at	1255.9	P	0.00806	-1	-2	D	0.99956	0.00044	gb:W42220 /DB_XREF=gi:1326713 /DB_XREF=mb16a11.r1 /CLONE=IMAGE:329564 /FEA=EST /CNT=64 /TID=Mm.5265.1 /TIER=Stack /STK=29 /UG=Mm.5265 /LL=66379 /UG_GENE=2310016M24Rik /UG_TITLE=RIKEN cDNA 2310016M24 gene
AFFX-GapdhMur/M32599_5_at	9617.5	P	4e-05	-1.1	-2.14	D	0.99959	0.00041	M. musculus /GEN=gapd /DB_XREF=gb:M32599.1 /NOTE=SIF corresponding to nucleotides 90-409 of gb:M32599.1 /DEF=Mouse glyceraldehyde-3-phosphate dehydrogenase mRNA, complete cds.
AFFX-18SRNAMur/X00686_3_at	1961	P	4e-05	-1.1	-2.14	D	0.99953	0.00047	M. musculus /GEN=18S rRNA /DB_XREF=gb:X00686.1 /NOTE=SIF corresponding to nucleotides 1321-1821 of gb:X00686.1 /DEF=Mouse gene for 18S rRNA.
1415879_a_at	5360.2	P	0.00024	-1.1	-2.14	D	0.99985	0.00015	gb:BC012413.1 /DB_XREF=gi:15214575 /FEA=FLmRNA /CNT=278 /TID=Mm.14245.1 /TIER=FL+Stack /STK=187 /UG=Mm.14245 /LL=67186 /UG_GENE=Rplp2 /DEF=Mus musculus, RIKEN cDNA 2700049I22 gene, clone MGC:6693 IMAGE:3583752, mRNA, complete cds. /PROD=RIKEN cDNA 2700049I22 gene /FL=gb:BC012413.1 gb:NM_026020.1
1415880_a_at	3985.5	P	0.00024	-1.1	-2.14	D	0.99965	0.00035	gb:NM_010684.1 /DB_XREF=gi:7106338 /GEN=Lamp1 /FEA=FLmRNA /CNT=492 /TID=Mm.16716.1 /TIER=FL+Stack /STK=186 /UG=Mm.16716 /LL=16783 /DEF=Mus musculus lysosomal membrane glycoprotein 1 (Lamp1), mRNA. /PROD=lysosomal membrane glycoprotein 1 /FL=gb:NM_010684.1 gb:M32015.1 gb:M25244.1 gb:AY069968.1
1415891_at	4038.5	P	0.00806	-1.1	-2.14	D	0.99961	0.00039	gb:NM_019879.1 /DB_XREF=gi:9845298 /GEN=Suclg1 /FEA=FLmRNA /CNT=311 /TID=Mm.29845.1 /TIER=FL+Stack /STK=179 /UG=Mm.29845 /LL=56451 /DEF=Mus musculus succinate-CoA ligase, GDP-forming, alpha subunit (Suclg1), mRNA. /PROD=succinate-CoA ligase, GDP-forming, alphasubunit /FL=gb:NM_019879.1 gb:BC011087.1 gb:AF144101.2
1415942_at	3927.6	P	0.00024	-1.1	-2.14	D	0.99973	0.00027	gb:NM_052835.1 /DB_XREF=gi:16418338 /GEN=Rpl10 /FEA=FLmRNA /CNT=356 /TID=Mm.100113.1 /TIER=FL+Stack /STK=163 /UG=Mm.100113 /LL=110954 /DEF=Mus musculus ribosomal protein 10 (Rpl10), mRNA. /PROD=ribosomal protein 10 /FL=gb:BC024901.1 gb:NM_052835.1 gb:M93980.1
1415966_a_at	7110	P	0.00049	-1.1	-2.14	D	0.99991	9e-05	gb:NM_133666.1 /DB_XREF=gi:19526813 /GEN=Ndufv1 /FEA=FLmRNA /CNT=299 /TID=Mm.29842.1 /TIER=FL+Stack /STK=156 /UG=Mm.29842 /LL=17995 /DEF=Mus musculus NADH dehydrogenase flavoprotein 1 (Ndufv1), mRNA. /PROD=NADH dehydrogenase flavoprotein 1 /FL=gb:BC014818.1 gb:NM_133666.1
1415980_at	1840.9	P	0.00024	-1.1	-2.14	D	0.99961	0.00039	gb:NM_026468.1 /DB_XREF=gi:13385959 /GEN=Atp5g2 /FEA=FLmRNA /CNT=334 /TID=Mm.10314.1 /TIER=FL+Stack /STK=154 /UG=Mm.10314 /LL=67942 /DEF=Mus musculus ATP synthase, H+ transporting, mitochondrial F0 complex, subunit c (subunit 9), isoform 2 (Atp5g2), mRNA. /PROD=ATP synthase, H+ transporting, mitochondrial F0complex, subunit c (subunit 9), isoform 2 /FL=gb:NM_026468.1 gb:BC006813.1
1416056_a_at	6543.5	P	0.00024	-1.1	-2.14	D	0.99997	3e-05	gb:BC027265.1 /DB_XREF=gi:20073150 /FEA=FLmRNA /CNT=232 /TID=Mm.30084.1 /TIER=FL+Stack /STK=137 /UG=Mm.30084 /LL=104130 /UG_GENE=Np15 /DEF=Mus musculus, nuclear protein 15.6, clone MGC:27951 IMAGE:3589704, mRNA, complete cds. /PROD=nuclear protein 15.6 /FL=gb:BC027265.1 gb:NM_019435.1
1416058_s_at	11067.3	P	0.00024	-1.1	-2.14	D	0.99998	2e-05	gb:NM_020615.2 /DB_XREF=gi:13346509 /GEN=Atp5c1 /FEA=FLmRNA /CNT=343 /TID=Mm.12677.1 /TIER=FL+Stack /STK=137 /UG=Mm.12677 /LL=11949 /DEF=Mus musculus ATP synthase, H+ transporting, mitochondrial F1 complex, gamma polypeptide 1 (Atp5c1), mRNA. /PROD=ATP synthase, H+ transporting, mitochondrial F1complex, gamma polypeptide 1 /FL=gb:BC010700.1 gb:NM_020615.2 gb:D21073.1
1416074_a_at	5491.7	P	0.00024	-1.1	-2.14	D	0.99989	0.00011	gb:NM_009081.1 /DB_XREF=gi:6677778 /GEN=Rpl28 /FEA=FLmRNA /CNT=199 /TID=Mm.3111.1 /TIER=FL+Stack /STK=132 /UG=Mm.3111 /LL=19943 /DEF=Mus musculus ribosomal protein L28 (Rpl28), mRNA. /PROD=ribosomal protein L28 /FL=gb:NM_009081.1 gb:BC024395.1
1416090_at	4796.7	P	0.00024	-1.1	-2.14	D	0.99998	2e-05	gb:BC019512.1 /DB_XREF=gi:18043469 /FEA=FLmRNA /CNT=259 /TID=Mm.22676.1 /TIER=FL+Stack /STK=129 /UG=Mm.22676 /LL=68263 /UG_GENE=Pdhb /DEF=Mus musculus, pyruvate dehydrogenase (lipoamide) beta, clone MGC:28576 IMAGE:4210204, mRNA, complete cds. /PROD=pyruvate dehydrogenase (lipoamide) beta /FL=gb:BC019512.1 gb:NM_024221.1
1416101_a_at	4961.6	P	0.00024	-1.1	-2.14	D	0.99938	0.00062	gb:NM_015786.1 /DB_XREF=gi:9845256 /GEN=H1f2 /FEA=FLmRNA /CNT=188 /TID=Mm.193539.1 /TIER=FL+Stack /STK=127 /UG=Mm.193539 /LL=50708 /DEF=Mus musculus H1 histone family, member 2 (H1f2), mRNA. /PROD=H1 histone family, member 2 /FL=gb:NM_015786.1
1416141_a_at	7977	P	0.00024	-1.1	-2.14	D	0.99994	6e-05	gb:NM_009096.1 /DB_XREF=gi:6677808 /GEN=Rps6 /FEA=FLmRNA /CNT=288 /TID=Mm.1139.1 /TIER=FL+Stack /STK=121 /UG=Mm.1139 /LL=20104 /DEF=Mus musculus ribosomal protein S6 (Rps6), mRNA. /PROD=ribosomal protein S6 /FL=gb:NM_009096.1 gb:BC010604.1
1416276_a_at	6005.4	P	0.00024	-1.1	-2.14	D	0.99998	2e-05	gb:NM_009094.1 /DB_XREF=gi:6677804 /GEN=Rps4x /FEA=FLmRNA /CNT=245 /TID=Mm.66.1 /TIER=FL+Stack /STK=102 /UG=Mm.66 /LL=20102 /DEF=Mus musculus ribosomal protein S4, X-linked (Rps4x), mRNA. /PROD=ribosomal protein S4, X-linked /FL=gb:BC009100.1 gb:M73436.1 gb:NM_009094.1
1416365_at	1547.4	P	0.00024	-1.1	-2.14	D	0.99956	0.00044	gb:BI154147 /DB_XREF=gi:14614148 /DB_XREF=602902640F1 /CLONE=IMAGE:5032545 /FEA=FLmRNA /CNT=391 /TID=Mm.2180.1 /TIER=Stack /STK=11 /UG=Mm.2180 /LL=15516 /UG_GENE=Hsp84-1 /UG_TITLE=heat shock protein, 84 kDa 1 /FL=gb:NM_008302.1 gb:M18186.1
1416393_at	1057	P	0.00122	-1.1	-2.14	D	0.9999	0.0001	gb:NM_013536.1 /DB_XREF=gi:7305108 /GEN=Grcc2f /FEA=FLmRNA /CNT=185 /TID=Mm.6390.1 /TIER=FL+Stack /STK=92 /UG=Mm.6390 /LL=14791 /DEF=Mus musculus gene rich cluster, C2f gene (Grcc2f), mRNA. /PROD=gene rich cluster, C2f gene /FL=gb:NM_013536.1 gb:BC002004.1
1416478_a_at	7198	P	0.00024	-1.1	-2.14	D	0.99998	2e-05	gb:NM_008617.1 /DB_XREF=gi:6678915 /GEN=Mor1 /FEA=FLmRNA /CNT=266 /TID=Mm.21743.1 /TIER=FL+Stack /STK=86 /UG=Mm.21743 /LL=17448 /DEF=Mus musculus malate dehydrogenase, mitochondrial (Mor1), mRNA. /PROD=malate dehydrogenase, mitochondrial /FL=gb:M16229.1 gb:BC023482.1 gb:NM_008617.1
1416485_at	4821.8	P	0.00024	-1.1	-2.14	D	0.99945	0.00055	gb:NM_016897.1 /DB_XREF=gi:12025535 /GEN=Timm23 /FEA=FLmRNA /CNT=164 /TID=Mm.24565.1 /TIER=FL+Stack /STK=86 /UG=Mm.24565 /LL=53600 /DEF=Mus musculus translocase of inner mitochondrial membrane 23 homolog (yeast) (Timm23), mRNA. /PROD=translocase of inner mitochondrial membrane 23homolog (yeast) /FL=gb:NM_016897.1 gb:AB021122.1
1416546_a_at	4449.6	P	0.00024	-1.1	-2.14	D	0.99998	2e-05	gb:NM_011290.1 /DB_XREF=gi:6755353 /GEN=Rpl6 /FEA=FLmRNA /CNT=311 /TID=Mm.588.1 /TIER=FL+Stack /STK=82 /UG=Mm.588 /LL=19988 /DEF=Mus musculus ribosomal protein L6 (Rpl6), mRNA. /PROD=ribosomal protein L6 /FL=gb:NM_011290.1
1416547_at	3179.4	P	0.00122	-1.1	-2.14	D	0.99981	0.00019	gb:NM_025597.1 /DB_XREF=gi:13385053 /GEN=2700033I16Rik /FEA=FLmRNA /CNT=140 /TID=Mm.2033.1 /TIER=FL+Stack /STK=82 /UG=Mm.2033 /LL=66495 /DEF=Mus musculus RIKEN cDNA 2700033I16 gene (2700033I16Rik), mRNA. /PROD=RIKEN cDNA 2700033I16 /FL=gb:NM_025597.1
1416565_at	3720	P	0.00073	-1.1	-2.14	D	0.9999	0.0001	gb:NM_025628.1 /DB_XREF=gi:13385089 /GEN=2010000G05Rik /FEA=FLmRNA /CNT=179 /TID=Mm.400.1 /TIER=FL+Stack /STK=81 /UG=Mm.400 /LL=66542 /DEF=Mus musculus RIKEN cDNA 2010000G05 gene (2010000G05Rik), mRNA. /PROD=RIKEN cDNA 2010000G05 /FL=gb:NM_025628.1 gb:BC024343.1
1416604_at	7419.7	P	0.00024	-1.1	-2.14	D	0.99998	2e-05	gb:NM_025567.1 /DB_XREF=gi:13385005 /GEN=Cyc1 /FEA=FLmRNA /CNT=185 /TID=Mm.29196.1 /TIER=FL+Stack /STK=78 /UG=Mm.29196 /LL=66445 /DEF=Mus musculus cytochrome c-1 (Cyc1), mRNA. /PROD=cytochrome c-1 /FL=gb:BC005620.1 gb:NM_025567.1
1416624_a_at	8141.8	P	0.00024	-1.1	-2.14	D	0.99945	0.00055	gb:NM_019883.1 /DB_XREF=gi:9845264 /GEN=Uba52 /FEA=FLmRNA /CNT=167 /TID=Mm.43005.1 /TIER=FL+Stack /STK=77 /UG=Mm.43005 /LL=22186 /DEF=Mus musculus ubiquitin A-52 residue ribosomal protein fusion product 1 (Uba52), mRNA. /PROD=ubiquitin A-52 residue ribosomal protein fusionproduct 1 /FL=gb:NM_019883.1 gb:AF118402.1 gb:BC014772.1
1416699_at	2665.8	P	0.00024	-1.1	-2.14	D	0.99956	0.00044	gb:NM_026124.1 /DB_XREF=gi:13385629 /GEN=1110008F13Rik /FEA=FLmRNA /CNT=127 /TID=Mm.29264.1 /TIER=FL+Stack /STK=73 /UG=Mm.29264 /LL=67388 /DEF=Mus musculus RIKEN cDNA 1110008F13 gene (1110008F13Rik), mRNA. /PROD=RIKEN cDNA 1110008F13 /FL=gb:BC019445.1 gb:NM_026124.1
1416752_at	7275.9	P	0.00073	-1.1	-2.14	D	0.99945	0.00055	gb:NM_011918.1 /DB_XREF=gi:6756042 /GEN=Ldb3 /FEA=FLmRNA /CNT=97 /TID=Mm.29733.1 /TIER=FL+Stack /STK=71 /UG=Mm.29733 /LL=24131 /DEF=Mus musculus LIM domain binding 3 (Ldb3), mRNA. /PROD=LIM domain binding 3 /FL=gb:AF114379.2 gb:NM_011918.1
1416793_at	3552.2	P	0.00024	-1.1	-2.14	D	0.99961	0.00039	gb:BC006934.1 /DB_XREF=gi:13905269 /FEA=FLmRNA /CNT=127 /TID=Mm.24719.1 /TIER=FL+Stack /STK=69 /UG=Mm.24719 /LL=56298 /UG_GENE=Arl6ip2 /DEF=Mus musculus, clone MGC:11999 IMAGE:3602154, mRNA, complete cds. /PROD=Unknown (protein for MGC:11999) /FL=gb:BC006934.1 gb:AF133670.1 gb:NM_019717.1
1416970_a_at	7570.3	P	0.00024	-1.1	-2.14	D	0.99995	5e-05	gb:NM_009945.1 /DB_XREF=gi:6753505 /GEN=Cox7a3 /FEA=FLmRNA /CNT=157 /TID=Mm.2151.1 /TIER=FL+Stack /STK=61 /UG=Mm.2151 /LL=12866 /DEF=Mus musculus cytochrome c oxidase, subunit VIIa 3 (Cox7a3), mRNA. /PROD=cytochrome c oxidase subunit VIIa 3 /FL=gb:BC010979.1 gb:AF037371.1 gb:NM_009945.1
1417286_at	2516.9	P	0.00195	-1.1	-2.14	D	0.99931	0.00069	gb:NM_026614.1 /DB_XREF=gi:13386099 /GEN=2900002J19Rik /FEA=FLmRNA /CNT=122 /TID=Mm.27677.1 /TIER=FL+Stack /STK=49 /UG=Mm.27677 /LL=68202 /DEF=Mus musculus RIKEN cDNA 2900002J19 gene (2900002J19Rik), mRNA. /PROD=RIKEN cDNA 2900002J19 /FL=gb:NM_026614.1
1417463_a_at	1236.6	P	0.02393	-1.1	-2.14	D	0.99979	0.00021	gb:NM_025605.1 /DB_XREF=gi:13385059 /GEN=2400001E08Rik /FEA=FLmRNA /CNT=134 /TID=Mm.30003.1 /TIER=FL+Stack /STK=44 /UG=Mm.30003 /LL=66508 /DEF=Mus musculus RIKEN cDNA 2400001E08 gene (2400001E08Rik), mRNA. /PROD=RIKEN cDNA 2400001E08 /FL=gb:BC020142.1 gb:NM_025605.1
1417464_at	8311.6	P	0.00024	-1.1	-2.14	D	0.99997	3e-05	gb:NM_009394.1 /DB_XREF=gi:6678370 /GEN=Tncs /FEA=FLmRNA /CNT=106 /TID=Mm.1716.1 /TIER=FL+Stack /STK=44 /UG=Mm.1716 /LL=21925 /DEF=Mus musculus troponin C, fast skeletal (Tncs), mRNA. /PROD=troponin C, fast skeletal /FL=gb:BC024390.1 gb:NM_009394.1
1417466_at	1220.7	P	0.00024	-1.1	-2.14	D	0.99997	3e-05	gb:NM_133736.1 /DB_XREF=gi:19526933 /GEN=1110070A02Rik /FEA=FLmRNA /CNT=99 /TID=Mm.41641.1 /TIER=FL+Stack /STK=44 /UG=Mm.41641 /LL=71800 /DEF=Mus musculus RIKEN cDNA 1110070A02 gene (1110070A02Rik), mRNA. /PROD=RIKEN cDNA 1110070A02 /FL=gb:BC005656.1 gb:NM_133736.1
1417573_at	1680.8	P	0.00024	-1.1	-2.14	D	0.99923	0.00077	gb:NM_133839.1 /DB_XREF=gi:19527053 /GEN=AI314967 /FEA=FLmRNA /CNT=84 /TID=Mm.29214.1 /TIER=FL+Stack /STK=41 /UG=Mm.29214 /LL=98905 /DEF=Mus musculus expressed sequence AI314967 (AI314967), mRNA. /PROD=expressed sequence AI314967 /FL=gb:NM_133839.1 gb:BC002253.1
1417653_at	9193.3	P	0.00024	-1.1	-2.14	D	0.99994	6e-05	gb:NM_013645.1 /DB_XREF=gi:7949118 /GEN=Pva /FEA=FLmRNA /CNT=87 /TID=Mm.2766.1 /TIER=FL+Stack /STK=39 /UG=Mm.2766 /LL=19293 /DEF=Mus musculus parvalbumin (Pva), mRNA. /PROD=parvalbumin /FL=gb:NM_013645.1 gb:BC027424.1
1417762_a_at	3697.8	P	0.00122	-1.1	-2.14	D	0.99945	0.00055	gb:NM_012053.1 /DB_XREF=gi:6755357 /GEN=Rpl8 /FEA=FLmRNA /CNT=148 /TID=Mm.30066.1 /TIER=FL+Stack /STK=36 /UG=Mm.30066 /LL=26961 /DEF=Mus musculus ribosomal protein L8 (Rpl8), mRNA. /PROD=ribosomal protein L8 /FL=gb:U67771.1 gb:NM_012053.1
1418244_at	1418.6	P	0.00024	-1.1	-2.14	D	0.99981	0.00019	gb:NM_026425.1 /DB_XREF=gi:13385921 /GEN=1500004D14Rik /FEA=FLmRNA /CNT=63 /TID=Mm.41936.1 /TIER=FL+Stack /STK=27 /UG=Mm.41936 /LL=67877 /DEF=Mus musculus RIKEN cDNA 1500004D14 gene (1500004D14Rik), mRNA. /PROD=RIKEN cDNA 1500004D14 /FL=gb:NM_026425.1 gb:BC009157.1
1418622_at	2646.5	P	0.00024	-1.1	-2.14	D	0.99965	0.00035	gb:BM234596 /DB_XREF=gi:17869866 /DB_XREF=K0403A11-3 /CLONE=K0403A11 /FEA=FLmRNA /CNT=305 /TID=Mm.21905.1 /TIER=Stack /STK=8 /UG=Mm.21905 /LL=59021 /UG_GENE=Rab2 /UG_TITLE=RAB2, member RAS oncogene family /FL=gb:NM_021518.1
1418887_a_at	1263.5	P	0.00024	-1.1	-2.14	D	0.99989	0.00011	gb:NM_138598.1 /DB_XREF=gi:20070413 /GEN=D11Wsu99e /FEA=FLmRNA /CNT=114 /TID=Mm.99677.1 /TIER=FL+Stack /STK=16 /UG=Mm.99677 /LL=28081 /DEF=Mus musculus DNA segment, Chr 11, Wayne State University 99, expressed (D11Wsu99e), mRNA. /PROD=DNA segment, Chr 11, Wayne State University 99,expressed /FL=gb:NM_138598.1
1420886_a_at	785.6	P	0.00024	-1.1	-2.14	D	0.99976	0.00024	gb:NM_013842.2 /DB_XREF=gi:13775155 /GEN=Xbp1 /FEA=FLmRNA /CNT=84 /TID=Mm.22718.1 /TIER=FL /STK=2 /UG=Mm.22718 /LL=22433 /DEF=Mus musculus X-box binding protein 1 (Xbp1), mRNA. /PROD=X-box binding protein 1 /FL=gb:NM_013842.2 gb:AF027963.3
1422184_a_at	4176.7	P	0.00024	-1.1	-2.14	D	0.99998	2e-05	gb:NM_021515.1 /DB_XREF=gi:10946935 /GEN=Ak1 /FEA=FLmRNA /CNT=4 /TID=Mm.29189.1 /TIER=FL /STK=1 /UG=Mm.29189 /LL=11636 /DEF=Mus musculus adenylate kinase 1 (Ak1), mRNA. /PROD=adenylate kinase 1 /FL=gb:NM_021515.1
1422457_s_at	909.1	P	0.00024	-1.1	-2.14	D	0.99976	0.00024	gb:NM_019929.1 /DB_XREF=gi:9910555 /GEN=Smt3h1 /FEA=FLmRNA /CNT=196 /TID=Mm.24433.1 /TIER=FL+Stack /STK=96 /UG=Mm.24433 /LL=20610 /DEF=Mus musculus SMT3 (supressor of mif two, 3) homolog 1 (S. cerevisiae) (Smt3h1), mRNA. /PROD=SMT3 (supressor of mif two, 3) homolog 1 (S.cerevisiae) /FL=gb:AF063847.1 gb:NM_019929.1
1422613_a_at	5795.5	P	0.00024	-1.1	-2.14	D	0.99998	2e-05	gb:NM_013721.1 /DB_XREF=gi:7305442 /GEN=Rpl7a /FEA=FLmRNA /CNT=70 /TID=Mm.725.1 /TIER=FL+Stack /STK=26 /UG=Mm.725 /LL=27176 /DEF=Mus musculus ribosomal protein L7a (Rpl7a), mRNA. /PROD=ribosomal protein L7a /FL=gb:NM_013721.1
1422623_x_at	1894.5	P	0.00024	-1.1	-2.14	D	0.99951	0.00049	gb:NM_018860.1 /DB_XREF=gi:9256635 /GEN=Rpl41 /FEA=FLmRNA /CNT=37 /TID=Mm.13859.1 /TIER=FL+Stack /STK=25 /UG=Mm.13859 /LL=67945 /DEF=Mus musculus ribosomal protein L41 (Rpl41), mRNA. /PROD=ribosomal protein L41 /FL=gb:NM_018860.1 gb:U93862.1
1423058_at	2171	P	0.00024	-1.1	-2.14	D	0.99973	0.00027	gb:BI102231 /DB_XREF=gi:14553124 /DB_XREF=602885539F1 /CLONE=IMAGE:5040969 /FEA=FLmRNA /CNT=481 /TID=Mm.3529.1 /TIER=Stack /STK=23 /UG=Mm.3529 /LL=12343 /UG_GENE=Cappa2 /UG_TITLE=capping protein alpha 2 /FL=gb:NM_007604.1 gb:U16741.1
1423106_at	6055.9	P	0.00024	-1.1	-2.14	D	0.99938	0.00062	gb:AK011363.1 /DB_XREF=gi:12847437 /GEN=Ube2b /FEA=FLmRNA /CNT=254 /TID=Mm.1920.1 /TIER=Stack /STK=51 /UG=Mm.1920 /LL=22210 /UG_TITLE=ubiquitin-conjugating enzyme E2B, RAD6 homology (S. cerevisiae) /DEF=Mus musculus 10 days embryo whole body cDNA, RIKEN full-length enriched library, clone:2610009I04:ubiquitin-conjugating enzyme E2B (RAD6 homology), full insert sequence. /FL=gb:U57690.1 gb:NM_0094…
1423692_at	3142.6	P	0.00024	-1.1	-2.14	D	0.99991	9e-05	gb:BC012416.1 /DB_XREF=gi:15214579 /FEA=FLmRNA /CNT=250 /TID=Mm.19834.1 /TIER=FL+Stack /STK=150 /UG=Mm.19834 /LL=68375 /UG_GENE=0610033L03Rik /DEF=Mus musculus, RIKEN cDNA 0610033L03 gene, clone MGC:7941 IMAGE:3584066, mRNA, complete cds. /PROD=RIKEN cDNA 0610033L03 gene /FL=gb:BC024673.1 gb:BC012416.1
1423727_at	1477.2	P	0.00122	-1.1	-2.14	D	0.99951	0.00049	gb:AF022811.1 /DB_XREF=gi:3114215 /FEA=FLmRNA /CNT=244 /TID=Mm.3261.1 /TIER=FL+Stack /STK=136 /UG=Mm.3261 /LL=12793 /UG_GENE=Cnih /DEF=Mus musculus cornichon mRNA, complete cds. /PROD=cornichon /FL=gb:AF022811.1
1423737_at	5184.2	P	0.00024	-1.1	-2.14	D	0.99969	0.00031	gb:BC027270.1 /DB_XREF=gi:20071221 /FEA=FLmRNA /CNT=251 /TID=Mm.30113.1 /TIER=FL+Stack /STK=132 /UG=Mm.30113 /LL=68349 /UG_GENE=Ndufs3 /DEF=Mus musculus, Similar to NADH dehydrogenase (ubiquinone) Fe-S protein 3, clone MGC:27855 IMAGE:3491580, mRNA, complete cds. /PROD=Similar to NADH dehydrogenase (ubiquinone) Fe-Sprotein 3 /FL=gb:BC027270.1
1423799_at	4299.6	P	0.00024	-1.1	-2.14	D	0.99996	4e-05	gb:BI693609 /DB_XREF=gi:15656238 /DB_XREF=603342303F1 /CLONE=IMAGE:5370216 /FEA=FLmRNA /CNT=452 /TID=Mm.13886.1 /TIER=ConsEnd /STK=1 /UG=Mm.13886 /LL=20918 /UG_GENE=Sui1-rs1 /UG_TITLE=suppressor of initiator codon mutations, related sequence 1 (S. cerevisiae) /FL=gb:BC003463.1 gb:BC010791.1 gb:AF129888.1
1424000_a_at	4968.6	P	0.00024	-1.1	-2.14	D	0.99961	0.00039	gb:U93864.1 /DB_XREF=gi:1938405 /FEA=FLmRNA /CNT=144 /TID=Mm.196538.1 /TIER=FL+Stack /STK=66 /UG=Mm.196538 /LL=27207 /UG_GENE=Rps11 /DEF=Mus musculus ribosomal protein S11 mRNA, complete cds. /PROD=ribosomal protein S11 /FL=gb:U93864.1
1424168_a_at	3483.7	P	0.00073	-1.1	-2.14	D	0.99965	0.00035	gb:U10406.1 /DB_XREF=gi:500746 /FEA=FLmRNA /CNT=116 /TID=Mm.2945.2 /TIER=FL+Stack /STK=47 /UG=Mm.2945 /LL=12345 /UG_GENE=Cappb1 /DEF=Mus musculus capping protein beta-subunit isoform 1 mRNA, complete cds. /PROD=capping protein beta-subunit, isoform 1 /FL=gb:U10406.1
1424280_at	1023.9	P	0.00024	-1.1	-2.14	D	0.99931	0.00069	gb:BC018329.1 /DB_XREF=gi:17390770 /FEA=FLmRNA /CNT=102 /TID=Mm.28236.1 /TIER=FL+Stack /STK=40 /UG=Mm.28236 /LL=70380 /UG_GENE=1810018L05Rik /DEF=Mus musculus, RIKEN cDNA 1810018L05 gene, clone MGC:25548 IMAGE:3962906, mRNA, complete cds. /PROD=RIKEN cDNA 1810018L05 gene /FL=gb:BC018329.1
1424313_a_at	6014.5	P	0.00024	-1.1	-2.14	D	0.99969	0.00031	gb:BC013503.1 /DB_XREF=gi:15488720 /FEA=FLmRNA /CNT=67 /TID=Mm.28712.1 /TIER=FL+Stack /STK=38 /UG=Mm.28712 /LL=75406 /UG_GENE=1010001M04Rik /DEF=Mus musculus, RIKEN cDNA 1010001M04 gene, clone MGC:19170 IMAGE:4223916, mRNA, complete cds. /PROD=RIKEN cDNA 1010001M04 gene /FL=gb:BC013503.1
1426088_at	8697.5	P	0.00073	-1.1	-2.14	D	0.99996	4e-05	gb:BC004015.1 /DB_XREF=gi:13278405 /FEA=FLmRNA /CNT=1 /TID=MmAffx.1.17 /TIER=FL /STK=1 /NOTE=sequence(s) not in UniGene /DEF=Mus musculus, clone MGC:7593 IMAGE:3493893, mRNA, complete cds. /PROD=Unknown (protein for MGC:7593) /FL=gb:BC004015.1
1426404_a_at	1549.4	P	0.00024	-1.1	-2.14	D	0.99981	0.00019	gb:BE980444 /DB_XREF=gi:10648391 /DB_XREF=UI-M-BG2-bci-g-05-0-UI.s1 /CLONE=UI-M-BG2-bci-g-05-0-UI /FEA=FLmRNA /CNT=242 /TID=Mm.25228.2 /TIER=Stack /STK=13 /UG=Mm.25228 /LL=29864 /UG_GENE=Rnf11 /UG_TITLE=ring finger protein 11 /FL=gb:BC010299.1
1426668_at	863.5	P	0.00024	-1.1	-2.14	D	0.99976	0.00024	gb:BB117951 /DB_XREF=gi:16261908 /DB_XREF=BB117951 /CLONE=9530063O13 /FEA=mRNA /CNT=226 /TID=Mm.30023.1 /TIER=Stack /STK=134 /UG=Mm.30023 /UG_TITLE=Mus musculus, Similar to chromosome 4 open reading frame 1, clone IMAGE:4974851, mRNA, partial cds
1427262_at	270.4	P	0.00024	-1.1	-2.14	D	0.99969	0.00031	gb:L04961.1 /DB_XREF=gi:202420 /FEA=mRNA /CNT=151 /TID=Mm.4095.1 /TIER=Stack /STK=19 /UG=Mm.4095 /LL=22438 /UG_GENE=Xist /UG_TITLE=inactive X specific transcripts /DEF=Mouse nuclear-localized inactive X-specific transcript (Xist) mRNA.
1428081_at	756.3	P	0.00024	-1.1	-2.14	D	0.99993	7e-05	gb:AK007786.1 /DB_XREF=gi:12841553 /FEA=mRNA /CNT=165 /TID=Mm.22306.1 /TIER=Stack /STK=138 /UG=Mm.22306 /LL=72038 /UG_GENE=1810045K06Rik /UG_TITLE=RIKEN cDNA 1810045K06 gene /DEF=Mus musculus 10 day old male pancreas cDNA, RIKEN full-length enriched library, clone:1810045K06:unclassifiable transcript, full insert sequence.
1428322_a_at	3967.3	P	0.00024	-1.1	-2.14	D	0.9999	0.0001	gb:BI905689 /DB_XREF=gi:16168254 /DB_XREF=603166144F1 /CLONE=IMAGE:5254307 /FEA=mRNA /CNT=139 /TID=Mm.8688.1 /TIER=Stack /STK=53 /UG=Mm.8688 /LL=68342 /UG_GENE=0610011B04Rik /UG_TITLE=RIKEN cDNA 0610011B04 gene
1428526_at	597.7	P	0.00415	-1.1	-2.14	D	0.99931	0.00069	gb:AK018782.1 /DB_XREF=gi:12858675 /FEA=mRNA /CNT=90 /TID=Mm.45683.1 /TIER=Stack /STK=34 /UG=Mm.45683 /LL=78304 /UG_GENE=1500034E06Rik /UG_TITLE=RIKEN cDNA 1500034E06 gene /DEF=Mus musculus adult male cerebellum cDNA, RIKEN full-length enriched library, clone:1500034E06:Sm protein containing protein, full insert sequence.
1428530_x_at	893.7	P	0.00195	-1.1	-2.14	D	0.99931	0.00069	gb:AV206764 /DB_XREF=gi:6147617 /DB_XREF=AV206764 /CLONE=1700090E17 /FEA=mRNA /CNT=43 /TID=Mm.16775.4 /TIER=Stack /STK=34 /UG=Mm.16775 /LL=20088 /UG_GENE=Rps24 /UG_TITLE=ribosomal protein S24
1429615_at	1288.3	P	0.00195	-1.1	-2.14	D	0.99938	0.00062	gb:AW259384 /DB_XREF=gi:6632365 /DB_XREF=up27b03.x1 /CLONE=IMAGE:2655533 /FEA=mRNA /CNT=127 /TID=Mm.28324.1 /TIER=Stack /STK=12 /UG=Mm.28324 /LL=67567 /UG_GENE=9130014I08Rik /UG_TITLE=RIKEN cDNA 9130014I08 gene
1430293_a_at	712.7	P	0.00806	-1.1	-2.14	D	0.99979	0.00021	gb:AK020979.1 /DB_XREF=gi:12861728 /FEA=mRNA /CNT=18 /TID=Mm.196137.2 /TIER=ConsEnd /STK=2 /UG=Mm.196137 /LL=71766 /UG_GENE=1300006N24Rik /UG_TITLE=RIKEN cDNA 1300006N24 gene /DEF=Mus musculus adult male corpora quadrigemina cDNA, RIKEN full-length enriched library, clone:B230118G17:2Fe-2S iron-sulfur cluster binding domains containing protein, full insert sequence.
1430522_a_at	928.9	P	0.00415	-1.1	-2.14	D	0.99981	0.00019	gb:AK009266.1 /DB_XREF=gi:12843958 /GEN=Vamp5 /FEA=mRNA /CNT=3 /TID=Mm.42184.2 /TIER=ConsEnd /STK=2 /UG=Mm.42184 /LL=53620 /UG_TITLE=vesicle-associated membrane protein 5 /DEF=Mus musculus adult male tongue cDNA, RIKEN full-length enriched library, clone:2310010E11:vesicle-associated membrane protein 5, full insert sequence.
1431177_a_at	4141.7	P	0.00024	-1.1	-2.14	D	0.99945	0.00055	gb:AK002613.1 /DB_XREF=gi:12832724 /GEN=Rpl10a /FEA=mRNA /CNT=10 /TID=Mm.2424.3 /TIER=ConsEnd /STK=0 /UG=Mm.2424 /LL=19896 /UG_TITLE=ribosomal protein L10A /DEF=Mus musculus adult male kidney cDNA, RIKEN full-length enriched library, clone:0610012K10:ribosomal protein L10A, full insert sequence.
1431665_a_at	729.6	A	0.11157	-1.1	-2.14	D	0.99961	0.00039	gb:AK004190.1 /DB_XREF=gi:12835282 /GEN=Timm8b /FEA=mRNA /CNT=2 /TID=Mm.141867.3 /TIER=ConsEnd /STK=1 /UG=Mm.141867 /LL=30057 /UG_TITLE=translocase of inner mitochondrial membrane 8 homolog b (yeast) /DEF=Mus musculus 18 days embryo whole body cDNA, RIKEN full-length enriched library, clone:1110046L21:translocase of inner mitochondrial membrane 8 homolog b (yeast), full insert sequence.
1434944_at	712.5	P	0.00073	-1.1	-2.14	D	0.99938	0.00062	gb:AW108486 /DB_XREF=gi:6079286 /DB_XREF=um21h05.x1 /CLONE=IMAGE:2225241 /FEA=EST /CNT=34 /TID=Mm.6529.2 /TIER=Stack /STK=22 /UG=Mm.6529 /LL=13400 /UG_GENE=Dm15 /UG_TITLE=dystrophia myotonica kinase, B15
1435333_at	786.8	P	0.00024	-1.1	-2.14	D	0.99914	0.00087	gb:AV156568 /DB_XREF=gi:16383280 /DB_XREF=AV156568 /CLONE=3000003G13 /FEA=EST /CNT=32 /TID=Mm.28983.2 /TIER=Stack /STK=17 /UG=Mm.28983 /LL=68493 /UG_GENE=1110007M04Rik /UG_TITLE=RIKEN cDNA 1110007M04 gene
1435725_x_at	6662.1	P	0.00073	-1.1	-2.14	D	0.99923	0.00077	gb:C77643 /DB_XREF=gi:2517973 /DB_XREF=C77643 /CLONE=J0035C08 /FEA=EST /CNT=14 /TID=Mm.70127.4 /TIER=Stack /STK=14 /UG=Mm.70127 /LL=19897 /UG_GENE=Rpl12 /UG_TITLE=ribosomal protein L12
1436064_x_at	2756.9	P	0.00073	-1.1	-2.14	D	0.99945	0.00055	gb:AV004977 /DB_XREF=gi:4781827 /DB_XREF=AV004977 /CLONE=0710008A18 /FEA=EST /CNT=15 /TID=Mm.16775.7 /TIER=Stack /STK=11 /UG=Mm.16775 /LL=20088 /UG_GENE=Rps24 /UG_TITLE=ribosomal protein S24
1436688_x_at	3256.3	P	0.00073	-1.1	-2.14	D	0.99976	0.00024	gb:AV150377 /DB_XREF=gi:5355583 /DB_XREF=AV150377 /CLONE=2900005G11 /FEA=EST /CNT=8 /TID=Mm.43749.4 /TIER=Stack /STK=8 /UG=Mm.43749 /LL=67115 /UG_GENE=3100001N19Rik /UG_TITLE=RIKEN cDNA 3100001N19 gene
1436757_a_at	10007.9	P	0.00024	-1.1	-2.14	D	0.99998	2e-05	gb:AV167903 /DB_XREF=gi:5374340 /DB_XREF=AV167903 /CLONE=3110059A01 /FEA=EST /CNT=62 /TID=Mm.400.2 /TIER=Stack /STK=61 /UG=Mm.400 /LL=66542 /UG_GENE=2010000G05Rik /UG_TITLE=RIKEN cDNA 2010000G05 gene
1436924_x_at	9166.9	P	0.00024	-1.1	-2.14	D	0.99998	2e-05	gb:AV110835 /DB_XREF=gi:5264915 /DB_XREF=AV110835 /CLONE=2600014K18 /FEA=EST /CNT=37 /TID=Mm.29982.6 /TIER=Stack /STK=35 /UG=Mm.29982 /LL=114641 /UG_GENE=Rpl31 /UG_TITLE=ribosomal protein L31
1437413_x_at	7894.3	P	0.00024	-1.1	-2.14	D	0.99969	0.00031	gb:AV216244 /DB_XREF=gi:6157089 /DB_XREF=AV216244 /CLONE=2410158J15 /FEA=EST /CNT=21 /TID=Mm.154915.2 /TIER=Stack /STK=18 /UG=Mm.154915 /LL=20090 /UG_GENE=Rps29 /UG_TITLE=ribosomal protein S29
1438609_x_at	6478.9	P	0.02393	-1.1	-2.14	D	0.99938	0.00062	gb:AV007148 /DB_XREF=gi:4784135 /DB_XREF=AV007148 /CLONE=1110003C01 /FEA=EST /CNT=10 /TID=Mm.39469.3 /TIER=Stack /STK=10 /UG=Mm.39469 /LL=21953 /UG_GENE=Tnni2 /UG_TITLE=troponin I, skeletal, fast 2
1438640_x_at	9980.6	P	0.00024	-1.1	-2.14	D	0.99973	0.00027	gb:AV305101 /DB_XREF=gi:6337615 /DB_XREF=AV305101 /CLONE=5730525N05 /FEA=EST /CNT=10 /TID=Mm.188.4 /TIER=Stack /STK=10 /UG=Mm.188 /LL=18655 /UG_GENE=Pgk1 /UG_TITLE=phosphoglycerate kinase 1
1438655_a_at	3282.1	P	0.00024	-1.1	-2.14	D	0.99969	0.00031	gb:AV057789 /DB_XREF=gi:5157536 /DB_XREF=AV057789 /CLONE=1810047K07 /FEA=EST /CNT=10 /TID=Mm.140568.3 /TIER=Stack /STK=10 /UG=Mm.140568 /LL=68436 /UG_GENE=1100001I22Rik /UG_TITLE=RIKEN cDNA 1100001I22 gene
1438986_x_at	7637.8	P	0.00024	-1.1	-2.14	D	0.99983	0.00017	gb:AV064451 /DB_XREF=gi:5184279 /DB_XREF=AV064451 /CLONE=2010010N18 /FEA=EST /CNT=9 /TID=Mm.42767.10 /TIER=Stack /STK=9 /UG=Mm.42767 /LL=20068 /UG_GENE=Rps17 /UG_TITLE=ribosomal protein S17
1448153_at	7687	P	0.00024	-1.1	-2.14	D	0.99985	0.00015	gb:NM_007747.1 /DB_XREF=gi:6680985 /GEN=Cox5a /FEA=FLmRNA /CNT=352 /TID=Mm.360.1 /TIER=FL+Stack /STK=165 /UG=Mm.360 /LL=12858 /DEF=Mus musculus cytochrome c oxidase, subunit Va (Cox5a), mRNA. /PROD=cytochrome c oxidase, subunit Va /FL=gb:NM_007747.1
1448198_a_at	5255.7	P	0.00024	-1.1	-2.14	D	0.99985	0.00015	gb:NM_026061.1 /DB_XREF=gi:13385557 /GEN=2900010I05Rik /FEA=FLmRNA /CNT=247 /TID=Mm.2060.1 /TIER=FL+Stack /STK=136 /UG=Mm.2060 /LL=67264 /DEF=Mus musculus RIKEN cDNA 2900010I05 gene (2900010I05Rik), mRNA. /PROD=RIKEN cDNA 2900010I05 /FL=gb:NM_026061.1
1448542_at	1637.1	P	0.00806	-1.1	-2.14	D	0.99981	0.00019	gb:NM_025392.1 /DB_XREF=gi:13384773 /GEN=1110013J05Rik /FEA=FLmRNA /CNT=109 /TID=Mm.150686.1 /TIER=FL+Stack /STK=60 /UG=Mm.150686 /LL=66165 /DEF=Mus musculus RIKEN cDNA 1110013J05 gene (1110013J05Rik), mRNA. /PROD=RIKEN cDNA 1110013J05 /FL=gb:NM_025392.1
1448769_at	713.1	P	0.00024	-1.1	-2.14	D	0.99976	0.00024	gb:NM_016752.1 /DB_XREF=gi:7949136 /GEN=Ugalt2 /FEA=FLmRNA /CNT=162 /TID=Mm.4593.1 /TIER=FL+Stack /STK=40 /UG=Mm.4593 /LL=110172 /DEF=Mus musculus UDP-galactose translocator 2 (Ugalt2), mRNA. /PROD=UDP-galactose translocator 2 /FL=gb:NM_016752.1 gb:D87990.1 gb:BC002029.1
1448959_at	2251.4	P	0.00024	-1.1	-2.14	D	0.99976	0.00024	gb:NM_010887.1 /DB_XREF=gi:6754813 /GEN=Ndufs4 /FEA=FLmRNA /CNT=98 /TID=Mm.14442.1 /TIER=FL+Stack /STK=29 /UG=Mm.14442 /LL=17993 /DEF=Mus musculus NADH dehydrogenase (ubiquinone) Fe-S protein 4 (Ndufs4), mRNA. /PROD=NADH dehydrogenase (ubiquinone) Fe-S protein 4 /FL=gb:AF124785.1 gb:NM_010887.1 gb:BC004618.1
1449969_at	6901.2	P	0.00024	-1.1	-2.14	D	0.99931	0.00069	gb:NM_016712.1 /DB_XREF=gi:7710103 /GEN=Tmod4 /FEA=FLmRNA /CNT=8 /TID=Mm.71935.1 /TIER=FL /STK=3 /UG=Mm.71935 /LL=50874 /DEF=Mus musculus tropomodulin 4 (Tmod4), mRNA. /PROD=tropomodulin 4 /FL=gb:AF177174.1 gb:NM_016712.1
1450638_at	3815.8	P	0.00073	-1.1	-2.14	D	0.99994	6e-05	gb:AF161074.1 /DB_XREF=gi:5596625 /GEN=Tfar19 /FEA=FLmRNA /CNT=95 /TID=Mm.21650.1 /TIER=FL+Stack /STK=55 /UG=Mm.21650 /LL=56330 /DEF=Mus musculus TF-1 apoptosis related protein 19 (Tfar19) mRNA, complete cds. /PROD=TF-1 apoptosis related protein 19 /FL=gb:NM_019746.1 gb:AF161074.1
1451124_at	2973.3	P	0.00024	-1.1	-2.14	D	0.99987	0.00013	gb:BC002066.1 /DB_XREF=gi:12805214 /FEA=FLmRNA /CNT=274 /TID=Mm.5274.1 /TIER=FL+Stack /STK=104 /UG=Mm.5274 /LL=20655 /UG_GENE=Sod1 /DEF=Mus musculus, Similar to superoxide dismutase 1, soluble, clone MGC:6157 IMAGE:3496016, mRNA, complete cds. /PROD=Similar to superoxide dismutase 1, soluble /FL=gb:BC002066.1
1451172_at	2784.3	P	0.00024	-1.1	-2.14	D	0.99961	0.00039	gb:BC019544.1 /DB_XREF=gi:18043475 /FEA=FLmRNA /CNT=164 /TID=Mm.29750.1 /TIER=FL+Stack /STK=78 /UG=Mm.29750 /LL=67808 /UG_GENE=1200015A19Rik /DEF=Mus musculus, RIKEN cDNA 1200015A19 gene, clone MGC:28581 IMAGE:4211201, mRNA, complete cds. /PROD=RIKEN cDNA 1200015A19 gene /FL=gb:BC019544.1
1451203_at	10817.1	P	0.00024	-1.1	-2.14	D	0.99998	2e-05	gb:BC025172.1 /DB_XREF=gi:19263901 /FEA=FLmRNA /CNT=119 /TID=Mm.201606.1 /TIER=FL+Stack /STK=66 /UG=Mm.201606 /DEF=Mus musculus, clone MGC:36715 IMAGE:3979003, mRNA, complete cds. /PROD=Unknown (protein for MGC:36715) /FL=gb:BC025172.1
1453729_a_at	533.3	P	0.00122	-1.1	-2.14	D	0.99997	3e-05	gb:BF578245 /DB_XREF=gi:11651957 /DB_XREF=602093072F1 /CLONE=IMAGE:4207720 /FEA=mRNA /CNT=25 /TID=Mm.10474.2 /TIER=ConsEnd /STK=0 /UG=Mm.10474 /LL=67281 /UG_GENE=3110005M08Rik /UG_TITLE=RIKEN cDNA 3110005M08 gene
1454859_a_at	11012.7	P	0.00024	-1.1	-2.14	D	0.99992	8e-05	gb:AV124394 /DB_XREF=gi:5310628 /DB_XREF=AV124394 /CLONE=2700018D19 /FEA=EST /CNT=54 /TID=Mm.140380.4 /TIER=Stack /STK=40 /UG=Mm.140380 /LL=65019 /UG_GENE=Rpl23 /UG_TITLE=ribosomal protein L23
1454905_at	784.8	P	0.00024	-1.1	-2.14	D	0.99956	0.00044	gb:BM250711 /DB_XREF=gi:17885981 /DB_XREF=K0854A12-3 /CLONE=K0854A12 /FEA=EST /CNT=108 /TID=Mm.22315.1 /TIER=Stack /STK=36 /UG=Mm.22315 /LL=102394 /UG_GENE=AA409502 /UG_TITLE=expressed sequence AA409502
1455069_x_at	11035.5	P	0.00024	-1.1	-2.14	D	0.99938	0.00062	gb:BF225398 /DB_XREF=gi:11132920 /DB_XREF=uy39c02.x1 /CLONE=IMAGE:3661922 /FEA=EST /CNT=41 /TID=Mm.16228.3 /TIER=Stack /STK=26 /UG=Mm.16228 /LL=11739 /UG_GENE=Slc25a4 /UG_TITLE=solute carrier family 25 (mitochondrial carrier; adenine nucleotide translocator), member 4
1455446_x_at	1222.8	P	0.00073	-1.1	-2.14	D	0.99914	0.00087	gb:BF228057 /DB_XREF=gi:11136147 /DB_XREF=uz39b10.x1 /CLONE=IMAGE:3671419 /FEA=EST /CNT=16 /TID=Mm.28430.3 /TIER=Stack /STK=13 /UG=Mm.28430 /LL=66885 /UG_GENE=Acadsb /UG_TITLE=acyl-Coenzyme A dehydrogenase, shortbranched chain
1455821_x_at	6338.6	P	0.00024	-1.1	-2.14	D	0.99992	8e-05	gb:AV108824 /DB_XREF=gi:5256372 /DB_XREF=AV108824 /CLONE=2510048N19 /FEA=EST /CNT=53 /TID=Mm.30049.2 /TIER=Stack /STK=51 /UG=Mm.30049 /LL=12261 /UG_GENE=C1qbp /UG_TITLE=complement component 1, q subcomponent binding protein
1460008_x_at	10190.4	P	0.00195	-1.1	-2.14	D	0.99997	3e-05	gb:AV109882 /DB_XREF=gi:5263960 /DB_XREF=AV109882 /CLONE=2600005J01 /FEA=EST /CNT=10 /TID=Mm.29982.8 /TIER=Stack /STK=9 /UG=Mm.29982 /LL=114641 /UG_GENE=Rpl31 /UG_TITLE=ribosomal protein L31
1460175_at	3201.6	P	0.02393	-1.1	-2.14	D	0.99951	0.00049	gb:NM_024175.1 /DB_XREF=gi:13195603 /GEN=Rps23 /FEA=FLmRNA /CNT=197 /TID=Mm.30011.1 /TIER=FL+Stack /STK=120 /UG=Mm.30011 /LL=66475 /DEF=Mus musculus ribosomal protein S23 (Rps23), mRNA. /PROD=ribosomal protein S23 /FL=gb:NM_024175.1 gb:BC002145.1
1460201_a_at	5134.3	P	0.00073	-1.1	-2.14	D	0.99989	0.00011	gb:BC002110.1 /DB_XREF=gi:12805288 /FEA=FLmRNA /CNT=76 /TID=Mm.3428.1 /TIER=FL+Stack /STK=52 /UG=Mm.3428 /LL=68193 /UG_GENE=Rpl24 /DEF=Mus musculus, ribosomal protein L24, clone MGC:6606 IMAGE:3488279, mRNA, complete cds. /PROD=ribosomal protein L24 /FL=gb:NM_024218.1 gb:BC002110.1
AFFX-GapdhMur/M32599_M_at	11049.5	P	4e-05	-1.2	-2.3	D	1	0	M. musculus /GEN=gapd /DB_XREF=gb:M32599.1 /NOTE=SIF corresponding to nucleotides 458-812 of gb:M32599.1 /DEF=Mouse glyceraldehyde-3-phosphate dehydrogenase mRNA, complete cds.
AFFX-GapdhMur/M32599_3_at	9551.4	P	4e-05	-1.2	-2.3	D	1	0	M. musculus /GEN=gapd /DB_XREF=gb:M32599.1 /NOTE=SIF corresponding to nucleotides 841-1153 of gb:M32599.1 /DEF=Mouse glyceraldehyde-3-phosphate dehydrogenase mRNA, complete cds.
1415716_a_at	3246.5	P	0.00024	-1.2	-2.3	D	0.99923	0.00077	gb:AA208652 /DB_XREF=gi:1805201 /DB_XREF=mv86e12.r1 /CLONE=IMAGE:661966 /FEA=mRNA /CNT=200 /TID=Mm.29911.1 /TIER=Stack /STK=120 /UG=Mm.29911 /LL=69272 /UG_GENE=3200001M24Rik /UG_TITLE=RIKEN cDNA 3200001M24 gene
1416023_at	3362.6	P	0.00024	-1.2	-2.3	D	0.99983	0.00017	gb:NM_010174.1 /DB_XREF=gi:6753809 /GEN=Fabp3 /FEA=FLmRNA /CNT=232 /TID=Mm.22220.1 /TIER=FL+Stack /STK=143 /UG=Mm.22220 /LL=14077 /DEF=Mus musculus fatty acid binding protein 3, muscle and heart (Fabp3), mRNA. /PROD=fatty acid binding protein heart 1 /FL=gb:U02883.1 gb:BC002082.1 gb:NM_010174.1
1416026_a_at	1536.3	P	0.00073	-1.2	-2.3	D	0.99997	3e-05	gb:NM_009076.1 /DB_XREF=gi:6677768 /GEN=Rpl12 /FEA=FLmRNA /CNT=205 /TID=Mm.70127.1 /TIER=FL+Stack /STK=142 /UG=Mm.70127 /LL=19897 /DEF=Mus musculus ribosomal protein L12 (Rpl12), mRNA. /PROD=ribosomal protein L12 /FL=gb:NM_009076.1 gb:L04280.1 gb:BC018321.1
1416034_at	1558.6	P	0.00024	-1.2	-2.3	D	0.99995	5e-05	gb:BF123439 /DB_XREF=gi:10962479 /DB_XREF=601760641F1 /CLONE=IMAGE:4023467 /FEA=FLmRNA /CNT=468 /TID=Mm.6417.1 /TIER=Stack /STK=33 /UG=Mm.6417 /LL=12484 /UG_GENE=Cd24a /UG_TITLE=CD24a antigen /FL=gb:NM_009846.1 gb:M58661.1
1416054_at	4803	P	0.00024	-1.2	-2.3	D	0.99973	0.00027	gb:NM_009095.1 /DB_XREF=gi:6677806 /GEN=Rps5 /FEA=FLmRNA /CNT=359 /TID=Mm.5291.1 /TIER=FL+Stack /STK=137 /UG=Mm.5291 /LL=20103 /DEF=Mus musculus ribosomal protein S5 (Rps5), mRNA. /PROD=ribosomal protein S5 /FL=gb:NM_009095.1 gb:U78085.1
1416057_at	4355.6	P	0.00024	-1.2	-2.3	D	0.99995	5e-05	gb:BC027265.1 /DB_XREF=gi:20073150 /FEA=FLmRNA /CNT=232 /TID=Mm.30084.1 /TIER=FL+Stack /STK=137 /UG=Mm.30084 /LL=104130 /UG_GENE=Np15 /DEF=Mus musculus, nuclear protein 15.6, clone MGC:27951 IMAGE:3589704, mRNA, complete cds. /PROD=nuclear protein 15.6 /FL=gb:BC027265.1 gb:NM_019435.1
1416114_at	1034.9	P	0.00195	-1.2	-2.3	D	0.99938	0.00062	gb:NM_010097.1 /DB_XREF=gi:6753707 /GEN=Sparcl1 /FEA=FLmRNA /CNT=271 /TID=Mm.29027.1 /TIER=FL+Stack /STK=125 /UG=Mm.29027 /LL=13602 /DEF=Mus musculus SPARC-like 1 (mast9, hevin) (Sparcl1), mRNA. /PROD=extracellular matrix protein 2 /FL=gb:BC003759.1 gb:U64827.1 gb:U77330.1 gb:NM_010097.1
1416245_at	1111.9	P	0.00073	-1.2	-2.3	D	0.99992	8e-05	gb:NM_025338.1 /DB_XREF=gi:13384705 /GEN=0610033H09Rik /FEA=FLmRNA /CNT=182 /TID=Mm.28999.1 /TIER=FL+Stack /STK=107 /UG=Mm.28999 /LL=66077 /DEF=Mus musculus RIKEN cDNA 0610033H09 gene (0610033H09Rik), mRNA. /PROD=RIKEN cDNA 0610033H09 /FL=gb:NM_025338.1 gb:BC011245.1
1416278_a_at	5374.8	P	0.00024	-1.2	-2.3	D	0.99981	0.00019	gb:NM_138597.1 /DB_XREF=gi:20070411 /GEN=Atp5o /FEA=FLmRNA /CNT=206 /TID=Mm.41.1 /TIER=FL+Stack /STK=102 /UG=Mm.41 /LL=28080 /DEF=Mus musculus ATP synthase, H+ transporting, mitochondrial F1 complex, O subunit (Atp5o), mRNA. /PROD=ATP synthase, H+ transporting, mitochondrial F1complex, O subunit /FL=gb:BC012241.1 gb:NM_138597.1
1416285_at	2096.1	P	0.00293	-1.2	-2.3	D	0.99993	7e-05	gb:NM_025523.1 /DB_XREF=gi:13384945 /GEN=Ndufc1 /FEA=FLmRNA /CNT=149 /TID=Mm.666.1 /TIER=FL+Stack /STK=101 /UG=Mm.666 /LL=66377 /DEF=Mus musculus NADH dehydrogenase (ubiquinone) 1, subcomplex unknown, 1 (Ndufc1), mRNA. /PROD=RIKEN cDNA 2310016K22 /FL=gb:NM_025523.1
1416300_a_at	11380.8	P	0.00024	-1.2	-2.3	D	0.99985	0.00015	gb:NM_133668.1 /DB_XREF=gi:19526817 /GEN=Slc25a3 /FEA=FLmRNA /CNT=341 /TID=Mm.298.1 /TIER=FL+Stack /STK=100 /UG=Mm.298 /LL=18674 /DEF=Mus musculus solute carrier family 25 (mitochondrial carrier; adenine nucleotide translocator), member 3 (Slc25a3), mRNA. /PROD=solute carrier family 25 (mitochondrial carrier;adenine nucleotide translocator), member 3 /FL=gb:NM_133668.1 gb:BC018161.1
1416327_at	1438.9	P	0.00195	-1.2	-2.3	D	0.99914	0.00087	gb:NM_025388.1 /DB_XREF=gi:13384767 /GEN=1110021H02Rik /FEA=FLmRNA /CNT=182 /TID=Mm.2815.1 /TIER=FL+Stack /STK=97 /UG=Mm.2815 /LL=66155 /DEF=Mus musculus RIKEN cDNA 1110021H02 gene (1110021H02Rik), mRNA. /PROD=RIKEN cDNA 1110021H02 /FL=gb:NM_025388.1 gb:BC021936.1
1416415_a_at	2216.6	P	0.00024	-1.2	-2.3	D	0.99996	4e-05	gb:AY074806.1 /DB_XREF=gi:18535650 /FEA=FLmRNA /CNT=245 /TID=Mm.916.1 /TIER=FL+Stack /STK=90 /UG=Mm.916 /LL=51788 /UG_GENE=H2afz /DEF=Mus musculus histone H2A.Z mRNA, complete cds. /PROD=histone H2A.Z /FL=gb:U70494.1 gb:NM_016750.1 gb:AY074806.1
1416420_a_at	6227.1	P	0.00024	-1.2	-2.3	D	0.99991	9e-05	gb:NM_011292.1 /DB_XREF=gi:14149646 /GEN=Rpl9 /FEA=FLmRNA /CNT=141 /TID=Mm.14244.1 /TIER=FL+Stack /STK=90 /UG=Mm.14244 /LL=20005 /DEF=Mus musculus ribosomal protein L9 (Rpl9), mRNA. /PROD=ribosomal protein L9 /FL=gb:BC013165.1 gb:AF260271.1 gb:NM_011292.1
1416519_at	2333.7	P	0.00073	-1.2	-2.3	D	0.99973	0.00027	gb:NM_018730.1 /DB_XREF=gi:9055321 /GEN=Rpl36 /FEA=FLmRNA /CNT=174 /TID=Mm.11376.1 /TIER=FL+Stack /STK=83 /UG=Mm.11376 /LL=54217 /DEF=Mus musculus ribosomal protein L36 (Rpl36), mRNA. /PROD=ribosomal protein L36 /FL=gb:NM_018730.1 gb:BC021595.1
1416526_a_at	6413.8	P	0.00024	-1.2	-2.3	D	0.99981	0.00019	gb:BC002187.1 /DB_XREF=gi:12805428 /FEA=FLmRNA /CNT=158 /TID=Mm.2507.1 /TIER=FL+Stack /STK=83 /UG=Mm.2507 /LL=57320 /UG_GENE=Dj1-pending /DEF=Mus musculus, Similar to DJ-1 protein, clone MGC:7381 IMAGE:3487763, mRNA, complete cds. /PROD=Similar to DJ-1 protein /FL=gb:AB015652.1 gb:NM_020569.1 gb:BC002187.1
1416566_at	854.2	P	0.00024	-1.2	-2.3	D	0.99938	0.00062	gb:NM_011499.1 /DB_XREF=gi:6755681 /GEN=Strap /FEA=FLmRNA /CNT=294 /TID=Mm.22584.1 /TIER=FL+Stack /STK=81 /UG=Mm.22584 /LL=20901 /DEF=Mus musculus serinethreonine kinase receptor associated protein (Strap), mRNA. /PROD=serinethreonine kinase receptor associatedprotein /FL=gb:NM_011499.1 gb:AF096285.1
1416578_at	668.9	P	0.00024	-1.2	-2.3	D	0.99923	0.00077	gb:BC027396.1 /DB_XREF=gi:20072075 /FEA=FLmRNA /CNT=242 /TID=Mm.29405.1 /TIER=FL+Stack /STK=44 /UG=Mm.29405 /LL=56438 /UG_GENE=Rbx1 /DEF=Mus musculus, ring-box 1, clone MGC:35907 IMAGE:4952242, mRNA, complete cds. /PROD=ring-box 1 /FL=gb:BC027396.1 gb:AF140599.1 gb:NM_019712.1
1416728_at	830.4	A	0.17139	-1.2	-2.3	D	0.99989	0.00011	gb:NM_009975.1 /DB_XREF=gi:7106276 /GEN=Csnk2b /FEA=FLmRNA /CNT=127 /TID=Mm.26789.1 /TIER=FL+Stack /STK=71 /UG=Mm.26789 /LL=13001 /DEF=Mus musculus casein kinase II, beta subunit (Csnk2b), mRNA. /PROD=casein kinase II, beta subunit /FL=gb:BC003775.1 gb:NM_009975.1
1416765_s_at	2583.4	P	0.00073	-1.2	-2.3	D	0.99991	9e-05	gb:NM_025571.1 /DB_XREF=gi:13385011 /GEN=2010110I09Rik /FEA=FLmRNA /CNT=108 /TID=Mm.27964.1 /TIER=FL+Stack /STK=70 /UG=Mm.27964 /LL=66449 /DEF=Mus musculus RIKEN cDNA 2010110I09 gene (2010110I09Rik), mRNA. /PROD=mitochondria associated granulocyte macrophageCSF signaling molecule /FL=gb:AF349454.1 gb:NM_025571.1 gb:BC024346.1
1416816_at	2148.7	P	0.00415	-1.2	-2.3	D	0.99979	0.00021	gb:BQ175300 /DB_XREF=gi:20350792 /DB_XREF=UI-M-DJ2-bwc-o-04-0-UI.s1 /CLONE=UI-M-DJ2-bwc-o-04-0-UI /FEA=FLmRNA /CNT=196 /TID=Mm.143817.1 /TIER=Stack /STK=18 /UG=Mm.143817 /LL=59125 /UG_GENE=Nek7 /UG_TITLE=NIMA (never in mitosis gene a)-related expressed kinase 7 /FL=gb:NM_021605.1 gb:AF217650.1
1416889_at	11835.9	P	0.00024	-1.2	-2.3	D	0.99991	9e-05	gb:NM_009405.1 /DB_XREF=gi:6678390 /GEN=Tnni2 /FEA=FLmRNA /CNT=87 /TID=Mm.39469.1 /TIER=FL+Stack /STK=65 /UG=Mm.39469 /LL=21953 /DEF=Mus musculus troponin I, skeletal, fast 2 (Tnni2), mRNA. /PROD=troponin I, skeletal, fast 2 /FL=gb:NM_009405.1 gb:J04992.1
1416921_x_at	10334.2	P	0.00024	-1.2	-2.3	D	0.99973	0.00027	gb:NM_007438.1 /DB_XREF=gi:6671538 /GEN=Aldo1 /FEA=FLmRNA /CNT=265 /TID=Mm.16763.1 /TIER=FL+Stack /STK=63 /UG=Mm.16763 /LL=11674 /DEF=Mus musculus aldolase 1, A isoform (Aldo1), mRNA. /PROD=aldolase 1, A isoform /FL=gb:NM_007438.1
1416971_at	3325.2	P	0.00024	-1.2	-2.3	D	0.99981	0.00019	gb:NM_009945.1 /DB_XREF=gi:6753505 /GEN=Cox7a3 /FEA=FLmRNA /CNT=157 /TID=Mm.2151.1 /TIER=FL+Stack /STK=61 /UG=Mm.2151 /LL=12866 /DEF=Mus musculus cytochrome c oxidase, subunit VIIa 3 (Cox7a3), mRNA. /PROD=cytochrome c oxidase subunit VIIa 3 /FL=gb:BC010979.1 gb:AF037371.1 gb:NM_009945.1
1417002_at	1175.1	P	0.01856	-1.2	-2.3	D	0.99903	0.00097	gb:BC021536.1 /DB_XREF=gi:18204854 /FEA=FLmRNA /CNT=112 /TID=Mm.41683.1 /TIER=FL+Stack /STK=60 /UG=Mm.41683 /LL=106264 /UG_GENE=0610012G03Rik /DEF=Mus musculus, Similar to RIKEN cDNA 0610012G03 gene, clone MGC:35773 IMAGE:5352549, mRNA, complete cds. /PROD=Similar to RIKEN cDNA 0610012G03 gene /FL=gb:BC021536.1 gb:NM_025320.1
1417080_a_at	582.1	P	0.00073	-1.2	-2.3	D	0.99998	2e-05	gb:NM_012029.1 /DB_XREF=gi:6755521 /GEN=Sitpec-pending /FEA=FLmRNA /CNT=66 /TID=Mm.29790.1 /TIER=FL+Stack /STK=58 /UG=Mm.29790 /LL=26940 /DEF=Mus musculus signaling intermediate in Toll pathway-evolutionarily conserved (Sitpec-pending), mRNA. /PROD=signaling intermediate in Tollpathway-evolutionarily conserved /FL=gb:AF182510.1 gb:NM_012029.1
1417245_at	570.9	P	0.00195	-1.2	-2.3	D	0.9999	0.0001	gb:NM_021434.1 /DB_XREF=gi:10946801 /GEN=AB041545 /FEA=FLmRNA /CNT=81 /TID=Mm.142760.1 /TIER=FL+Stack /STK=51 /UG=Mm.142760 /LL=58245 /DEF=Mus musculus hypothetical protein, MNCb-3029 (AB041545), mRNA. /PROD=hypothetical protein, MNCb-3029 /FL=gb:NM_021434.1
1417259_a_at	1378.1	P	0.00195	-1.2	-2.3	D	0.99923	0.00077	gb:NM_009798.1 /DB_XREF=gi:6753261 /GEN=Cappb1 /FEA=FLmRNA /CNT=212 /TID=Mm.2945.1 /TIER=FL+Stack /STK=50 /UG=Mm.2945 /LL=12345 /DEF=Mus musculus capping protein beta 1 (Cappb1), mRNA. /PROD=capping protein beta 1 /FL=gb:U10407.1 gb:BC002053.1 gb:NM_009798.1
1417316_at	1751	P	0.00024	-1.2	-2.3	D	0.99998	2e-05	gb:NM_025790.1 /DB_XREF=gi:13385259 /GEN=0610006O17Rik /FEA=FLmRNA /CNT=100 /TID=Mm.2125.1 /TIER=FL+Stack /STK=48 /UG=Mm.2125 /LL=66834 /DEF=Mus musculus RIKEN cDNA 0610006O17 gene (0610006O17Rik), mRNA. /PROD=RIKEN cDNA 0610006O17 /FL=gb:BC018165.1 gb:NM_025790.1
1417320_at	1042.5	P	0.00195	-1.2	-2.3	D	0.99945	0.00055	gb:NM_024478.1 /DB_XREF=gi:13277393 /GEN=Grpel1 /FEA=FLmRNA /CNT=96 /TID=Mm.21535.1 /TIER=FL+Stack /STK=48 /UG=Mm.21535 /LL=17713 /DEF=Mus musculus GrpE-like 1, mitochondrial (Grpel1), mRNA. /PROD=GrpE-like 1, mitochondrial /FL=gb:NM_024478.1 gb:BC002284.1
1417339_a_at	1957.7	P	0.00024	-1.2	-2.3	D	0.99989	0.00011	gb:NM_019682.1 /DB_XREF=gi:9790156 /GEN=Dnclc1 /FEA=FLmRNA /CNT=271 /TID=Mm.29908.1 /TIER=FL+Stack /STK=47 /UG=Mm.29908 /LL=56455 /DEF=Mus musculus dynein, cytoplasmic, light chain 1 (Dnclc1), mRNA. /PROD=dynein, cytoplasmic, light peptide /FL=gb:BC008106.1 gb:NM_019682.1 gb:AF020185.1
1417373_a_at	10055.1	P	0.00024	-1.2	-2.3	D	0.99997	3e-05	gb:NM_009447.1 /DB_XREF=gi:6678466 /GEN=Tuba4 /FEA=FLmRNA /CNT=202 /TID=Mm.1155.1 /TIER=FL+Stack /STK=46 /UG=Mm.1155 /LL=22145 /DEF=Mus musculus tubulin, alpha 4 (Tuba4), mRNA. /PROD=tubulin, alpha 4 /FL=gb:NM_009447.1 gb:BC019959.1 gb:M13444.1
1417511_at	464.4	P	0.00073	-1.2	-2.3	D	0.99979	0.00021	gb:NM_025281.1 /DB_XREF=gi:13384621 /GEN=Lyar /FEA=FLmRNA /CNT=93 /TID=Mm.28560.1 /TIER=FL+Stack /STK=43 /UG=Mm.28560 /LL=17089 /DEF=Mus musculus Ly1 antibody reactive clone (Lyar), mRNA. /PROD=Ly1 antibody reactive clone /FL=gb:NM_025281.1
1417608_a_at	2590.7	P	0.00195	-1.2	-2.3	D	0.99998	2e-05	gb:NM_009438.1 /DB_XREF=gi:7110730 /GEN=Rpl13a /FEA=FLmRNA /CNT=73 /TID=Mm.13020.1 /TIER=FL+Stack /STK=40 /UG=Mm.13020 /LL=22121 /DEF=Mus musculus ribosomal protein L13a (Rpl13a), mRNA. /PROD=ribosomal protein L13a /FL=gb:NM_009438.1
1417619_at	382.3	P	0.00586	-1.2	-2.3	D	0.99995	5e-05	gb:NM_026320.1 /DB_XREF=gi:13385817 /GEN=2310040G17Rik /FEA=FLmRNA /CNT=69 /TID=Mm.70462.1 /TIER=FL+Stack /STK=40 /UG=Mm.70462 /LL=102060 /DEF=Mus musculus RIKEN cDNA 2310040G17 gene (2310040G17Rik), mRNA. /PROD=RIKEN cDNA 2310040G17 /FL=gb:NM_026320.1 gb:BC022592.1
1417712_at	2753.2	P	0.00024	-1.2	-2.3	D	0.99996	4e-05	gb:AI194712 /DB_XREF=gi:3747318 /DB_XREF=ui55f11.x1 /CLONE=IMAGE:1886349 /FEA=FLmRNA /CNT=448 /TID=Mm.29859.1 /TIER=Stack /STK=184 /UG=Mm.29859 /LL=67204 /UG_GENE=Eif2s2 /UG_TITLE=eukaryotic translation initiation factor 2, subunit 2 (beta, 38kDa) /FL=gb:NM_026030.1 gb:BC003848.1
1417951_at	12421.9	P	0.00024	-1.2	-2.3	D	0.99997	3e-05	gb:NM_007933.1 /DB_XREF=gi:6679650 /GEN=Eno3 /FEA=FLmRNA /CNT=114 /TID=Mm.29994.1 /TIER=FL+Stack /STK=32 /UG=Mm.29994 /LL=13808 /DEF=Mus musculus enolase 3, beta muscle (Eno3), mRNA. /PROD=enolase 3, beta muscle /FL=gb:NM_007933.1 gb:BC013460.1
1418005_at	6954.8	P	0.00024	-1.2	-2.3	D	0.99997	3e-05	gb:BC013509.1 /DB_XREF=gi:15488735 /FEA=FLmRNA /CNT=110 /TID=Mm.29141.1 /TIER=FL+Stack /STK=31 /UG=Mm.29141 /LL=67680 /UG_GENE=0710008N11Rik /DEF=Mus musculus, RIKEN cDNA 0710008N11 gene, clone MGC:19177 IMAGE:4225025, mRNA, complete cds. /PROD=RIKEN cDNA 0710008N11 gene /FL=gb:BC013509.1 gb:NM_023374.1
1418010_a_at	4616.1	P	0.00024	-1.2	-2.3	D	0.99998	2e-05	gb:BC024362.1 /DB_XREF=gi:19354391 /FEA=FLmRNA /CNT=277 /TID=Mm.182692.1 /TIER=FL+Stack /STK=31 /UG=Mm.182692 /LL=54673 /UG_GENE=Sh3glb1 /DEF=Mus musculus, SH3-domain GRB2-like B1 (endophilin), clone MGC:35926 IMAGE:5031296, mRNA, complete cds. /PROD=SH3-domain GRB2-like B1 (endophilin) /FL=gb:BC024362.1 gb:NM_019464.1 gb:AF263364.1
1418228_at	870	P	0.00415	-1.2	-2.3	D	0.99956	0.00044	gb:BC018355.1 /DB_XREF=gi:17390829 /FEA=FLmRNA /CNT=80 /TID=Mm.23809.1 /TIER=FL+Stack /STK=27 /UG=Mm.23809 /LL=56748 /UG_GENE=Hirip5 /DEF=Mus musculus, histone cell cycle regulation defective interacting protein 5, clone MGC:5675 IMAGE:3584656, mRNA, complete cds. /PROD=histone cell cycle regulation defectiveinteracting protein 5 /FL=gb:NM_020045.1 gb:BC018355.1
1418439_at	4059.2	P	0.00024	-1.2	-2.3	D	0.99997	4e-05	gb:NM_026065.1 /DB_XREF=gi:13385563 /GEN=2900055D03Rik /FEA=FLmRNA /CNT=76 /TID=Mm.30008.1 /TIER=FL+Stack /STK=23 /UG=Mm.30008 /LL=67270 /DEF=Mus musculus RIKEN cDNA 2900055D03 gene (2900055D03Rik), mRNA. /PROD=RIKEN cDNA 2900055D03 /FL=gb:BC024337.1 gb:NM_026065.1
1418566_s_at	329.9	P	0.01856	-1.2	-2.3	D	0.99903	0.00097	gb:BC005646.1 /DB_XREF=gi:13542905 /FEA=FLmRNA /CNT=157 /TID=Mm.30177.1 /TIER=FL+Stack /STK=21 /UG=Mm.30177 /LL=67191 /UG_GENE=2700047N05Rik /DEF=Mus musculus, RIKEN cDNA 2700047N05 gene, clone MGC:12088 IMAGE:3708975, mRNA, complete cds. /PROD=RIKEN cDNA 2700047N05 gene /FL=gb:NM_026023.1 gb:BC005646.1
1418624_at	6073.5	P	0.00024	-1.2	-2.3	D	0.99998	2e-05	gb:BC013620.1 /DB_XREF=gi:15488998 /FEA=FLmRNA /CNT=402 /TID=Mm.21054.1 /TIER=FL+Stack /STK=20 /UG=Mm.21054 /LL=22608 /UG_GENE=Nsep1 /DEF=Mus musculus, Y box protein 1, clone MGC:11498 IMAGE:3968068, mRNA, complete cds. /PROD=Y box protein 1 /FL=gb:BC013620.1 gb:M62867.1 gb:NM_011732.1 gb:BC013450.1 gb:M60419.1 gb:U33197.1 gb:U33196.1
1418625_s_at	7408.3	P	0.00024	-1.2	-2.3	D	0.99998	2e-05	gb:NM_008084.1 /DB_XREF=gi:6679936 /GEN=Gapd /FEA=FLmRNA /CNT=163 /TID=Mm.5289.1 /TIER=FL+Stack /STK=20 /UG=Mm.5289 /LL=14433 /DEF=Mus musculus glyceraldehyde-3-phosphate dehydrogenase (Gapd), mRNA. /PROD=glyceraldehyde-3-phosphate dehydrogenase /FL=gb:M32599.1 gb:NM_008084.1
1418677_at	12476.8	P	0.00024	-1.2	-2.3	D	0.99981	0.00019	gb:NM_013456.1 /DB_XREF=gi:7304854 /GEN=Actn3 /FEA=FLmRNA /CNT=42 /TID=Mm.5316.1 /TIER=FL+Stack /STK=20 /UG=Mm.5316 /LL=11474 /DEF=Mus musculus actinin alpha 3 (Actn3), mRNA. /PROD=actinin alpha 3 /FL=gb:AF093775.1 gb:NM_013456.1
1418709_at	2662.1	P	0.00024	-1.2	-2.3	D	0.99956	0.00044	gb:AF037370.1 /DB_XREF=gi:3213235 /GEN=Cox7ah /FEA=FLmRNA /CNT=35 /TID=Mm.12907.1 /TIER=FL+Stack /STK=19 /UG=Mm.12907 /LL=12865 /DEF=Mus musculus cytochrome c oxidase subunit VIIa-H precursor (Cox7ah) mRNA, nuclear gene encoding mitochondrial protein, complete cds. /PROD=cytochrome c oxidase subunit VIIa-H precursor /FL=gb:AF037370.1 gb:NM_009944.1
1419312_at	10814.4	P	0.00024	-1.2	-2.3	D	0.99995	5e-05	gb:NM_007504.1 /DB_XREF=gi:6671588 /GEN=Atp2a1 /FEA=FLmRNA /CNT=58 /TID=Mm.35134.1 /TIER=FL+Stack /STK=11 /UG=Mm.35134 /LL=11937 /DEF=Mus musculus ATPase, Ca++ transporting, cardiac muscle, fast twitch 1 (Atp2a1), mRNA. /PROD=ATPase, Ca++ transporting, fast twitch 1 /FL=gb:AY081946.1 gb:NM_007504.1
1419363_a_at	756.8	P	0.00073	-1.2	-2.3	D	0.99945	0.00055	gb:BF787384 /DB_XREF=gi:12092420 /DB_XREF=602113783F1 /CLONE=IMAGE:4241684 /FEA=FLmRNA /CNT=91 /TID=Mm.28579.1 /TIER=Stack /STK=29 /UG=Mm.28579 /LL=66223 /UG_GENE=1110066C01Rik /UG_TITLE=RIKEN cDNA 1110066C01 gene /FL=gb:NM_025430.1
1419421_at	2005.2	P	0.00024	-1.2	-2.3	D	0.99951	0.00049	gb:NM_031158.1 /DB_XREF=gi:13624296 /GEN=Ank1 /FEA=FLmRNA /CNT=28 /TID=Mm.4789.1 /TIER=FL+Stack /STK=10 /UG=Mm.4789 /LL=11733 /DEF=Mus musculus ankyrin 1, erythroid (Ank1), mRNA. /PROD=ankyrin 1, erythroid /FL=gb:NM_031158.1
1419423_at	132.8	P	0.00806	-1.2	-2.3	D	0.99951	0.00049	gb:NM_138673.1 /DB_XREF=gi:20149763 /GEN=Stab2-pending /FEA=FLmRNA /CNT=23 /TID=Mm.40289.1 /TIER=FL+Stack /STK=10 /UG=Mm.40289 /LL=192188 /DEF=Mus musculus stabilin 2 (Stab2-pending), mRNA. /PROD=stabilin-2 /FL=gb:NM_138673.1 gb:AF364951.2
1419687_at	3482.8	P	0.00024	-1.2	-2.3	D	0.99981	0.00019	gb:NM_134147.1 /DB_XREF=gi:19527383 /GEN=AI604841 /FEA=FLmRNA /CNT=26 /TID=Mm.38346.1 /TIER=FL /STK=7 /UG=Mm.38346 /LL=107227 /DEF=Mus musculus expressed sequence AI604841 (AI604841), mRNA. /PROD=expressed sequence AI604841 /FL=gb:NM_134147.1 gb:BC008653.1
1419737_a_at	10360.9	P	0.00024	-1.2	-2.3	D	0.99976	0.00024	gb:NM_010699.1 /DB_XREF=gi:6754523 /GEN=Ldh1 /FEA=FLmRNA /CNT=73 /TID=Mm.141443.1 /TIER=FL /STK=6 /UG=Mm.141443 /LL=16828 /DEF=Mus musculus lactate dehydrogenase 1, A chain (Ldh1), mRNA. /PROD=lactate dehydrogenase 1, A chain /FL=gb:U13687.1 gb:M17516.1 gb:NM_010699.1
1419988_at	164.9	P	0.00806	-1.2	-2.3	D	0.99981	0.00019	gb:C87327 /DB_XREF=gi:2919284 /DB_XREF=C87327 /CLONE=J0243G09 /FEA=EST /CNT=1 /TID=Mm.197604.1 /TIER=ConsEnd /STK=1 /UG=Mm.197604 /LL=93774 /UG_GENE=C87327 /UG_TITLE=EST C87327
1420489_at	2344.9	P	0.00195	-1.2	-2.3	D	0.99994	6e-05	gb:BI246587 /DB_XREF=gi:14790692 /DB_XREF=602958305F1 /CLONE=IMAGE:5124168 /FEA=FLmRNA /CNT=94 /TID=Mm.29599.1 /TIER=Stack /STK=41 /UG=Mm.29599 /LL=64659 /UG_GENE=Mrps14 /UG_TITLE=mitochondrial ribosomal protein S14 /FL=gb:NM_025474.1
1421014_a_at	516.9	P	0.00024	-1.2	-2.3	D	0.99956	0.00044	gb:BC023398.1 /DB_XREF=gi:19484077 /FEA=FLmRNA /CNT=22 /TID=Mm.34608.1 /TIER=FL /STK=2 /UG=Mm.34608 /LL=69634 /UG_GENE=Clybl /DEF=Mus musculus, citrate lyase beta like, clone MGC:32507 IMAGE:5064709, mRNA, complete cds. /PROD=citrate lyase beta like /FL=gb:NM_029556.1 gb:AF428254.1 gb:BC023398.1
1422156_a_at	9929.6	P	0.00024	-1.2	-2.3	D	0.99998	2e-05	gb:NM_008503.2 /DB_XREF=gi:18087804 /GEN=Rps2 /FEA=FLmRNA /CNT=5 /TID=Mm.1129.1 /TIER=FL /STK=1 /UG=Mm.1129 /LL=16898 /DEF=Mus musculus ribosomal protein S2 (Rps2), mRNA. /PROD=ribosomal protein S2 /FL=gb:NM_008503.2
1422241_a_at	7845.8	P	0.00024	-1.2	-2.3	D	0.99998	2e-05	gb:NM_019443.1 /DB_XREF=gi:9506910 /GEN=Ndufa1 /FEA=FLmRNA /CNT=3 /TID=Mm.34869.1 /TIER=FL /STK=1 /UG=Mm.34869 /LL=54405 /DEF=Mus musculus NADH dehydrogenase (ubiquinone) 1 alpha subcomplex, 1 (Ndufa1), mRNA. /PROD=NADH dehydrogenase (ubiquinone) 1 alphasubcomplex, 1 (7.5kD, MWFE) /FL=gb:NM_019443.1
1422644_at	5852.3	P	0.00024	-1.2	-2.3	D	0.99998	2e-05	gb:NM_015825.1 /DB_XREF=gi:7657557 /GEN=Sh3bgr /FEA=FLmRNA /CNT=53 /TID=Mm.28638.1 /TIER=FL+Stack /STK=22 /UG=Mm.28638 /LL=50795 /DEF=Mus musculus SH3-binding domain glutamic acid-rich protein (Sh3bgr), mRNA. /PROD=SH3-binding domain glutamic acid-rich protein /FL=gb:NM_015825.1
1423049_a_at	10812.9	P	0.00024	-1.2	-2.3	D	0.99997	4e-05	gb:AK002271.1 /DB_XREF=gi:12832132 /GEN=Tpm2 /FEA=FLmRNA /CNT=227 /TID=Mm.121878.1 /TIER=Stack /STK=95 /UG=Mm.121878 /LL=22003 /UG_TITLE=tropomyosin 1, alpha /DEF=Mus musculus adult male kidney cDNA, RIKEN full-length enriched library, clone:0610007B22:tropomyosin 2, beta, full insert sequence. /FL=gb:NM_024427.1
1423104_at	2728	P	0.00024	-1.2	-2.3	D	0.99998	2e-05	gb:BB345784 /DB_XREF=gi:16404985 /DB_XREF=BB345784 /CLONE=B930058J01 /FEA=FLmRNA /CNT=121 /TID=Mm.4952.1 /TIER=Stack /STK=54 /UG=Mm.4952 /LL=16367 /UG_GENE=Irs1 /UG_TITLE=insulin receptor substrate 1 /FL=gb:L24563.1 gb:NM_010570.1
1423145_a_at	5515.6	P	0.00024	-1.2	-2.3	D	0.99997	3e-05	gb:AK010167.1 /DB_XREF=gi:12845417 /GEN=Tcap /FEA=FLmRNA /CNT=56 /TID=Mm.10762.1 /TIER=Stack /STK=40 /UG=Mm.10762 /LL=21393 /UG_TITLE=titin-cap /DEF=Mus musculus adult male tongue cDNA, RIKEN full-length enriched library, clone:2310075E03:titin-cap, full insert sequence. /FL=gb:NM_011540.1
1423451_at	249.1	P	0.00024	-1.2	-2.3	D	0.99923	0.00077	gb:AI574180 /DB_XREF=gi:4537554 /DB_XREF=uj16h09.x1 /CLONE=IMAGE:1908257 /FEA=FLmRNA /CNT=303 /TID=Mm.9052.1 /TIER=Stack /STK=20 /UG=Mm.9052 /LL=53328 /UG_GENE=Pgrmc1 /UG_TITLE=progesterone receptor membrane component 1 /FL=gb:BC006016.1 gb:NM_016783.1 gb:AF042491.1
1423486_at	719.8	P	0.00024	-1.2	-2.3	D	0.99938	0.00062	gb:BI077809 /DB_XREF=gi:14496139 /DB_XREF=602871594F1 /CLONE=IMAGE:5003662 /FEA=FLmRNA /CNT=195 /TID=Mm.21149.1 /TIER=Stack /STK=15 /UG=Mm.21149 /LL=56724 /UG_GENE=Cript-pending /UG_TITLE=postsynaptic protein Cript /FL=gb:BC023013.1 gb:NM_019936.1 gb:AF151637.1
1423616_at	183	M	0.05615	-1.2	-2.3	D	0.99923	0.00077	gb:BE373492 /DB_XREF=gi:9318855 /DB_XREF=601225863F1 /CLONE=IMAGE:3584438 /FEA=FLmRNA /CNT=94 /TID=Mm.176.1 /TIER=Stack /STK=8 /UG=Mm.176 /LL=21357 /UG_GENE=Tarbp2 /UG_TITLE=TAR (HIV) RNA binding protein 2 /FL=gb:U79962.1 gb:BC002028.1 gb:NM_009319.1
1423665_a_at	7902.9	P	0.00024	-1.2	-2.3	D	0.99998	2e-05	gb:BC026934.1 /DB_XREF=gi:20071189 /FEA=FLmRNA /CNT=412 /TID=Mm.4419.1 /TIER=FL+Stack /STK=178 /UG=Mm.4419 /LL=19983 /UG_GENE=Rpl5 /DEF=Mus musculus, ribosomal protein L5, clone MGC:25420 IMAGE:2651564, mRNA, complete cds. /PROD=ribosomal protein L5 /FL=gb:BC026934.1
1424073_at	909.3	P	0.00293	-1.2	-2.3	D	0.99931	0.00069	gb:BC005692.1 /DB_XREF=gi:13543026 /FEA=FLmRNA /CNT=136 /TID=Mm.21749.1 /TIER=FL+Stack /STK=56 /UG=Mm.21749 /LL=68251 /UG_GENE=5430437P03Rik /DEF=Mus musculus, Similar to HSPC142 protein, clone MGC:11854 IMAGE:3597632, mRNA, complete cds. /PROD=Similar to HSPC142 protein /FL=gb:BC005692.1
1424085_at	3183.3	P	0.00024	-1.2	-2.3	D	0.99998	2e-05	gb:BC011114.1 /DB_XREF=gi:15029785 /FEA=FLmRNA /CNT=105 /TID=Mm.41926.1 /TIER=FL+Stack /STK=55 /UG=Mm.41926 /LL=17992 /UG_GENE=Ndufa4 /DEF=Mus musculus, NADH dehydrogenase (ubiquinone) 1 alpha subcomplex, 4, clone MGC:7218 IMAGE:3483028, mRNA, complete cds. /PROD=NADH dehydrogenase (ubiquinone) 1 alphasubcomplex, 4 /FL=gb:BC011114.1
1424095_at	587.8	P	0.00024	-1.2	-2.3	D	0.99992	8e-05	gb:BC016519.1 /DB_XREF=gi:16741388 /FEA=FLmRNA /CNT=93 /TID=Mm.34038.1 /TIER=FL+Stack /STK=54 /UG=Mm.34038 /LL=66368 /UG_GENE=2310009A18Rik /DEF=Mus musculus, clone MGC:27879 IMAGE:3495638, mRNA, complete cds. /PROD=Unknown (protein for MGC:27879) /FL=gb:BC016519.1
1424177_at	3109.4	P	0.00073	-1.2	-2.3	D	0.99956	0.00044	gb:BC024788.1 /DB_XREF=gi:19353743 /FEA=FLmRNA /CNT=90 /TID=Mm.212927.1 /TIER=FL+Stack /STK=47 /UG=Mm.212927 /DEF=Mus musculus, clone MGC:36643 IMAGE:5360106, mRNA, complete cds. /PROD=Unknown (protein for MGC:36643) /FL=gb:BC024788.1 gb:BC014728.1
1424204_at	1024.6	P	0.00586	-1.2	-2.3	D	0.99945	0.00055	gb:AB049641.1 /DB_XREF=gi:13559372 /GEN=MRPL13 /FEA=FLmRNA /CNT=75 /TID=Mm.10076.1 /TIER=FL+Stack /STK=45 /UG=Mm.10076 /LL=68537 /DEF=Mus musculus MRPL13 mRNA for mitochondrial ribosomal protein L13 (L13mt), complete cds. /PROD=mitochondrial ribosomal protein L13 (L13mt) /FL=gb:AB049641.1
1424283_at	2328	P	0.00024	-1.2	-2.3	D	0.99923	0.00077	gb:BC008139.1 /DB_XREF=gi:14198163 /FEA=FLmRNA /CNT=72 /TID=Mm.13912.1 /TIER=FL+Stack /STK=40 /UG=Mm.13912 /LL=23922 /UG_GENE=Jtb /DEF=Mus musculus, clone MGC:5746 IMAGE:3582930, mRNA, complete cds. /PROD=Unknown (protein for MGC:5746) /FL=gb:BC008139.1 gb:AB016490.1
1424505_at	264.4	A	0.14966	-1.2	-2.3	D	0.99985	0.00015	gb:BC027299.1 /DB_XREF=gi:20071076 /FEA=FLmRNA /CNT=49 /TID=Mm.139233.1 /TIER=FL+Stack /STK=28 /UG=Mm.139233 /LL=66084 /UG_GENE=0610042C05Rik /DEF=Mus musculus, Similar to hypothetical protein FLJ20627, clone MGC:28177 IMAGE:3987394, mRNA, complete cds. /PROD=Similar to hypothetical protein FLJ20627 /FL=gb:BC027299.1
1424562_a_at	10406.6	P	0.00024	-1.2	-2.3	D	0.99996	4e-05	gb:BC026925.1 /DB_XREF=gi:20070837 /FEA=FLmRNA /CNT=234 /TID=Mm.16228.1 /TIER=FL+Stack /STK=24 /UG=Mm.16228 /LL=11739 /UG_GENE=Slc25a4 /DEF=Mus musculus, clone MGC:25083 IMAGE:4500784, mRNA, complete cds. /PROD=Unknown (protein for MGC:25083) /FL=gb:BC026925.1 gb:U27315.1 gb:BC003791.1
1425185_at	1460.7	P	0.00073	-1.2	-2.3	D	0.99991	9e-05	gb:BB245100 /DB_XREF=gi:16355367 /DB_XREF=BB245100 /CLONE=A730007C13 /FEA=FLmRNA /CNT=90 /TID=Mm.26611.1 /TIER=Stack /STK=28 /UG=Mm.26611 /LL=78825 /UG_GENE=5830417C01Rik /UG_TITLE=RIKEN cDNA 5830417C01 gene /FL=gb:BC002200.1
1426326_at	409.3	P	0.00024	-1.2	-2.3	D	0.99923	0.00077	gb:U05343.1 /DB_XREF=gi:453375 /GEN=Pzf /FEA=FLmRNA /CNT=27 /TID=Mm.140246.1 /TIER=FL /STK=0 /UG=Mm.140246 /LL=109910 /DEF=Mus musculus Balbc zinc finger protein PZF (Pzf) mRNA, complete cds. /PROD=zinc finger protein PZF /FL=gb:U05343.1
1426586_at	1926.8	P	0.04614	-1.2	-2.3	D	0.99998	2e-05	gb:AI647500 /DB_XREF=gi:4726178 /DB_XREF=uk42h11.x1 /CLONE=IMAGE:1971717 /FEA=FLmRNA /CNT=172 /TID=Mm.28466.1 /TIER=Stack /STK=12 /UG=Mm.28466 /LL=67863 /UG_GENE=Slc25a11 /UG_TITLE=solute carrier family 25 (mitochondrial carrier; oxoglutarate carrier), member 11 /FL=gb:BC003455.1 gb:BC019631.1
1426710_at	697.3	P	0.00122	-1.2	-2.3	D	0.99945	0.00055	gb:BB396904 /DB_XREF=gi:16411476 /DB_XREF=BB396904 /CLONE=C230099N07 /FEA=mRNA /CNT=175 /TID=Mm.1147.1 /TIER=Stack /STK=98 /UG=Mm.1147 /UG_TITLE=Mus musculus calmodulin III (Calm3) mRNA, 3 untranslated region
1427913_at	2073.5	P	0.00024	-1.2	-2.3	D	0.99914	0.00087	gb:AK003262.1 /DB_XREF=gi:12833821 /FEA=mRNA /CNT=100 /TID=Mm.28528.1 /TIER=Stack /STK=26 /UG=Mm.28528 /LL=66521 /UG_GENE=2610002D06Rik /UG_TITLE=RIKEN cDNA 2610002D06 gene /DEF=Mus musculus 18 days embryo whole body cDNA, RIKEN full-length enriched library, clone:1110001O17:homolog to SMALL ANDROGEN RECEPTOR-INTERACTING PROTEIN, full insert sequence.
1428122_s_at	313.6	P	0.00586	-1.2	-2.3	D	0.99945	0.00055	gb:BB556671 /DB_XREF=gi:16448715 /DB_XREF=BB556671 /CLONE=E330024M11 /FEA=mRNA /CNT=169 /TID=Mm.23017.1 /TIER=Stack /STK=104 /UG=Mm.23017 /LL=72543 /UG_GENE=2610528K11Rik /UG_TITLE=RIKEN cDNA 2610528K11 gene
1428143_a_at	891.2	P	0.00073	-1.2	-2.3	D	0.99923	0.00077	gb:AK003207.1 /DB_XREF=gi:12833731 /FEA=mRNA /CNT=179 /TID=Mm.29998.1 /TIER=Stack /STK=95 /UG=Mm.29998 /LL=66853 /UG_GENE=0610039C21Rik /UG_TITLE=RIKEN cDNA 0610039C21 gene /DEF=Mus musculus 18 days embryo whole body cDNA, RIKEN full-length enriched library, clone:1110001C14:similar to HYPOTHETICAL 19.8 KDA PROTEIN (FRAGMENT), full insert sequence.
1428179_at	5423.2	P	0.00024	-1.2	-2.3	D	0.99998	2e-05	gb:BI692577 /DB_XREF=gi:15655206 /DB_XREF=603343427F1 /CLONE=IMAGE:5371014 /FEA=mRNA /CNT=150 /TID=Mm.2206.1 /TIER=Stack /STK=79 /UG=Mm.2206 /LL=72900 /UG_GENE=Ndufv2 /UG_TITLE=NADH dehydrogenase (ubiquinone) flavoprotein 2
1428212_x_at	6645.9	P	0.00073	-1.2	-2.3	D	0.99998	2e-05	gb:BM239931 /DB_XREF=gi:17875201 /DB_XREF=K0542F06-3 /CLONE=K0542F06 /FEA=mRNA /CNT=167 /TID=Mm.29982.2 /TIER=Stack /STK=70 /UG=Mm.29982 /LL=114641 /UG_GENE=Rpl31 /UG_TITLE=ribosomal protein L31
1428464_at	6385.4	P	0.00024	-1.2	-2.3	D	0.99992	8e-05	gb:AV048277 /DB_XREF=gi:16380565 /DB_XREF=AV048277 /CLONE=1810004C04 /FEA=mRNA /CNT=85 /TID=Mm.30150.1 /TIER=Stack /STK=40 /UG=Mm.30150 /LL=66091 /UG_GENE=1010001M12Rik /UG_TITLE=RIKEN cDNA 1010001M12 gene
1428619_at	694.8	P	0.00024	-1.2	-2.3	D	0.99995	5e-05	gb:BB783243 /DB_XREF=gi:16951739 /DB_XREF=BB783243 /CLONE=G430086J06 /FEA=mRNA /CNT=45 /TID=Mm.28927.1 /TIER=Stack /STK=29 /UG=Mm.28927 /LL=66359 /UG_GENE=2310005N03Rik /UG_TITLE=RIKEN cDNA 2310005N03 gene
1430713_s_at	7352.8	P	0.00024	-1.2	-2.3	D	0.99923	0.00077	gb:AI429575 /DB_XREF=gi:4275501 /DB_XREF=mf54c02.x1 /CLONE=IMAGE:408866 /FEA=mRNA /CNT=5 /TID=Mm.9326.4 /TIER=ConsEnd /STK=1 /UG=Mm.9326 /LL=24017 /UG_GENE=Rnf13 /UG_TITLE=ring finger protein 13
1431765_a_at	8158.4	P	0.00024	-1.2	-2.3	D	0.99998	2e-05	gb:AK004568.1 /DB_XREF=gi:12835826 /GEN=Rps2 /FEA=mRNA /CNT=2 /TID=Mm.1129.4 /TIER=ConsEnd /STK=0 /UG=Mm.1129 /LL=16898 /UG_TITLE=ribosomal protein S2 /DEF=Mus musculus adult male lung cDNA, RIKEN full-length enriched library, clone:1200003H09:ribosomal protein S2, full insert sequence.
1432827_x_at	7813	P	0.00073	-1.2	-2.3	D	0.99995	5e-05	gb:BI653033 /DB_XREF=gi:15567269 /DB_XREF=603300728F1 /CLONE=IMAGE:5341110 /FEA=mRNA /CNT=2 /TID=Mm.331.5 /TIER=ConsEnd /STK=0 /UG=Mm.331 /LL=22190 /UG_GENE=Ubc /UG_TITLE=ubiquitin C
1433516_a_at	1405.8	P	0.00024	-1.2	-2.3	D	0.99945	0.00055	gb:BE945188 /DB_XREF=gi:10522947 /DB_XREF=UI-M-BZ0-axk-a-02-0-UI.s1 /CLONE=UI-M-BZ0-axk-a-02-0-UI /FEA=EST /CNT=123 /TID=Mm.30179.1 /TIER=Stack /STK=112 /UG=Mm.30179 /UG_TITLE=ESTs
1433604_x_at	10361.3	P	0.00024	-1.2	-2.3	D	0.99973	0.00027	gb:BG065457 /DB_XREF=gi:12548020 /DB_XREF=H3031D03-3 /CLONE=H3031D03 /FEA=EST /CNT=106 /TID=Mm.16763.3 /TIER=Stack /STK=83 /UG=Mm.16763 /LL=11674 /UG_GENE=Aldo1 /UG_TITLE=aldolase 1, A isoform
1433688_x_at	2743.2	P	0.00073	-1.2	-2.3	D	0.99991	9e-05	gb:BE993872 /DB_XREF=gi:10676528 /DB_XREF=UI-M-BZ1-bji-a-11-0-UI.s1 /CLONE=UI-M-BZ1-bji-a-11-0-UI /FEA=EST /CNT=76 /TID=Mm.43749.3 /TIER=Stack /STK=72 /UG=Mm.43749 /LL=67115 /UG_GENE=3100001N19Rik /UG_TITLE=RIKEN cDNA 3100001N19 gene
1433822_x_at	6252.1	P	0.00024	-1.2	-2.3	D	0.99991	9e-05	gb:AI842295 /DB_XREF=gi:5476548 /DB_XREF=UI-M-AM1-afz-f-10-0-UI.s1 /CLONE=UI-M-AM1-afz-f-10-0-UI /FEA=EST /CNT=62 /TID=Mm.45312.3 /TIER=Stack /STK=58 /UG=Mm.45312 /LL=59008 /UG_GENE=Anapc5 /UG_TITLE=anaphase-promoting complex subunit 5
1433951_at	758.6	P	0.00024	-1.2	-2.3	D	0.99903	0.00097	gb:BG064956 /DB_XREF=gi:12547519 /DB_XREF=H3025G06-3 /CLONE=H3025G06 /FEA=EST /CNT=118 /TID=Mm.28972.1 /TIER=Stack /STK=49 /UG=Mm.28972 /LL=97043 /UG_GENE=T25534 /UG_TITLE=expressed sequence T25534
1434216_a_at	1235.9	P	0.00024	-1.2	-2.3	D	0.99951	0.00049	gb:BG070689 /DB_XREF=gi:12553258 /DB_XREF=H3090A09-3 /CLONE=H3090A09 /FEA=EST /CNT=56 /TID=Mm.27194.3 /TIER=Stack /STK=38 /UG=Mm.27194 /LL=110959 /UG_GENE=D7Rp2e /UG_TITLE=DNA segment, Chr 7, Roswell Park 2 complex, expressed
1434799_x_at	11524.8	P	0.00024	-1.2	-2.3	D	0.99998	2e-05	gb:BG793658 /DB_XREF=gi:14129228 /DB_XREF=UTSW_SM14F1 /CLONE=UTSW_SM14F1 /FEA=EST /CNT=28 /TID=Mm.16763.4 /TIER=Stack /STK=25 /UG=Mm.16763 /LL=11674 /UG_GENE=Aldo1 /UG_TITLE=aldolase 1, A isoform
1434854_a_at	2153.7	P	0.00073	-1.2	-2.3	D	0.99965	0.00035	gb:BB000887 /DB_XREF=gi:7840815 /DB_XREF=BB000887 /CLONE=2700052M12 /FEA=EST /CNT=27 /TID=Mm.39130.3 /TIER=Stack /STK=24 /UG=Mm.39130 /LL=67097 /UG_GENE=2210402A09Rik /UG_TITLE=RIKEN cDNA 2210402A09 gene
1435738_x_at	1637.3	P	0.00073	-1.2	-2.3	D	0.99965	0.00035	gb:AA271358 /DB_XREF=gi:1909869 /DB_XREF=vb72c05.r1 /CLONE=IMAGE:762536 /FEA=EST /CNT=66 /TID=Mm.200975.7 /TIER=Stack /STK=13 /UG=Mm.200975 /LL=20366 /UG_GENE=Serf2 /UG_TITLE=small EDRK-rich factor 2
1436803_a_at	7913.3	P	0.00024	-1.2	-2.3	D	0.99991	9e-05	gb:AV161987 /DB_XREF=gi:5427963 /DB_XREF=AV161987 /CLONE=3100003P05 /FEA=EST /CNT=52 /TID=Mm.4537.2 /TIER=Stack /STK=50 /UG=Mm.4537 /LL=66218 /UG_GENE=Ndufb9 /UG_TITLE=NADH dehydrogenase (ubiquinone) 1 beta subcomplex, 9
1436995_a_at	6110.6	P	0.00024	-1.2	-2.3	D	0.99997	4e-05	gb:AV124660 /DB_XREF=gi:5310894 /DB_XREF=AV124660 /CLONE=2700022B07 /FEA=EST /CNT=31 /TID=Mm.3229.2 /TIER=Stack /STK=31 /UG=Mm.3229 /LL=19941 /UG_GENE=Rpl26 /UG_TITLE=ribosomal protein L26
1437450_x_at	4282.1	P	0.00024	-1.2	-2.3	D	0.99998	2e-05	gb:AV167877 /DB_XREF=gi:5374314 /DB_XREF=AV167877 /CLONE=3110057N01 /FEA=EST /CNT=18 /TID=Mm.21932.3 /TIER=Stack /STK=18 /UG=Mm.21932 /LL=68045 /UG_GENE=2700060E02Rik /UG_TITLE=RIKEN cDNA 2700060E02 gene
1437510_x_at	6546.9	P	0.00024	-1.2	-2.3	D	0.99987	0.00013	gb:BB724547 /DB_XREF=gi:16107822 /DB_XREF=BB724547 /CLONE=C920026N23 /FEA=EST /CNT=18 /TID=Mm.42767.5 /TIER=Stack /STK=17 /UG=Mm.42767 /LL=20068 /UG_GENE=Rps17 /UG_TITLE=ribosomal protein S17
1437666_x_at	7373.3	P	0.00073	-1.2	-2.3	D	0.99995	5e-05	gb:AW551908 /DB_XREF=gi:7197331 /DB_XREF=L0205E01-3 /CLONE=L0205E01 /FEA=EST /CNT=17 /TID=Mm.331.6 /TIER=Stack /STK=15 /UG=Mm.331 /LL=22190 /UG_GENE=Ubc /UG_TITLE=ubiquitin C
1437687_x_at	2011.5	P	0.00024	-1.2	-2.3	D	0.99994	6e-05	gb:BB026630 /DB_XREF=gi:8202989 /DB_XREF=BB026630 /CLONE=5330434F12 /FEA=EST /CNT=16 /TID=Mm.20943.3 /TIER=Stack /STK=15 /UG=Mm.20943 /LL=27055 /UG_GENE=Fkbp9 /UG_TITLE=FK506 binding protein 9
1437802_x_at	1187.2	P	0.01074	-1.2	-2.3	D	0.99931	0.00069	gb:BM115860 /DB_XREF=gi:17078878 /DB_XREF=L0826E05-3 /CLONE=L0826E05 /FEA=EST /CNT=15 /TID=Mm.196508.8 /TIER=Stack /STK=14 /UG=Mm.196508 /LL=21761 /UG_GENE=Tex189 /UG_TITLE=testis expressed gene 189
1438177_x_at	2765.4	P	0.00293	-1.2	-2.3	D	0.99938	0.00062	gb:AV255351 /DB_XREF=gi:6242810 /DB_XREF=AV255351 /CLONE=4921519B12 /FEA=EST /CNT=12 /TID=Mm.20806.3 /TIER=Stack /STK=12 /UG=Mm.20806 /LL=67464 /UG_GENE=Lysal1 /UG_TITLE=lysosomal apyrase-like 1
1438183_x_at	412	P	0.00195	-1.2	-2.3	D	0.99998	2e-05	gb:AV253518 /DB_XREF=gi:6240977 /DB_XREF=AV253518 /CLONE=4921501E04 /FEA=EST /CNT=12 /TID=Mm.104920.3 /TIER=Stack /STK=12 /UG=Mm.104920 /LL=20322 /UG_GENE=Sdh1 /UG_TITLE=sorbitol dehydrogenase 1
1438507_x_at	3735.5	P	0.00073	-1.2	-2.3	D	0.99997	3e-05	gb:AV110879 /DB_XREF=gi:5264959 /DB_XREF=AV110879 /CLONE=2600014O22 /FEA=EST /CNT=12 /TID=Mm.43749.5 /TIER=Stack /STK=10 /UG=Mm.43749 /LL=67115 /UG_GENE=3100001N19Rik /UG_TITLE=RIKEN cDNA 3100001N19 gene
1438644_x_at	769.1	P	0.00073	-1.2	-2.3	D	0.99923	0.00077	gb:BB264843 /DB_XREF=gi:8961303 /DB_XREF=BB264843 /CLONE=A830016N02 /FEA=EST /CNT=10 /TID=Mm.22353.4 /TIER=Stack /STK=10 /UG=Mm.22353 /LL=76501 /UG_GENE=1810029F08Rik /UG_TITLE=RIKEN cDNA 1810029F08 gene
1438649_x_at	6270.9	P	0.00024	-1.2	-2.3	D	0.99997	3e-05	gb:AV207950 /DB_XREF=gi:6148803 /DB_XREF=AV207950 /CLONE=1700101G13 /FEA=EST /CNT=10 /TID=Mm.195898.6 /TIER=Stack /STK=10 /UG=Mm.195898 /LL=23980 /UG_GENE=Pbp /UG_TITLE=phosphatidylethanolamine binding protein
1439017_x_at	1988.7	P	0.00073	-1.2	-2.3	D	0.99993	7e-05	gb:AV301634 /DB_XREF=gi:16393411 /DB_XREF=AV301634 /CLONE=5730494O07 /FEA=EST /CNT=45 /TID=Mm.205010.4 /TIER=Stack /STK=8 /UG=Mm.205010 /LL=72674 /UG_GENE=2810031L11Rik /UG_TITLE=RIKEN cDNA 2810031L11 gene
1439375_x_at	8954.7	P	0.00024	-1.2	-2.3	D	0.99997	3e-05	gb:AV030922 /DB_XREF=gi:4830470 /DB_XREF=AV030922 /CLONE=1500016F05 /FEA=EST /CNT=8 /TID=Mm.16763.8 /TIER=Stack /STK=8 /UG=Mm.16763 /LL=11674 /UG_GENE=Aldo1 /UG_TITLE=aldolase 1, A isoform
1439405_x_at	1425.8	P	0.00024	-1.2	-2.3	D	0.99956	0.00044	gb:AV296285 /DB_XREF=gi:6328302 /DB_XREF=AV296285 /CLONE=5730440L02 /FEA=EST /CNT=8 /TID=Mm.178947.3 /TIER=Stack /STK=8 /UG=Mm.178947 /LL=56208 /UG_GENE=Becn1 /UG_TITLE=beclin 1 (coiled-coil, myosin-like BCL2-interacting protein)
1448182_a_at	4834.3	P	0.00024	-1.2	-2.3	D	0.99989	0.00011	gb:NM_009846.1 /DB_XREF=gi:6753341 /GEN=Cd24a /FEA=FLmRNA /CNT=468 /TID=Mm.6417.1 /TIER=FL+Stack /STK=140 /UG=Mm.6417 /LL=12484 /DEF=Mus musculus CD24a antigen (Cd24a), mRNA. /PROD=CD24a antigen /FL=gb:NM_009846.1 gb:M58661.1
1448194_a_at	8243.9	P	0.00024	-1.2	-2.3	D	0.99995	5e-05	gb:NM_023123.1 /DB_XREF=gi:12963478 /GEN=H19 /FEA=FLmRNA /CNT=341 /TID=Mm.14802.1 /TIER=FL+Stack /STK=137 /UG=Mm.14802 /LL=14955 /DEF=Mus musculus H19 fetal liver mRNA (H19), mRNA. /PROD=H19 fetal liver mRNA /FL=gb:NM_023123.1 gb:BC025150.1
1448238_at	2846	P	0.00024	-1.2	-2.3	D	0.99983	0.00017	gb:NM_026528.1 /DB_XREF=gi:13386025 /GEN=2700060E02Rik /FEA=FLmRNA /CNT=182 /TID=Mm.21932.1 /TIER=FL+Stack /STK=117 /UG=Mm.21932 /LL=68045 /DEF=Mus musculus RIKEN cDNA 2700060E02 gene (2700060E02Rik), mRNA. /PROD=RIKEN cDNA 2700060E02 /FL=gb:NM_026528.1
1448245_at	5946.3	P	0.00024	-1.2	-2.3	D	0.99998	2e-05	gb:NM_011029.1 /DB_XREF=gi:6754967 /GEN=Lamr1 /FEA=FLmRNA /CNT=295 /TID=Mm.4071.1 /TIER=FL+Stack /STK=114 /UG=Mm.4071 /LL=16785 /DEF=Mus musculus laminin receptor 1 (67kD, ribosomal protein SA) (Lamr1), mRNA. /PROD=laminin receptor 1 /FL=gb:BC003829.1 gb:AF140348.1 gb:J02870.1 gb:NM_011029.1
1448266_at	224.5	P	0.00195	-1.2	-2.3	D	0.99938	0.00062	gb:AB030185.1 /DB_XREF=gi:7259239 /FEA=FLmRNA /CNT=205 /TID=Mm.29945.1 /TIER=FL+Stack /STK=108 /UG=Mm.29945 /LL=59022 /UG_GENE=Edf1 /UG_TITLE=endothelial differentiation-related factor 1 /DEF=Mus musculus mRNA, complete cds, clone:1-9. /FL=gb:BC023472.1 gb:NM_021519.1 gb:AB030185.1
1448371_at	12468.9	P	0.00024	-1.2	-2.3	D	0.99998	2e-05	gb:NM_016754.1 /DB_XREF=gi:7949077 /GEN=Mylpf /FEA=FLmRNA /CNT=238 /TID=Mm.14526.1 /TIER=FL+Stack /STK=84 /UG=Mm.14526 /LL=17907 /DEF=Mus musculus myosin light chain, phosphorylatable, fast skeletal muscle (Mylpf), mRNA. /PROD=myosin light chain, phosphorylatable, fastskeletal muscle /FL=gb:NM_016754.1 gb:U77943.1
1448483_a_at	2371.1	P	0.00024	-1.2	-2.3	D	0.99998	2e-05	gb:NM_026612.1 /DB_XREF=gi:13386095 /GEN=1810011O01Rik /FEA=FLmRNA /CNT=92 /TID=Mm.29415.1 /TIER=FL+Stack /STK=67 /UG=Mm.29415 /LL=68198 /DEF=Mus musculus RIKEN cDNA 1810011O01 gene (1810011O01Rik), mRNA. /PROD=RIKEN cDNA 1810011O01 /FL=gb:BC013510.1 gb:NM_026612.1
1448524_s_at	1152	P	0.00024	-1.2	-2.3	D	0.99997	3e-05	gb:NM_009279.1 /DB_XREF=gi:6678144 /GEN=Ssr4 /FEA=FLmRNA /CNT=148 /TID=Mm.831.1 /TIER=FL+Stack /STK=63 /UG=Mm.831 /LL=20832 /DEF=Mus musculus signal sequence receptor, delta (Ssr4), mRNA. /PROD=signal sequence receptor, delta /FL=gb:BC008172.1 gb:NM_009279.1
1448530_at	1777.5	P	0.00195	-1.2	-2.3	D	0.99945	0.00055	gb:NM_025508.1 /DB_XREF=gi:17975499 /GEN=Gmpr /FEA=FLmRNA /CNT=110 /TID=Mm.25808.1 /TIER=FL+Stack /STK=63 /UG=Mm.25808 /LL=66355 /DEF=Mus musculus guanosine monophosphate reductase (Gmpr), mRNA. /PROD=guanosine monophosphate reductase /FL=gb:BC010827.1 gb:NM_025508.1
1448540_a_at	678.4	P	0.00073	-1.2	-2.3	D	0.99951	0.00049	gb:BC021536.1 /DB_XREF=gi:18204854 /FEA=FLmRNA /CNT=112 /TID=Mm.41683.1 /TIER=FL+Stack /STK=60 /UG=Mm.41683 /LL=106264 /UG_GENE=0610012G03Rik /DEF=Mus musculus, Similar to RIKEN cDNA 0610012G03 gene, clone MGC:35773 IMAGE:5352549, mRNA, complete cds. /PROD=Similar to RIKEN cDNA 0610012G03 gene /FL=gb:BC021536.1 gb:NM_025320.1
1449218_at	1940.4	P	0.00195	-1.2	-2.3	D	0.99951	0.00049	gb:NM_007751.1 /DB_XREF=gi:6680994 /GEN=Cox8b /FEA=FLmRNA /CNT=27 /TID=Mm.3841.1 /TIER=FL+Stack /STK=18 /UG=Mm.3841 /LL=12869 /DEF=Mus musculus cytochrome c oxidase, subunit VIIIb (Cox8b), mRNA. /PROD=cytochrome c oxidase, subunit VIIIb /FL=gb:U15541.1 gb:NM_007751.1
1449255_a_at	5980	P	0.00024	-1.2	-2.3	D	0.99997	3e-05	gb:NM_025586.1 /DB_XREF=gi:13385035 /GEN=2510008H07Rik /FEA=FLmRNA /CNT=122 /TID=Mm.2050.1 /TIER=FL+Stack /STK=16 /UG=Mm.2050 /LL=66480 /DEF=Mus musculus RIKEN cDNA 2510008H07 gene (2510008H07Rik), mRNA. /PROD=RIKEN cDNA 2510008H07 /FL=gb:NM_025586.1
1449256_a_at	463.7	P	0.00024	-1.2	-2.3	D	0.99951	0.00049	gb:BC010722.1 /DB_XREF=gi:14715108 /FEA=FLmRNA /CNT=155 /TID=Mm.1387.1 /TIER=FL+Stack /STK=16 /UG=Mm.1387 /LL=53869 /UG_GENE=Rab11a /DEF=Mus musculus, RAB11A, member RAS oncogene family, clone MGC:6317 IMAGE:2811973, mRNA, complete cds. /PROD=RAB11A, member RAS oncogene family /FL=gb:BC010722.1 gb:NM_017382.1
1449338_at	396.9	P	0.00122	-1.2	-2.3	D	0.99991	9e-05	gb:BC025117.1 /DB_XREF=gi:19264026 /FEA=FLmRNA /CNT=85 /TID=Mm.21793.1 /TIER=FL+Stack /STK=13 /UG=Mm.21793 /LL=66363 /UG_GENE=2310005G07Rik /DEF=Mus musculus, RIKEN cDNA 2310005G07 gene, clone MGC:35747 IMAGE:3984181, mRNA, complete cds. /PROD=RIKEN cDNA 2310005G07 gene /FL=gb:NM_025514.1 gb:BC025117.1
1449383_at	6327.8	P	0.00024	-1.2	-2.3	D	0.99956	0.00044	gb:NM_007421.1 /DB_XREF=gi:6671518 /GEN=Adss1 /FEA=FLmRNA /CNT=34 /TID=Mm.3440.1 /TIER=FL+Stack /STK=12 /UG=Mm.3440 /LL=11565 /DEF=Mus musculus adenylosuccinate synthetase 1, muscle (Adss1), mRNA. /PROD=adenylosuccinate synthetase 1, muscle /FL=gb:M74495.1 gb:NM_007421.1
1449398_at	6152.4	P	0.00024	-1.2	-2.3	D	0.99965	0.00035	gb:NM_025425.1 /DB_XREF=gi:13384819 /GEN=1110057H16Rik /FEA=FLmRNA /CNT=15 /TID=Mm.46198.1 /TIER=FL+Stack /STK=12 /UG=Mm.46198 /LL=66211 /DEF=Mus musculus RIKEN cDNA 1110057H16 gene (1110057H16Rik), mRNA. /PROD=RIKEN cDNA 1110057H16 /FL=gb:NM_025425.1
1450118_a_at	14586.7	P	0.00024	-1.2	-2.3	D	0.99969	0.00031	gb:NM_011620.1 /DB_XREF=gi:6755844 /GEN=Tnnt3 /FEA=FLmRNA /CNT=14 /TID=Mm.14546.1 /TIER=FL /STK=2 /UG=Mm.14546 /LL=21957 /DEF=Mus musculus troponin T3, skeletal, fast (Tnnt3), mRNA. /PROD=troponin T3, skeletal, fast /FL=gb:L49018.1 gb:L48991.1 gb:L48990.1 gb:L48989.1 gb:L48988.1 gb:U77779.1 gb:NM_011620.1
1450432_s_at	217.9	P	0.00806	-1.2	-2.3	D	0.99903	0.00097	gb:AF425647.1 /DB_XREF=gi:16755673 /GEN=Mus81 /FEA=FLmRNA /CNT=25 /TID=Mm.27697.1 /TIER=FL /STK=1 /UG=Mm.27697 /LL=71711 /DEF=Mus musculus MUS81 endonuclease (Mus81) mRNA, complete cds. /PROD=MUS81 endonuclease /FL=gb:NM_027877.1 gb:AF425647.1 gb:BC026560.1
1450449_a_at	2781.4	P	0.00024	-1.2	-2.3	D	0.99997	4e-05	gb:NM_021430.1 /DB_XREF=gi:10946795 /GEN=2900002H16Rik /FEA=FLmRNA /CNT=24 /TID=Mm.41180.1 /TIER=FL /STK=1 /UG=Mm.41180 /LL=75695 /DEF=Mus musculus RIKEN cDNA 2900002H16 gene (2900002H16Rik), mRNA. /PROD=RIKEN cDNA 2900002H16 /FL=gb:NM_021430.1
1450848_at	679.2	P	0.01856	-1.2	-2.3	D	0.99983	0.00017	gb:AK014889.1 /DB_XREF=gi:12852993 /GEN=Dap3 /FEA=FLmRNA /CNT=197 /TID=Mm.29028.1 /TIER=Stack /STK=94 /UG=Mm.29028 /LL=65111 /UG_TITLE=death associated protein 3 /DEF=Mus musculus adult male testis cDNA, RIKEN full-length enriched library, clone:4921514D13:death associated protein 3, full insert sequence. /FL=gb:NM_022994.1 gb:BC019566.1
1450968_at	6330.4	P	0.00122	-1.2	-2.3	D	0.99979	0.00021	gb:AK003966.1 /DB_XREF=gi:12834944 /FEA=FLmRNA /CNT=375 /TID=Mm.181933.1 /TIER=Stack /STK=8 /UG=Mm.181933 /LL=66694 /UG_GENE=4430402G14Rik /UG_TITLE=RIKEN cDNA 4430402G14 gene /DEF=Mus musculus 18 days embryo whole body cDNA, RIKEN full-length enriched library, clone:1110030B05:homolog to UBIQUINOL-CYTOCHROME C REDUCTASE IRON-SULFUR SUBUNIT, MITOCHONDRIAL PRECURSOR (EC 1.10.2.2) (RIESKE IRON-SULF…
1450970_at	3724.7	P	0.00024	-1.2	-2.3	D	0.99995	5e-05	gb:AA792094 /DB_XREF=gi:2855049 /DB_XREF=vp47c04.r1 /CLONE=IMAGE:1079814 /FEA=FLmRNA /CNT=188 /TID=Mm.19039.1 /TIER=Stack /STK=8 /UG=Mm.19039 /LL=14718 /UG_GENE=Got1 /UG_TITLE=glutamate oxaloacetate transaminase 1, soluble /FL=gb:J02623.1 gb:BC002057.1 gb:NM_010324.1
1451148_at	5280	P	0.00024	-1.2	-2.3	D	0.99996	4e-05	gb:AF316872.1 /DB_XREF=gi:13492049 /FEA=FLmRNA /CNT=233 /TID=Mm.18539.1 /TIER=FL+Stack /STK=91 /UG=Mm.18539 /LL=68943 /UG_GENE=1190006F07Rik /DEF=Mus musculus protein kinase BRPK mRNA, complete cds. /PROD=protein kinase BRPK /FL=gb:AB053476.1 gb:AF316872.1
1451149_at	3941.9	P	0.00024	-1.2	-2.3	D	0.99998	2e-05	gb:BC008527.1 /DB_XREF=gi:14250209 /FEA=FLmRNA /CNT=180 /TID=Mm.22403.1 /TIER=FL+Stack /STK=90 /UG=Mm.22403 /LL=72157 /UG_GENE=2610020G18Rik /DEF=Mus musculus, RIKEN cDNA 2610020G18 gene, clone MGC:6642 IMAGE:3495694, mRNA, complete cds. /PROD=RIKEN cDNA 2610020G18 gene /FL=gb:BC008527.1
1451302_at	330	P	0.00024	-1.2	-2.3	D	0.99996	4e-05	gb:BC024574.1 /DB_XREF=gi:19353833 /FEA=FLmRNA /CNT=70 /TID=Mm.41567.1 /TIER=FL+Stack /STK=40 /UG=Mm.41567 /LL=68618 /UG_GENE=1110012L19Rik /DEF=Mus musculus, RIKEN cDNA 1110012L19 gene, clone MGC:37675 IMAGE:5042031, mRNA, complete cds. /PROD=RIKEN cDNA 1110012L19 gene /FL=gb:BC024574.1
1451312_at	5125.7	P	0.00024	-1.2	-2.3	D	0.99993	7e-05	gb:BC013503.1 /DB_XREF=gi:15488720 /FEA=FLmRNA /CNT=67 /TID=Mm.28712.1 /TIER=FL+Stack /STK=38 /UG=Mm.28712 /LL=75406 /UG_GENE=1010001M04Rik /DEF=Mus musculus, RIKEN cDNA 1010001M04 gene, clone MGC:19170 IMAGE:4223916, mRNA, complete cds. /PROD=RIKEN cDNA 1010001M04 gene /FL=gb:BC013503.1
1451385_at	1465.1	P	0.00073	-1.2	-2.3	D	0.99976	0.00024	gb:BC010826.1 /DB_XREF=gi:14789926 /FEA=FLmRNA /CNT=78 /TID=Mm.26792.1 /TIER=FL+Stack /STK=27 /UG=Mm.26792 /LL=70186 /UG_GENE=2310056P07Rik /DEF=Mus musculus, RIKEN cDNA 2310056P07 gene, clone MGC:19151 IMAGE:4219531, mRNA, complete cds. /PROD=RIKEN cDNA 2310056P07 gene /FL=gb:BC010826.1
1452044_at	2802	P	0.00586	-1.2	-2.3	D	0.99931	0.00069	gb:BG796960 /DB_XREF=gi:14132530 /DB_XREF=UTSW_SM7C2 /CLONE=UTSW_SM7C2 /FEA=FLmRNA /CNT=102 /TID=Mm.27665.1 /TIER=Stack /STK=44 /UG=Mm.27665 /LL=74192 /UG_GENE=2010015J01Rik /UG_TITLE=RIKEN cDNA 2010015J01 gene /FL=gb:BC024482.1
1452141_a_at	2711.2	P	0.00024	-1.2	-2.3	D	0.99998	2e-05	gb:BC001991.1 /DB_XREF=gi:12805068 /FEA=mRNA /CNT=449 /TID=Mm.22699.2 /TIER=Stack /STK=195 /UG=Mm.22699 /LL=20363 /UG_GENE=Sepp1 /UG_TITLE=selenoprotein P, plasma, 1 /DEF=Mus musculus, Similar to selenoprotein P, plasma, 1, clone IMAGE:3486761, mRNA.
1452184_at	3021.8	P	0.00073	-1.2	-2.3	D	0.99991	9e-05	gb:W29413 /DB_XREF=gi:1309560 /DB_XREF=mb98f12.r1 /CLONE=IMAGE:337487 /FEA=mRNA /CNT=173 /TID=Mm.4537.1 /TIER=Stack /STK=73 /UG=Mm.4537 /LL=66218 /UG_GENE=Ndufb9 /UG_TITLE=NADH dehydrogenase (ubiquinone) 1 beta subcomplex, 9
1452203_at	272.8	P	0.00073	-1.2	-2.3	D	0.99914	0.00087	gb:BC027371.1 /DB_XREF=gi:20071810 /FEA=mRNA /CNT=142 /TID=Mm.196290.1 /TIER=Stack /STK=62 /UG=Mm.196290 /LL=73960 /UG_GENE=4930434H03Rik /DEF=Mus musculus, Similar to RIKEN cDNA 4930434H03 gene, clone IMAGE:4954817, mRNA, partial cds. /PROD=Similar to RIKEN cDNA 4930434H03 gene
1452272_a_at	449.3	P	0.01416	-1.2	-2.3	D	0.99914	0.00087	gb:BI901126 /DB_XREF=gi:16188886 /DB_XREF=id18e05.x1 /CLONE=IMAGE:5663696 /FEA=mRNA /CNT=70 /TID=Mm.28124.2 /TIER=Stack /STK=23 /UG=Mm.28124 /LL=11692 /UG_GENE=Gfer /UG_TITLE=growth factor, erv1 (S. cerevisiae)-like (augmenter of liver regeneration)
1452680_at	1176.9	P	0.00195	-1.2	-2.3	D	0.99991	9e-05	gb:BQ043840 /DB_XREF=gi:19793923 /DB_XREF=UI-M-EF0-buk-l-21-0-UI.r1 /CLONE=IMAGE:5683364 /FEA=mRNA /CNT=185 /TID=Mm.29135.1 /TIER=Stack /STK=91 /UG=Mm.29135 /LL=107686 /UG_GENE=Snrpd2 /UG_TITLE=small nuclear ribonucleoprotein D2
1452692_a_at	5951.2	P	0.00024	-1.2	-2.3	D	0.99987	0.00013	gb:BI692577 /DB_XREF=gi:15655206 /DB_XREF=603343427F1 /CLONE=IMAGE:5371014 /FEA=mRNA /CNT=150 /TID=Mm.2206.1 /TIER=Stack /STK=79 /UG=Mm.2206 /LL=72900 /UG_GENE=Ndufv2 /UG_TITLE=NADH dehydrogenase (ubiquinone) flavoprotein 2
1452701_x_at	4114.6	P	0.00073	-1.2	-2.3	D	0.99945	0.00055	gb:BF237074 /DB_XREF=gi:11150991 /DB_XREF=602027417F1 /CLONE=IMAGE:4162469 /FEA=mRNA /CNT=176 /TID=Mm.43005.2 /TIER=Stack /STK=74 /UG=Mm.43005 /LL=22186 /UG_GENE=Uba52 /UG_TITLE=ubiquitin A-52 residue ribosomal protein fusion product 1
1452790_x_at	7779.9	P	0.00024	-1.2	-2.3	D	0.99998	2e-05	gb:AV048277 /DB_XREF=gi:16380565 /DB_XREF=AV048277 /CLONE=1810004C04 /FEA=mRNA /CNT=85 /TID=Mm.30150.1 /TIER=Stack /STK=40 /UG=Mm.30150 /LL=66091 /UG_GENE=1010001M12Rik /UG_TITLE=RIKEN cDNA 1010001M12 gene
1452919_a_at	856.6	P	0.00073	-1.2	-2.3	D	0.99965	0.00035	gb:W59405 /DB_XREF=gi:1366171 /DB_XREF=md80g02.r1 /CLONE=IMAGE:374738 /FEA=mRNA /CNT=84 /TID=Mm.28541.1 /TIER=Stack /STK=10 /UG=Mm.28541 /LL=67078 /UG_GENE=1700012G19Rik /UG_TITLE=RIKEN cDNA 1700012G19 gene
1453206_at	232.3	P	0.01416	-1.2	-2.3	D	0.99945	0.00055	gb:AV235115 /DB_XREF=gi:16386190 /DB_XREF=AV235115 /CLONE=4732402K02 /FEA=mRNA /CNT=184 /TID=Mm.28558.1 /TIER=Stack /STK=13 /UG=Mm.28558 /LL=67022 /UG_GENE=2600017P15Rik /UG_TITLE=RIKEN cDNA 2600017P15 gene
1453362_x_at	1143.3	P	0.00073	-1.2	-2.3	D	0.99973	0.00027	gb:AK008386.1 /DB_XREF=gi:12842539 /GEN=Rps24 /FEA=mRNA /CNT=13 /TID=Mm.16775.5 /TIER=ConsEnd /STK=4 /UG=Mm.16775 /LL=20088 /UG_TITLE=ribosomal protein S24 /DEF=Mus musculus adult male small intestine cDNA, RIKEN full-length enriched library, clone:2010110L03:ribosomal protein S24, full insert sequence.
1454611_a_at	3141.1	P	0.00024	-1.2	-2.3	D	0.99997	3e-05	gb:BB058862 /DB_XREF=gi:8466010 /DB_XREF=BB058862 /CLONE=7120483M17 /FEA=EST /CNT=167 /TID=Mm.34246.2 /TIER=Stack /STK=152 /UG=Mm.34246 /LL=12313 /UG_GENE=Calm1 /UG_TITLE=calmodulin 1
1454640_at	375.3	P	0.00195	-1.2	-2.3	D	0.99991	9e-05	gb:BI692256 /DB_XREF=gi:15654885 /DB_XREF=603342722F1 /CLONE=IMAGE:5370748 /FEA=EST /CNT=129 /TID=Mm.27406.1 /TIER=Stack /STK=105 /UG=Mm.27406 /UG_TITLE=ESTs, Moderately similar to hypothetical protein MGC2217 (Homo sapiens) (H.sapiens)
1454716_x_at	7836	P	0.00024	-1.2	-2.3	D	0.99989	0.00011	gb:AA960638 /DB_XREF=gi:3126538 /DB_XREF=ub60a11.s1 /CLONE=IMAGE:1382108 /FEA=EST /CNT=78 /TID=Mm.180182.2 /TIER=Stack /STK=63 /UG=Mm.180182 /LL=12859 /UG_GENE=Cox5b /UG_TITLE=cytochrome c oxidase, subunit Vb
1455077_a_at	4033.1	P	0.00024	-1.2	-2.3	D	0.99995	5e-05	gb:AU042749 /DB_XREF=gi:3956984 /DB_XREF=AU042749 /CLONE=J1029B02 /FEA=EST /CNT=31 /TID=Mm.196508.4 /TIER=Stack /STK=26 /UG=Mm.196508 /LL=21761 /UG_GENE=Tex189 /UG_TITLE=testis expressed gene 189
1455168_a_at	4112.6	P	0.00024	-1.2	-2.3	D	0.99983	0.00017	gb:BM210111 /DB_XREF=gi:17766832 /DB_XREF=C0659C02-3 /CLONE=C0659C02 /FEA=EST /CNT=26 /TID=Mm.5305.2 /TIER=Stack /STK=22 /UG=Mm.5305 /LL=14694 /UG_GENE=Gnb2-rs1 /UG_TITLE=guanine nucleotide binding protein, beta 2, related sequence 1
1455662_x_at	4189.5	P	0.00073	-1.2	-2.3	D	0.9999	0.0001	gb:AV117525 /DB_XREF=gi:5299676 /DB_XREF=AV117525 /CLONE=2610203J23 /FEA=EST /CNT=14 /TID=Mm.42767.3 /TIER=Stack /STK=9 /UG=Mm.42767 /LL=20068 /UG_GENE=Rps17 /UG_TITLE=ribosomal protein S17
1455752_a_at	632.4	P	0.00024	-1.2	-2.3	D	0.99976	0.00024	gb:BF681820 /DB_XREF=gi:11955715 /DB_XREF=602117631F1 /CLONE=IMAGE:3468870 /FEA=EST /CNT=11 /TID=Mm.29269.6 /TIER=Stack /STK=8 /UG=Mm.29269 /LL=66990 /UG_GENE=2410001H17Rik /UG_TITLE=RIKEN cDNA 2410001H17 gene
1455806_x_at	7722.6	P	0.00024	-1.2	-2.3	D	0.9999	0.0001	gb:AV124207 /DB_XREF=gi:5310441 /DB_XREF=AV124207 /CLONE=2700017A03 /FEA=EST /CNT=64 /TID=Mm.27886.4 /TIER=Stack /STK=63 /UG=Mm.27886 /LL=66414 /UG_GENE=2410011G03Rik /UG_TITLE=RIKEN cDNA 2410011G03 gene
1455911_x_at	5990.9	P	0.00024	-1.2	-2.3	D	0.99994	6e-05	gb:AV065861 /DB_XREF=gi:5185689 /DB_XREF=AV065861 /CLONE=2010104I23 /FEA=EST /CNT=27 /TID=Mm.30084.4 /TIER=Stack /STK=27 /UG=Mm.30084 /LL=104130 /UG_GENE=Np15 /UG_TITLE=nuclear protein 15.6
1455997_a_at	12434.6	P	0.00024	-1.2	-2.3	D	0.99997	3e-05	gb:AV214853 /DB_XREF=gi:6155699 /DB_XREF=AV214853 /CLONE=2410141M17 /FEA=EST /CNT=23 /TID=Mm.24805.2 /TIER=Stack /STK=20 /UG=Mm.24805 /LL=67530 /UG_GENE=2210415M14Rik /UG_TITLE=RIKEN cDNA 2210415M14 gene
1456580_s_at	5450.7	P	0.00024	-1.2	-2.3	D	0.99998	2e-05	gb:AV019894 /DB_XREF=gi:4796886 /DB_XREF=AV019894 /CLONE=1190012E06 /FEA=EST /CNT=9 /TID=Mm.22514.3 /TIER=Stack /STK=9 /UG=Mm.22514 /LL=66043 /UG_GENE=0610008F14Rik /UG_TITLE=RIKEN cDNA 0610008F14 gene
1456695_x_at	6518.6	P	0.00024	-1.2	-2.3	D	0.99997	3e-05	gb:BF720337 /DB_XREF=gi:12021339 /DB_XREF=mab52d11.y1 /CLONE=IMAGE:3974060 /FEA=EST /CNT=9 /TID=Mm.45312.8 /TIER=Stack /STK=8 /UG=Mm.45312 /LL=59008 /UG_GENE=Anapc5 /UG_TITLE=anaphase-promoting complex subunit 5
1459986_a_at	6145.3	P	0.00073	-1.2	-2.3	D	0.99998	2e-05	gb:NM_009092.1 /DB_XREF=gi:6677800 /GEN=Rps17 /FEA=FLmRNA /CNT=329 /TID=Mm.42767.1 /TIER=FL+Stack /STK=174 /UG=Mm.42767 /LL=20068 /DEF=Mus musculus ribosomal protein S17 (Rps17), mRNA. /PROD=ribosomal protein S17 /FL=gb:NM_009092.1 gb:BC002044.1 gb:D25213.1
1460196_at	251.9	P	0.00073	-1.2	-2.3	D	0.99945	0.00055	gb:NM_007620.1 /DB_XREF=gi:6671689 /GEN=Cbr1 /FEA=FLmRNA /CNT=120 /TID=Mm.26940.1 /TIER=FL+Stack /STK=62 /UG=Mm.26940 /LL=12408 /DEF=Mus musculus carbonyl reductase 1 (Cbr1), mRNA. /PROD=carbonyl reductase /FL=gb:BC012714.1 gb:U31966.1 gb:NM_007620.1
1460308_a_at	492.6	P	0.01416	-1.2	-2.3	D	0.99973	0.00027	gb:NM_026729.1 /DB_XREF=gi:19387847 /GEN=Ict1 /FEA=FLmRNA /CNT=7 /TID=Mm.41541.1 /TIER=FL /STK=1 /UG=Mm.41541 /LL=68572 /DEF=Mus musculus immature colon carcinoma transcript 1 (Ict1), mRNA. /PROD=immature colon carcinoma transcript 1 /FL=gb:NM_026729.1
1460400_at	535.4	P	0.00024	-1.2	-2.3	D	0.99997	3e-05	gb:AK007793.1 /DB_XREF=gi:12841565 /GEN=Spg4 /FEA=mRNA /CNT=83 /TID=Mm.19804.1 /TIER=Stack /STK=40 /UG=Mm.19804 /LL=50850 /UG_TITLE=spastic paraplegia 4 homolog (human) /DEF=Mus musculus 10 day old male pancreas cDNA, RIKEN full-length enriched library, clone:1810046H01:spastic paraplegia 4 homolog (human), full insert sequence.
1460543_x_at	1894.8	P	0.00024	-1.2	-2.3	D	0.99997	3e-05	gb:AV066985 /DB_XREF=gi:5186813 /DB_XREF=AV066985 /CLONE=2010200H23 /FEA=EST /CNT=110 /TID=Mm.21529.3 /TIER=Stack /STK=101 /UG=Mm.21529 /LL=19981 /UG_GENE=Rpl37a /UG_TITLE=ribosomal protein L37a
1460561_x_at	8473.5	P	0.00024	-1.2	-2.3	D	0.99995	5e-05	gb:BB464434 /DB_XREF=gi:9381623 /DB_XREF=BB464434 /CLONE=D130091O17 /FEA=EST /CNT=39 /TID=Mm.42829.2 /TIER=Stack /STK=38 /UG=Mm.42829 /LL=20364 /UG_GENE=Sepw1 /UG_TITLE=selenoprotein W, muscle 1
1460660_x_at	602.6	A	0.30371	-1.2	-2.3	D	0.99951	0.00049	gb:NM_026395.1 /DB_XREF=gi:13385881 /GEN=1110060F11Rik /FEA=FLmRNA /CNT=11 /TID=Mm.4859.1 /TIER=FL /STK=4 /UG=Mm.4859 /LL=67830 /DEF=Mus musculus RIKEN cDNA 1110060F11 gene (1110060F11Rik), mRNA. /PROD=RIKEN cDNA 1110060F11 /FL=gb:NM_026395.1
1460678_at	968	P	0.00024	-1.2	-2.3	D	0.99951	0.00049	gb:BC005581.1 /DB_XREF=gi:13542752 /FEA=FLmRNA /CNT=109 /TID=Mm.28047.1 /TIER=FL+Stack /STK=33 /UG=Mm.28047 /LL=69554 /UG_GENE=2310022K15Rik /DEF=Mus musculus, RIKEN cDNA 2310022K15 gene, clone MGC:11736 IMAGE:3968615, mRNA, complete cds. /PROD=RIKEN cDNA 2310022K15 gene /FL=gb:BC005581.1
AFFX-DapX-3_at	861.5	P	8e-05	-1.3	-2.46	D	1	0	L38424 B subtilis dapB, jojF, jojG genes corresponding to nucleotides 1358-3197 of L38424 (-5, -M, -3 represent transcript regions 5 prime, Middle, and 3 prime respectively)
AFFX-r2-Bs-dap-M_at	374.4	P	0.00024	-1.3	-2.46	D	0.99976	0.00024	B. subtilis /GEN=dapB, jojF /DB_XREF=gb:L38424.1 /NOTE=SIF corresponding to nucleotides 2055-2578 of gb:L38424.1 /DEF=Bacillus subtilis dihydropicolinate reductase (jojE) gene, complete cds; poly(A) polymerase (jojI) gene, complete cds; biotin acetyl-CoA-carboxylase ligase (birA) gene, complete cds; jojC, jojD, jojF, jojG, jojH genes, complete cds s.
AFFX-r2-Bs-dap-3_at	955.5	P	0.00073	-1.3	-2.46	D	0.99997	3e-05	B. subtilis /GEN=jojG /DB_XREF=gb:L38424.1 /NOTE=SIF corresponding to nucleotides 2634-3089 of gb:L38424.1 /DEF=Bacillus subtilis dihydropicolinate reductase (jojE) gene, complete cds; poly(A) polymerase (jojI) gene, complete cds; biotin acetyl-CoA-carboxylase ligase (birA) gene, complete cds; jojC, jojD, jojF, jojG, jojH genes, complete cds s.
1415678_at	2709.6	P	0.00024	-1.3	-2.46	D	0.99998	2e-05	gb:BC008595.1 /DB_XREF=gi:14250330 /FEA=FLmRNA /CNT=154 /TID=Mm.3766.1 /TIER=FL+Stack /STK=52 /UG=Mm.3766 /LL=19042 /UG_GENE=Ppm1a /DEF=Mus musculus, protein phosphatase 1A, magnesium dependent, alpha isoform, clone MGC:6077 IMAGE:3581897, mRNA, complete cds. /PROD=protein phosphatase 1A, magnesium dependent,alpha isoform /FL=gb:NM_008910.1 gb:D28117.1 gb:BC008595.1
1415704_a_at	2430	P	0.00024	-1.3	-2.46	D	0.99983	0.00017	gb:AF320340.1 /DB_XREF=gi:16901487 /FEA=FLmRNA /CNT=16 /TID=Mm.29076.2 /TIER=FL /STK=1 /UG=Mm.29076 /LL=77007 /UG_GENE=2510010F10Rik /DEF=Mus musculus CDV-3B mRNA, complete cds, alternatively spliced. /PROD=CDV-3B /FL=gb:AB046372.1 gb:AF320340.1
1415753_at	622.1	P	0.00024	-1.3	-2.46	D	0.99994	6e-05	gb:BC005632.1 /DB_XREF=gi:13542873 /FEA=FLmRNA /CNT=155 /TID=Mm.29802.1 /TIER=FL+Stack /STK=69 /UG=Mm.29802 /DEF=Mus musculus, Similar to CGI-67 protein, clone MGC:11699 IMAGE:3964094, mRNA, complete cds. /PROD=Similar to CGI-67 protein /FL=gb:BC005632.1
1415768_a_at	1965.5	P	0.00024	-1.3	-2.46	D	0.99995	5e-05	gb:AV054417 /DB_XREF=gi:5154164 /DB_XREF=AV054417 /CLONE=1810030J15 /FEA=EST /CNT=11 /TID=Mm.30272.3 /TIER=Stack /STK=10 /UG=Mm.30272 /LL=67615 /UG_GENE=1200003M11Rik /UG_TITLE=RIKEN cDNA 1200003M11 gene
1415897_a_at	529.4	P	0.00024	-1.3	-2.46	D	0.99903	0.00097	gb:BC009155.1 /DB_XREF=gi:14318724 /FEA=FLmRNA /CNT=448 /TID=Mm.14796.1 /TIER=FL+Stack /STK=177 /UG=Mm.14796 /LL=56615 /UG_GENE=Mgst1 /DEF=Mus musculus, RIKEN cDNA 1500002K10 gene, clone MGC:6549 IMAGE:2655738, mRNA, complete cds. /PROD=RIKEN cDNA 1500002K10 gene /FL=gb:NM_019946.1 gb:BC009155.1 gb:AF159050.1
1415912_a_at	696.8	P	0.00195	-1.3	-2.46	D	0.99961	0.00039	gb:NM_026533.1 /DB_XREF=gi:13386033 /GEN=Rps13 /FEA=FLmRNA /CNT=343 /TID=Mm.14798.1 /TIER=FL+Stack /STK=170 /UG=Mm.14798 /LL=68052 /DEF=Mus musculus ribosomal protein S13 (Rps13), mRNA. /PROD=ribosomal protein S13 /FL=gb:NM_026533.1 gb:BC011192.1
1415962_at	1993.5	P	0.00024	-1.3	-2.46	D	0.99997	3e-05	gb:NM_080635.1 /DB_XREF=gi:18079340 /GEN=Eif3s3 /FEA=FLmRNA /CNT=320 /TID=Mm.183083.1 /TIER=FL+Stack /STK=157 /UG=Mm.183083 /LL=68135 /DEF=Mus musculus eukaryotic translation initiation factor 3, subunit 3 (gamma, 40kD) (Eif3s3), mRNA. /PROD=eukaryotic translation initiation factor 3,subunit 3 (gamma, 40kD) /FL=gb:BC014755.1 gb:NM_080635.1
1415970_at	5646.3	P	0.00195	-1.3	-2.46	D	0.99998	2e-05	gb:NM_053071.1 /DB_XREF=gi:16716342 /GEN=Cox6c /FEA=FLmRNA /CNT=253 /TID=Mm.548.1 /TIER=FL+Stack /STK=155 /UG=Mm.548 /LL=12864 /DEF=Mus musculus cytochrome c oxidase, subunit VIc (Cox6c), mRNA. /PROD=cytochrome c oxidase, subunit VIc /FL=gb:BC024666.1 gb:NM_053071.1
1416041_at	2755.3	P	0.00024	-1.3	-2.46	D	0.99976	0.00024	gb:NM_011361.1 /DB_XREF=gi:6755489 /GEN=Sgk /FEA=FLmRNA /CNT=280 /TID=Mm.28405.1 /TIER=FL+Stack /STK=139 /UG=Mm.28405 /LL=20393 /DEF=Mus musculus serumglucocorticoid regulated kinase (Sgk), mRNA. /PROD=serumglucocorticoid regulated kinase /FL=gb:NM_011361.1 gb:AF205855.1 gb:AF139638.1 gb:BC005720.1
1416284_at	320.1	P	0.00415	-1.3	-2.46	D	0.99995	5e-05	gb:NM_024227.1 /DB_XREF=gi:13195649 /GEN=1110015G04Rik /FEA=FLmRNA /CNT=160 /TID=Mm.27332.1 /TIER=FL+Stack /STK=102 /UG=Mm.27332 /LL=68611 /DEF=Mus musculus RIKEN cDNA 1110015G04 gene (1110015G04Rik), mRNA. /PROD=RIKEN cDNA 1110015G04 /FL=gb:NM_024227.1 gb:BC002293.1 gb:BC005797.1
1416381_a_at	1606.1	P	0.00024	-1.3	-2.46	D	0.99951	0.00049	gb:BC008174.1 /DB_XREF=gi:14198230 /FEA=FLmRNA /CNT=239 /TID=Mm.193042.1 /TIER=FL+Stack /STK=93 /UG=Mm.193042 /LL=54683 /UG_GENE=Prdx6 /DEF=Mus musculus, clone MGC:5643 IMAGE:3481713, mRNA, complete cds. /PROD=Unknown (protein for MGC:5643) /FL=gb:AF110733.1 gb:AF197951.1 gb:AF124994.1 gb:BC008174.1 gb:NM_012021.1
1416394_at	2304.6	P	0.00024	-1.3	-2.46	D	0.99998	2e-05	gb:NM_009736.1 /DB_XREF=gi:6753159 /GEN=Bag1 /FEA=FLmRNA /CNT=184 /TID=Mm.688.1 /TIER=FL+Stack /STK=92 /UG=Mm.688 /LL=12017 /DEF=Mus musculus Bcl2-associated athanogene 1 (Bag1), mRNA. /PROD=Bcl2-associated athanogene 1 /FL=gb:AF022223.1 gb:BC003722.1 gb:NM_009736.1
1416520_x_at	1708.5	P	0.00024	-1.3	-2.46	D	0.99998	2e-05	gb:NM_018730.1 /DB_XREF=gi:9055321 /GEN=Rpl36 /FEA=FLmRNA /CNT=174 /TID=Mm.11376.1 /TIER=FL+Stack /STK=83 /UG=Mm.11376 /LL=54217 /DEF=Mus musculus ribosomal protein L36 (Rpl36), mRNA. /PROD=ribosomal protein L36 /FL=gb:NM_018730.1 gb:BC021595.1
1416635_at	822.9	P	0.00073	-1.3	-2.46	D	0.99998	2e-05	gb:NM_020561.1 /DB_XREF=gi:10181129 /GEN=Asml3a-pending /FEA=FLmRNA /CNT=127 /TID=Mm.2379.1 /TIER=FL+Stack /STK=77 /UG=Mm.2379 /LL=57319 /DEF=Mus musculus acid sphingomyelinase-like phosphodiesterase 3a (Asml3a-pending), mRNA. /PROD=acid sphingomyelinase-like phosphodiesterase 3a /FL=gb:NM_020561.1
1416665_at	1285.4	P	0.00073	-1.3	-2.46	D	0.99989	0.00011	gb:AF098949.1 /DB_XREF=gi:5456748 /FEA=FLmRNA /CNT=98 /TID=Mm.20634.1 /TIER=FL+Stack /STK=75 /UG=Mm.20634 /LL=12850 /UG_GENE=Coq7 /DEF=Mus musculus COQ7 protein mRNA, complete cds. /PROD=COQ7 protein /FL=gb:AF098949.1 gb:NM_009940.1 gb:AF053770.1 gb:AF080580.1
1416824_at	1912.6	P	0.00024	-1.3	-2.46	D	0.99994	6e-05	gb:NM_026592.1 /DB_XREF=gi:13386077 /GEN=B230118H07Rik /FEA=FLmRNA /CNT=99 /TID=Mm.157502.1 /TIER=FL+Stack /STK=68 /UG=Mm.157502 /LL=68170 /DEF=Mus musculus RIKEN cDNA B230118H07 gene (B230118H07Rik), mRNA. /PROD=RIKEN cDNA B230118H07 /FL=gb:NM_026592.1 gb:BC025075.1
1416834_x_at	1073.1	P	0.00073	-1.3	-2.46	D	0.99991	9e-05	gb:NM_026612.1 /DB_XREF=gi:13386095 /GEN=1810011O01Rik /FEA=FLmRNA /CNT=92 /TID=Mm.29415.1 /TIER=FL+Stack /STK=67 /UG=Mm.29415 /LL=68198 /DEF=Mus musculus RIKEN cDNA 1810011O01 gene (1810011O01Rik), mRNA. /PROD=RIKEN cDNA 1810011O01 /FL=gb:BC013510.1 gb:NM_026612.1
1416910_at	1053.7	P	0.00024	-1.3	-2.46	D	0.99951	0.00049	gb:NM_025384.1 /DB_XREF=gi:13384759 /GEN=1110003P16Rik /FEA=FLmRNA /CNT=103 /TID=Mm.27692.1 /TIER=FL+Stack /STK=64 /UG=Mm.27692 /LL=66148 /DEF=Mus musculus RIKEN cDNA 1110003P16 gene (1110003P16Rik), mRNA. /PROD=RIKEN cDNA 1110003P16 /FL=gb:NM_025384.1
1417053_at	1059.1	P	0.00024	-1.3	-2.46	D	0.99989	0.00011	gb:NM_008831.1 /DB_XREF=gi:6679298 /GEN=Phb /FEA=FLmRNA /CNT=260 /TID=Mm.2355.1 /TIER=FL+Stack /STK=58 /UG=Mm.2355 /LL=18673 /DEF=Mus musculus prohibitin (Phb), mRNA. /PROD=prohibitin /FL=gb:NM_008831.1
1417125_at	466	P	0.00024	-1.3	-2.46	D	0.99914	0.00087	gb:NM_016661.1 /DB_XREF=gi:7709979 /GEN=Ahcy /FEA=FLmRNA /CNT=239 /TID=Mm.2573.1 /TIER=FL+Stack /STK=55 /UG=Mm.2573 /LL=11615 /DEF=Mus musculus S-adenosylhomocysteine hydrolase (Ahcy), mRNA. /PROD=S-adenosylhomocysteine hydrolase /FL=gb:NM_016661.1 gb:BC015304.1 gb:L32836.1
1417212_at	693	P	0.01416	-1.3	-2.46	D	0.99998	2e-05	gb:NM_026633.1 /DB_XREF=gi:13386123 /GEN=9530058B02Rik /FEA=FLmRNA /CNT=69 /TID=Mm.34532.1 /TIER=FL+Stack /STK=53 /UG=Mm.34532 /LL=68241 /DEF=Mus musculus RIKEN cDNA 9530058B02 gene (9530058B02Rik), mRNA. /PROD=RIKEN cDNA 9530058B02 /FL=gb:BC024332.1 gb:NM_026633.1
1417290_at	290.3	A	0.09522	-1.3	-2.46	D	0.99989	0.00011	gb:NM_029796.1 /DB_XREF=gi:16418334 /GEN=Lrg-pending /FEA=FLmRNA /CNT=132 /TID=Mm.176946.1 /TIER=FL+Stack /STK=49 /UG=Mm.176946 /LL=76905 /DEF=Mus musculus leucine-rich alpha-2-glycoprotein (Lrg-pending), mRNA. /PROD=leucine-rich alpha-2-glycoprotein /FL=gb:AF403429.1 gb:AB055885.1 gb:NM_029796.1
1417365_a_at	1175.9	P	0.00024	-1.3	-2.46	D	0.99998	2e-05	gb:NM_009790.1 /DB_XREF=gi:6753243 /GEN=Calm1 /FEA=FLmRNA /CNT=323 /TID=Mm.34246.1 /TIER=FL+Stack /STK=46 /UG=Mm.34246 /LL=12313 /DEF=Mus musculus calmodulin 1 (Calm1), mRNA. /PROD=calmodulin 1 /FL=gb:NM_009790.1 gb:M19381.1
1417607_at	7972.4	P	0.00073	-1.3	-2.46	D	0.99956	0.00044	gb:NM_009943.1 /DB_XREF=gi:6753501 /GEN=Cox6a2 /FEA=FLmRNA /CNT=98 /TID=Mm.43824.1 /TIER=FL+Stack /STK=40 /UG=Mm.43824 /LL=12862 /DEF=Mus musculus cytochrome c oxidase, subunit VI a, polypeptide 2 (Cox6a2), mRNA. /PROD=cytochrome c oxidase, subunit VI a, polypeptide2 /FL=gb:U08439.1 gb:NM_009943.1
1417614_at	10111.5	P	0.00024	-1.3	-2.46	D	0.99996	4e-05	gb:NM_007710.1 /DB_XREF=gi:6671761 /GEN=Ckmm /FEA=FLmRNA /CNT=129 /TID=Mm.2375.1 /TIER=FL+Stack /STK=40 /UG=Mm.2375 /LL=12715 /DEF=Mus musculus creatine kinase, muscle (Ckmm), mRNA. /PROD=creatine kinase, muscle /FL=gb:NM_007710.1
1418117_at	358.1	P	0.00024	-1.3	-2.46	D	0.9999	0.0001	gb:BM898749 /DB_XREF=gi:19381537 /DB_XREF=UI-M-DJ0-bta-h-05-0-UI.s1 /CLONE=UI-M-DJ0-bta-h-05-0-UI /FEA=FLmRNA /CNT=98 /TID=Mm.14442.1 /TIER=ConsEnd /STK=4 /UG=Mm.14442 /LL=17993 /UG_GENE=Ndufs4 /UG_TITLE=NADH dehydrogenase (ubiquinone) Fe-S protein 4 /FL=gb:AF124785.1 gb:NM_010887.1 gb:BC004618.1
1421027_a_at	1419	P	0.00024	-1.3	-2.46	D	0.99976	0.00024	gb:NM_025282.1 /DB_XREF=gi:13384623 /GEN=Mef2c /FEA=FLmRNA /CNT=41 /TID=Mm.24001.1 /TIER=FL /STK=2 /UG=Mm.24001 /LL=17260 /DEF=Mus musculus myocyte enhancer factor 2C (Mef2c), mRNA. /PROD=myocyte enhancer factor 2C /FL=gb:NM_025282.1
1421028_a_at	551.3	P	0.00024	-1.3	-2.46	D	0.99995	5e-05	gb:AI595932 /DB_XREF=gi:4604980 /DB_XREF=uk20d09.x1 /CLONE=IMAGE:1969553 /FEA=FLmRNA /CNT=41 /TID=Mm.24001.1 /TIER=Stack /STK=16 /UG=Mm.24001 /LL=17260 /UG_GENE=Mef2c /UG_TITLE=myocyte enhancer factor 2C /FL=gb:NM_025282.1
1422407_s_at	793.3	P	0.00024	-1.3	-2.46	D	0.99981	0.00019	gb:NM_008284.1 /DB_XREF=gi:6680270 /GEN=Hras1 /FEA=FLmRNA /CNT=1 /TID=Mm.212499.1 /TIER=FL /STK=1 /UG=Mm.212499 /LL=15461 /DEF=Mus musculus Harvey rat sarcoma virus oncogene (Hras1), mRNA. /PROD=Harvey rat sarcoma virus oncogene /FL=gb:NM_008284.1
1423711_at	1090.2	P	0.00024	-1.3	-2.46	D	0.99938	0.00062	gb:BC018422.1 /DB_XREF=gi:17390996 /FEA=FLmRNA /CNT=176 /TID=Mm.5545.1 /TIER=FL+Stack /STK=141 /UG=Mm.5545 /LL=69702 /UG_GENE=2410001M24Rik /DEF=Mus musculus, RIKEN cDNA 2410001M24 gene, clone MGC:27963 IMAGE:3593650, mRNA, complete cds. /PROD=RIKEN cDNA 2410001M24 gene /FL=gb:BC018422.1
1423716_s_at	2966	P	0.01074	-1.3	-2.46	D	0.99995	5e-05	gb:BC008273.1 /DB_XREF=gi:14198433 /FEA=FLmRNA /CNT=243 /TID=Mm.22514.1 /TIER=FL+Stack /STK=139 /UG=Mm.22514 /LL=66043 /UG_GENE=0610008F14Rik /DEF=Mus musculus, RIKEN cDNA 0610008F14 gene, clone MGC:6312 IMAGE:2811419, mRNA, complete cds. /PROD=RIKEN cDNA 0610008F14 gene /FL=gb:BC008273.1
1423907_a_at	3202.3	P	0.00024	-1.3	-2.46	D	0.99998	2e-05	gb:BC021616.1 /DB_XREF=gi:18204464 /FEA=FLmRNA /CNT=122 /TID=Mm.44227.1 /TIER=FL+Stack /STK=81 /UG=Mm.44227 /DEF=Mus musculus, clone MGC:37950 IMAGE:5132866, mRNA, complete cds. /PROD=Unknown (protein for MGC:37950) /FL=gb:BC021616.1
1423908_at	1365.8	P	0.00024	-1.3	-2.46	D	0.99987	0.00013	gb:BC021616.1 /DB_XREF=gi:18204464 /FEA=FLmRNA /CNT=122 /TID=Mm.44227.1 /TIER=FL+Stack /STK=81 /UG=Mm.44227 /DEF=Mus musculus, clone MGC:37950 IMAGE:5132866, mRNA, complete cds. /PROD=Unknown (protein for MGC:37950) /FL=gb:BC021616.1
1424018_at	1205.9	P	0.00024	-1.3	-2.46	D	0.99998	2e-05	gb:U60001.1 /DB_XREF=gi:1519045 /GEN=mPKCI /FEA=FLmRNA /CNT=127 /TID=Mm.425.1 /TIER=FL+Stack /STK=62 /UG=Mm.425 /LL=15254 /DEF=Mus musculus protein kinase C inhibitor (mPKCI) mRNA, complete cds. /PROD=protein kinase C inhibitor /FL=gb:U60001.1
1424175_at	1024	P	0.02393	-1.3	-2.46	D	0.99951	0.00049	gb:BC017689.1 /DB_XREF=gi:17389268 /FEA=FLmRNA /CNT=148 /TID=Mm.19258.1 /TIER=FL+Stack /STK=47 /UG=Mm.19258 /LL=66951 /UG_GENE=2310028D20Rik /DEF=Mus musculus, Similar to thyrotroph embryonic factor, clone MGC:19233 IMAGE:4242534, mRNA, complete cds. /PROD=Similar to thyrotroph embryonic factor /FL=gb:BC017689.1
1424182_at	997.6	P	0.00024	-1.3	-2.46	D	0.99994	6e-05	gb:BC024763.1 /DB_XREF=gi:19354554 /FEA=FLmRNA /CNT=289 /TID=Mm.219649.1 /TIER=FL+Stack /STK=46 /UG=Mm.219649 /DEF=Mus musculus, Similar to Acetyl-Co A acetyltransferase 1, mitochondrial, clone MGC:39067 IMAGE:5365469, mRNA, complete cds. /PROD=Similar to Acetyl-Co A acetyltransferase 1,mitochondrial /FL=gb:BC024763.1
1424316_at	335.5	P	0.00195	-1.3	-2.46	D	0.99997	3e-05	gb:BC018167.1 /DB_XREF=gi:17390371 /FEA=FLmRNA /CNT=109 /TID=Mm.24594.1 /TIER=FL+Stack /STK=38 /UG=Mm.24594 /LL=67283 /UG_GENE=Slc25a19 /DEF=Mus musculus, RIKEN cDNA 2900089E13 gene, clone MGC:25742 IMAGE:3989263, mRNA, complete cds. /PROD=RIKEN cDNA 2900089E13 gene /FL=gb:BC018167.1
1424364_a_at	738.2	P	0.00195	-1.3	-2.46	D	0.99979	0.00021	gb:BC024518.1 /DB_XREF=gi:19354490 /FEA=FLmRNA /CNT=81 /TID=Mm.22138.1 /TIER=FL+Stack /STK=35 /UG=Mm.22138 /DEF=Mus musculus, Similar to ubiquinol-cytochrome c reductase complex (7.2 kD), clone MGC:37480 IMAGE:4984172, mRNA, complete cds. /PROD=Similar to ubiquinol-cytochrome c reductasecomplex (7.2 kD) /FL=gb:BC024518.1
1424434_at	1679.8	P	0.00073	-1.3	-2.46	D	0.99961	0.00039	gb:BC024814.1 /DB_XREF=gi:19353686 /FEA=FLmRNA /CNT=48 /TID=Mm.67527.1 /TIER=FL+Stack /STK=33 /UG=Mm.67527 /DEF=Mus musculus, clone MGC:38788 IMAGE:5359405, mRNA, complete cds. /PROD=Unknown (protein for MGC:38788) /FL=gb:BC024814.1
1424480_s_at	1027.2	P	0.00073	-1.3	-2.46	D	0.99995	5e-05	gb:BC026151.1 /DB_XREF=gi:20072783 /FEA=FLmRNA /CNT=78 /TID=Mm.177194.2 /TIER=FL+Stack /STK=30 /UG=Mm.177194 /LL=11652 /UG_GENE=Akt2 /DEF=Mus musculus, thymoma viral proto-oncogene 2, clone MGC:14031 IMAGE:4187425, mRNA, complete cds. /PROD=thymoma viral proto-oncogene 2 /FL=gb:BC026151.1
1424531_a_at	1448.1	P	0.00024	-1.3	-2.46	D	0.99994	6e-05	gb:BC010807.1 /DB_XREF=gi:14789852 /FEA=FLmRNA /CNT=42 /TID=Mm.112.1 /TIER=FL+Stack /STK=26 /UG=Mm.112 /LL=21401 /UG_GENE=Tcea3 /DEF=Mus musculus, clone MGC:18902 IMAGE:4240584, mRNA, complete cds. /PROD=Unknown (protein for MGC:18902) /FL=gb:BC010807.1
1424628_a_at	4261.9	P	0.00024	-1.3	-2.46	D	0.99998	2e-05	gb:BC013640.1 /DB_XREF=gi:15489047 /FEA=FLmRNA /CNT=61 /TID=Mm.28349.1 /TIER=FL+Stack /STK=22 /UG=Mm.28349 /DEF=Mus musculus, Similar to MIPP65 protein, clone MGC:18783 IMAGE:4188234, mRNA, complete cds. /PROD=Similar to MIPP65 protein /FL=gb:BC013640.1
1424735_at	298.7	A	0.09522	-1.3	-2.46	D	0.99956	0.00044	gb:BC019978.1 /DB_XREF=gi:18043564 /FEA=FLmRNA /CNT=220 /TID=Mm.37395.1 /TIER=FL+Stack /STK=17 /UG=Mm.37395 /DEF=Mus musculus, Similar to KIAA1896 protein, clone MGC:28954 IMAGE:4239441, mRNA, complete cds. /PROD=Similar to KIAA1896 protein /FL=gb:BC022114.1 gb:BC019978.1
1424760_a_at	1457	P	0.00024	-1.3	-2.46	D	0.99998	2e-05	gb:BC023119.1 /DB_XREF=gi:18606375 /FEA=FLmRNA /CNT=46 /TID=Mm.156895.1 /TIER=FL+Stack /STK=17 /UG=Mm.156895 /LL=68639 /UG_GENE=1110020E07Rik /DEF=Mus musculus, Similar to HSKM-B protein, clone MGC:28724 IMAGE:4458755, mRNA, complete cds. /PROD=Similar to HSKM-B protein /FL=gb:BC023119.1
1425148_a_at	175.5	P	0.0376	-1.3	-2.46	D	0.99903	0.00097	gb:BC025911.1 /DB_XREF=gi:19483993 /FEA=FLmRNA /CNT=27 /TID=Mm.28240.1 /TIER=FL /STK=5 /UG=Mm.28240 /LL=72183 /UG_GENE=2810425K19Rik /DEF=Mus musculus, Similar to sorting nexin 6, clone MGC:32316 IMAGE:5027318, mRNA, complete cds. /PROD=Similar to sorting nexin 6 /FL=gb:BC025911.1
1425531_at	109.3	P	0.00293	-1.3	-2.46	D	0.99969	0.00031	gb:BC026751.1 /DB_XREF=gi:20071192 /FEA=FLmRNA /CNT=36 /TID=Mm.41486.1 /TIER=FL /STK=1 /UG=Mm.41486 /LL=70103 /UG_GENE=2700001K05Rik /DEF=Mus musculus, Similar to putative cyclin G1 interacting protein, clone MGC:25516 IMAGE:3153902, mRNA, complete cds. /PROD=Similar to putative cyclin G1 interactingprotein /FL=gb:BC026751.1
1426210_x_at	1207.4	P	0.00073	-1.3	-2.46	D	0.99923	0.00077	gb:BC014870.1 /DB_XREF=gi:15928822 /FEA=FLmRNA /CNT=103 /TID=Mm.23981.1 /TIER=FL+Stack /STK=64 /UG=Mm.23981 /DEF=Mus musculus, clone MGC:11997 IMAGE:3602116, mRNA, complete cds. /PROD=Unknown (protein for MGC:11997) /FL=gb:BC014870.1
1426584_a_at	947.4	P	0.00024	-1.3	-2.46	D	0.99987	0.00013	gb:BI143942 /DB_XREF=gi:14603943 /DB_XREF=602908034F1 /CLONE=IMAGE:5064897 /FEA=FLmRNA /CNT=571 /TID=Mm.104920.1 /TIER=Stack /STK=12 /UG=Mm.104920 /LL=20322 /UG_GENE=Sdh1 /UG_TITLE=sorbitol dehydrogenase 1 /FL=gb:BC024124.1
1427021_s_at	3853.7	P	0.00024	-1.3	-2.46	D	0.99997	4e-05	gb:BE457668 /DB_XREF=gi:9480038 /DB_XREF=us95a09.x1 /CLONE=IMAGE:3326104 /FEA=mRNA /CNT=202 /TID=Mm.182962.1 /TIER=Stack /STK=12 /UG=Mm.182962 /LL=66085 /UG_GENE=Eif3s5 /UG_TITLE=eukaryotic translation initiation factor 3, subunit 5 (epsilon)
1427735_a_at	9740.9	P	0.00024	-1.3	-2.46	D	0.99995	5e-05	gb:M12233.1 /DB_XREF=gi:191576 /FEA=mRNA /CNT=1 /TID=Mm.214950.2 /TIER=ConsEnd /STK=0 /UG=Mm.214950 /LL=11459 /UG_GENE=Acta1 /UG_TITLE=actin, alpha 1, skeletal muscle /DEF=Mouse skeletal muscle alpha-actin mRNA.
1427903_at	522.7	P	0.00073	-1.3	-2.46	D	0.99998	2e-05	gb:BB650419 /DB_XREF=gi:16484674 /DB_XREF=BB650419 /CLONE=C230098K17 /FEA=mRNA /CNT=77 /TID=Mm.177990.1 /TIER=Stack /STK=37 /UG=Mm.177990 /LL=75454 /UG_GENE=1700008C22Rik /UG_TITLE=RIKEN cDNA 1700008C22 gene
1427916_at	260.5	P	0.00024	-1.3	-2.46	D	0.99998	2e-05	gb:BB122084 /DB_XREF=gi:8774652 /DB_XREF=BB122084 /CLONE=9530084J01 /FEA=mRNA /CNT=62 /TID=Mm.46739.1 /TIER=Stack /STK=24 /UG=Mm.46739 /UG_TITLE=Mus musculus St7l mRNA for Tumorsuppressor St7-like product, complete cds
1427992_a_at	941.9	P	0.00024	-1.3	-2.46	D	0.99989	0.00011	gb:BF729629 /DB_XREF=gi:12047493 /DB_XREF=mab66a08.x1 /CLONE=IMAGE:3975086 /FEA=mRNA /CNT=28 /TID=Mm.21759.1 /TIER=Stack /STK=8 /UG=Mm.21759 /LL=19328 /UG_GENE=Rab12 /UG_TITLE=RAB12, member RAS oncogene family
1428075_at	5297.3	P	0.00024	-1.3	-2.46	D	0.99995	5e-05	gb:BG968046 /DB_XREF=gi:14355683 /DB_XREF=602832427F1 /CLONE=IMAGE:4986991 /FEA=mRNA /CNT=246 /TID=Mm.29065.1 /TIER=Stack /STK=150 /UG=Mm.29065 /LL=68194 /UG_GENE=0610006N12Rik /UG_TITLE=RIKEN cDNA 0610006N12 gene
1428140_at	2565.4	P	0.03027	-1.3	-2.46	D	0.99996	4e-05	gb:AK010029.1 /DB_XREF=gi:12845190 /FEA=mRNA /CNT=185 /TID=Mm.13445.2 /TIER=Stack /STK=97 /UG=Mm.13445 /LL=67041 /UG_GENE=Oxct /UG_TITLE=3-oxoacid CoA transferase /DEF=Mus musculus adult male tongue cDNA, RIKEN full-length enriched library, clone:2310063M03:homolog to SUCCINYL-COA:3-KETOACID-COENZYME A TRANSFERASE, MITOCHONDRIAL PRECURSOR (EC 2.8.3.5) (SUCCINYL COA:3-OXOACID COA-TRANSFERASE), ful…
1428235_at	2327.9	P	0.00073	-1.3	-2.46	D	0.99992	8e-05	gb:AK013962.1 /DB_XREF=gi:12851550 /FEA=mRNA /CNT=234 /TID=Mm.10406.1 /TIER=Stack /STK=68 /UG=Mm.10406 /LL=66925 /UG_GENE=3110001M13Rik /UG_TITLE=RIKEN cDNA 3110001M13 gene /DEF=Mus musculus 13 days embryo head cDNA, RIKEN full-length enriched library, clone:3110001M13:homolog to SUCCINATE DEHYDROGENASE (UBIQUINONE) CYTOCHROME B SMALL SUBUNIT, MITOCHONDRIAL PRECURSOR (CYBS), full insert sequence.
1428360_x_at	888.1	P	0.00293	-1.3	-2.46	D	0.99993	7e-05	gb:BI558499 /DB_XREF=gi:15445813 /DB_XREF=603240383F1 /CLONE=IMAGE:5293076 /FEA=mRNA /CNT=123 /TID=Mm.29513.2 /TIER=Stack /STK=48 /UG=Mm.29513 /LL=66416 /UG_GENE=Ndufa7 /UG_TITLE=NADH dehydrogenase (ubiquinone) 1 alpha subcomplex, 7 (14.5kD, B14.5a)
1428745_a_at	602.4	P	0.00073	-1.3	-2.46	D	0.99951	0.00049	gb:AK009123.1 /DB_XREF=gi:12843721 /FEA=mRNA /CNT=32 /TID=Mm.32961.2 /TIER=Stack /STK=23 /UG=Mm.32961 /LL=69487 /UG_GENE=2310003L22Rik /UG_TITLE=RIKEN cDNA 2310003L22 gene /DEF=Mus musculus adult male tongue cDNA, RIKEN full-length enriched library, clone:2310003L22:homolog to CDNA: FLJ22324 FIS, CLONE HRC05551 (HYPOTHETICAL 17.7 KDA PROTEIN), full insert sequence.
1429122_a_at	242.5	P	0.00073	-1.3	-2.46	D	0.99951	0.00049	gb:AK006658.1 /DB_XREF=gi:12839864 /FEA=mRNA /CNT=26 /TID=Mm.28037.1 /TIER=Stack /STK=11 /UG=Mm.28037 /LL=73327 /UG_GENE=1700040I03Rik /UG_TITLE=RIKEN cDNA 1700040I03 gene /DEF=Mus musculus adult male testis cDNA, RIKEN full-length enriched library, clone:1700040I03:PA domain containing protein, full insert sequence.
1429453_a_at	375.8	M	0.05615	-1.3	-2.46	D	0.99965	0.00035	gb:BM209870 /DB_XREF=gi:17766486 /DB_XREF=C0655A02-3 /CLONE=C0655A02 /FEA=mRNA /CNT=71 /TID=Mm.34801.2 /TIER=Stack /STK=20 /UG=Mm.34801 /LL=67212 /UG_GENE=Mrpl55 /UG_TITLE=mitochondrial ribosomal protein L55
1429708_at	1376.4	P	0.00073	-1.3	-2.46	D	0.99985	0.00015	gb:AA596846 /DB_XREF=gi:2412281 /DB_XREF=vo16f01.r1 /CLONE=IMAGE:1050073 /FEA=mRNA /CNT=124 /TID=Mm.27087.1 /TIER=Stack /STK=9 /UG=Mm.27087 /LL=69875 /UG_GENE=2010012C24Rik /UG_TITLE=RIKEN cDNA 2010012C24 gene
1430326_s_at	3316.5	P	0.00073	-1.3	-2.46	D	0.99998	2e-05	gb:AK003160.1 /DB_XREF=gi:12833654 /FEA=mRNA /CNT=8 /TID=Mm.196343.1 /TIER=ConsEnd /STK=2 /UG=Mm.196343 /LL=66099 /UG_GENE=1100001F06Rik /UG_TITLE=RIKEN cDNA 1100001F06 gene /DEF=Mus musculus 18 days embryo whole body cDNA, RIKEN full-length enriched library, clone:1100001F06:homolog to UBIQUINOL-CYTOCHROME C REDUCTASE COMPLEX UBIQUINONE-BINDING PROTEIN QP-C (EC 1.10.2.2) (UBIQUINOL-CYTOCHROME C …
1430979_a_at	353.1	P	0.00073	-1.3	-2.46	D	0.99961	0.00039	gb:AK011963.1 /DB_XREF=gi:12848409 /FEA=mRNA /CNT=82 /TID=Mm.42948.2 /TIER=ConsEnd /STK=0 /UG=Mm.42948 /LL=21672 /UG_GENE=Prdx2 /UG_TITLE=peroxiredoxin 2 /DEF=Mus musculus 10 days embryo whole body cDNA, RIKEN full-length enriched library, clone:2610302E15:peroxiredoxin 2, full insert sequence.
1431293_a_at	468.8	P	0.02393	-1.3	-2.46	D	0.99965	0.00035	gb:AK012260.1 /DB_XREF=gi:12848888 /FEA=mRNA /CNT=5 /TID=Mm.29482.3 /TIER=ConsEnd /STK=0 /UG=Mm.29482 /LL=27681 /UG_GENE=D11Moh34 /UG_TITLE=DNA segment, Chr 11, KL Mohlke 34 /DEF=Mus musculus 11 days embryo whole body cDNA, RIKEN full-length enriched library, clone:2700018K11:DNA segment, Chr 11, KL Mohlke 34, full insert sequence.
1433510_x_at	1291.5	P	0.00024	-1.3	-2.46	D	0.99997	3e-05	gb:AV216370 /DB_XREF=gi:6157215 /DB_XREF=AV216370 /CLONE=2410160E13 /FEA=EST /CNT=117 /TID=Mm.11376.2 /TIER=Stack /STK=113 /UG=Mm.11376 /LL=54217 /UG_GENE=Rpl36 /UG_TITLE=ribosomal protein L36
1433558_at	578.3	P	0.00073	-1.3	-2.46	D	0.99995	5e-05	gb:BM231046 /DB_XREF=gi:17866316 /DB_XREF=K0304D12-3 /CLONE=K0304D12 /FEA=EST /CNT=117 /TID=Mm.29629.1 /TIER=Stack /STK=92 /UG=Mm.29629 /LL=98996 /UG_GENE=AI480459 /UG_TITLE=expressed sequence AI480459
1433616_a_at	2576.6	P	0.00293	-1.3	-2.46	D	0.99979	0.00021	gb:BG793007 /DB_XREF=gi:14128577 /DB_XREF=UTSW_H7D3 /CLONE=UTSW_H7D3 /FEA=EST /CNT=123 /TID=Mm.29828.2 /TIER=Stack /STK=81 /UG=Mm.29828 /LL=69159 /UG_GENE=1810036J22Rik /UG_TITLE=RIKEN cDNA 1810036J22 gene
1433786_x_at	3178.7	P	0.00024	-1.3	-2.46	D	0.99991	9e-05	gb:AI596986 /DB_XREF=gi:4606034 /DB_XREF=vj64h09.x1 /CLONE=IMAGE:933857 /FEA=EST /CNT=65 /TID=Mm.200975.5 /TIER=Stack /STK=61 /UG=Mm.200975 /LL=20366 /UG_GENE=Serf2 /UG_TITLE=small EDRK-rich factor 2
1434053_x_at	4309.6	P	0.00024	-1.3	-2.46	D	0.99903	0.00097	gb:AV216686 /DB_XREF=gi:6157531 /DB_XREF=AV216686 /CLONE=2410165P03 /FEA=EST /CNT=48 /TID=Mm.19370.2 /TIER=Stack /STK=45 /UG=Mm.19370 /LL=11958 /UG_GENE=Atp5k /UG_TITLE=ATP synthase, H+ transporting, mitochondrial F1F0 complex, subunit e
1434213_x_at	1235.3	P	0.01856	-1.3	-2.46	D	0.99985	0.00015	gb:BG244243 /DB_XREF=gi:12754058 /DB_XREF=602356434F1 /CLONE=IMAGE:4485056 /FEA=EST /CNT=39 /TID=Mm.44227.2 /TIER=Stack /STK=39 /UG=Mm.44227 /UG_TITLE=Mus musculus, clone MGC:37950 IMAGE:5132866, mRNA, complete cds
1434579_x_at	4032.1	P	0.00024	-1.3	-2.46	D	0.99996	4e-05	gb:BB272517 /DB_XREF=gi:8969536 /DB_XREF=BB272517 /CLONE=A830076K05 /FEA=EST /CNT=31 /TID=Mm.44227.3 /TIER=Stack /STK=29 /UG=Mm.44227 /UG_TITLE=Mus musculus, clone MGC:37950 IMAGE:5132866, mRNA, complete cds
1434624_x_at	4101.6	P	0.00024	-1.3	-2.46	D	0.99997	3e-05	gb:AA762498 /DB_XREF=gi:2812245 /DB_XREF=vv84a10.r1 /CLONE=IMAGE:1229082 /FEA=EST /CNT=33 /TID=Mm.13944.4 /TIER=Stack /STK=28 /UG=Mm.13944 /LL=76846 /UG_GENE=3010033P07Rik /UG_TITLE=RIKEN cDNA 3010033P07 gene
1435151_a_at	4773	P	0.00024	-1.3	-2.46	D	0.99998	2e-05	gb:AW108231 /DB_XREF=gi:6079031 /DB_XREF=um27f10.x1 /CLONE=IMAGE:2225803 /FEA=EST /CNT=28 /TID=Mm.147693.2 /TIER=Stack /STK=19 /UG=Mm.147693 /LL=27050 /UG_GENE=Rps3 /UG_TITLE=ribosomal protein S3
1435178_x_at	6551.7	P	0.00024	-1.3	-2.46	D	0.99993	7e-05	gb:BF019960 /DB_XREF=gi:10751292 /DB_XREF=ux05e02.x1 /CLONE=IMAGE:3470618 /FEA=EST /CNT=25 /TID=Mm.45312.4 /TIER=Stack /STK=19 /UG=Mm.45312 /LL=59008 /UG_GENE=Anapc5 /UG_TITLE=anaphase-promoting complex subunit 5
1435631_x_at	1013	P	0.00024	-1.3	-2.46	D	0.99997	3e-05	gb:AV005520 /DB_XREF=gi:4782370 /DB_XREF=AV005520 /CLONE=1010001B07 /FEA=EST /CNT=15 /TID=Mm.182692.3 /TIER=Stack /STK=15 /UG=Mm.182692 /LL=54673 /UG_GENE=Sh3glb1 /UG_TITLE=SH3-domain GRB2-like B1 (endophilin)
1435695_a_at	172.1	P	0.03027	-1.3	-2.46	D	0.99987	0.00013	gb:AA673177 /DB_XREF=gi:2646459 /DB_XREF=vp46b07.r1 /CLONE=IMAGE:1079701 /FEA=EST /CNT=16 /TID=Mm.27337.2 /TIER=Stack /STK=14 /UG=Mm.27337 /LL=68252 /UG_GENE=A030007L17Rik /UG_TITLE=RIKEN cDNA A030007L17 gene
1436038_a_at	1535	P	0.00024	-1.3	-2.46	D	0.99998	2e-05	gb:BF318238 /DB_XREF=gi:11266816 /DB_XREF=ux08c09.x1 /CLONE=IMAGE:3470896 /FEA=EST /CNT=22 /TID=Mm.39490.4 /TIER=Stack /STK=11 /UG=Mm.39490 /LL=56176 /UG_GENE=Dcrc /UG_TITLE=Down syndrome critical region gene c
1436949_a_at	1131.6	P	0.00024	-1.3	-2.46	D	0.99998	2e-05	gb:AV068352 /DB_XREF=gi:5188180 /DB_XREF=AV068352 /CLONE=2010303D07 /FEA=EST /CNT=102 /TID=Mm.153758.3 /TIER=Stack /STK=33 /UG=Mm.153758 /LL=67673 /UG_GENE=0610040H15Rik /UG_TITLE=RIKEN cDNA 0610040H15 gene
1438091_a_at	1433.5	P	0.00024	-1.3	-2.46	D	0.99997	4e-05	gb:AV003424 /DB_XREF=gi:4780274 /DB_XREF=AV003424 /CLONE=0610027M19 /FEA=EST /CNT=14 /TID=Mm.916.5 /TIER=Stack /STK=12 /UG=Mm.916 /LL=51788 /UG_GENE=H2afz /UG_TITLE=H2A histone family, member Z
1438385_s_at	1849.9	P	0.00024	-1.3	-2.46	D	0.99998	2e-05	gb:BB068040 /DB_XREF=gi:8525454 /DB_XREF=BB068040 /CLONE=8030469I16 /FEA=EST /CNT=11 /TID=Mm.29122.5 /TIER=Stack /STK=11 /UG=Mm.29122 /LL=59052 /UG_GENE=0610012D09Rik /UG_TITLE=RIKEN cDNA 0610012D09 gene
1438477_a_at	402.7	P	0.00024	-1.3	-2.46	D	0.99981	0.00019	gb:AA960125 /DB_XREF=gi:3126025 /DB_XREF=ub54f09.s1 /CLONE=IMAGE:1381577 /FEA=EST /CNT=13 /TID=Mm.10093.2 /TIER=Stack /STK=10 /UG=Mm.10093 /LL=73724 /UG_GENE=1110007A04Rik /UG_TITLE=RIKEN cDNA 1110007A04 gene
1438626_x_at	3614.1	P	0.00073	-1.3	-2.46	D	0.99998	2e-05	gb:AV148464 /DB_XREF=gi:5352597 /DB_XREF=AV148464 /CLONE=2810478I15 /FEA=EST /CNT=10 /TID=Mm.43749.7 /TIER=Stack /STK=10 /UG=Mm.43749 /LL=67115 /UG_GENE=3100001N19Rik /UG_TITLE=RIKEN cDNA 3100001N19 gene
1439466_s_at	373.1	P	0.00024	-1.3	-2.46	D	0.99995	5e-05	gb:BB001490 /DB_XREF=gi:7841418 /DB_XREF=BB001490 /CLONE=3110026K15 /FEA=EST /CNT=8 /TID=Mm.176845.5 /TIER=Stack /STK=8 /UG=Mm.176845 /LL=71799 /UG_GENE=1110069M14Rik /UG_TITLE=RIKEN cDNA 1110069M14 gene
1448100_at	4040.4	P	0.00024	-1.3	-2.46	D	0.99997	4e-05	gb:NM_133797.1 /DB_XREF=gi:19527011 /GEN=C81457 /FEA=FLmRNA /CNT=376 /TID=Mm.24593.1 /TIER=FL+Stack /STK=239 /UG=Mm.24593 /LL=97820 /DEF=Mus musculus expressed sequence C81457 (C81457), mRNA. /PROD=RIKEN cDNA 4833439L19 /FL=gb:NM_133797.1
1448109_a_at	2063.9	P	0.00024	-1.3	-2.46	D	0.99903	0.00097	gb:NM_009080.1 /DB_XREF=gi:6677776 /GEN=Rpl26 /FEA=FLmRNA /CNT=313 /TID=Mm.3229.1 /TIER=FL+Stack /STK=215 /UG=Mm.3229 /LL=19941 /DEF=Mus musculus ribosomal protein L26 (Rpl26), mRNA. /PROD=ribosomal protein L26 /FL=gb:NM_009080.1
1448112_at	4045.5	P	0.0376	-1.3	-2.46	D	0.99993	7e-05	gb:NM_007749.1 /DB_XREF=gi:6680990 /GEN=Cox7c /FEA=FLmRNA /CNT=357 /TID=Mm.43786.1 /TIER=FL+Stack /STK=207 /UG=Mm.43786 /LL=12867 /DEF=Mus musculus cytochrome c oxidase, subunit VIIc (Cox7c), mRNA. /PROD=cytochrome c oxidase subunit VIIc /FL=gb:BC010772.1 gb:NM_007749.1
1448249_at	2387.2	P	0.00195	-1.3	-2.46	D	0.99998	2e-05	gb:BC019391.1 /DB_XREF=gi:18043605 /FEA=FLmRNA /CNT=232 /TID=Mm.10669.1 /TIER=FL+Stack /STK=113 /UG=Mm.10669 /LL=14555 /UG_GENE=Gdc1 /DEF=Mus musculus, glycerol phosphate dehydrogenase 1, cytoplasmic adult, clone MGC:25620 IMAGE:4194849, mRNA, complete cds. /PROD=glycerol phosphate dehydrogenase 1, cytoplasmicadult /FL=gb:BC019391.1 gb:NM_010271.1 gb:J02655.1
1448277_at	301.2	P	0.02393	-1.3	-2.46	D	0.99914	0.00087	gb:NM_008894.1 /DB_XREF=gi:6679412 /GEN=Pold2 /FEA=FLmRNA /CNT=166 /TID=Mm.35788.1 /TIER=FL+Stack /STK=105 /UG=Mm.35788 /LL=18972 /DEF=Mus musculus polymerase (DNA directed), delta 2, regulatory subunit (50 kDa) (Pold2), mRNA. /PROD=polymerase (DNA directed), delta 2, regulatorysubunit (50 kDa) /FL=gb:NM_008894.1 gb:BC003342.1
1448350_at	92.8	A	0.14966	-1.3	-2.46	D	0.99961	0.00039	gb:NM_133768.1 /DB_XREF=gi:19526985 /GEN=2510006M18Rik /FEA=FLmRNA /CNT=175 /TID=Mm.23869.1 /TIER=FL+Stack /STK=87 /UG=Mm.23869 /LL=76802 /DEF=Mus musculus RIKEN cDNA 2510006M18 gene (2510006M18Rik), mRNA. /PROD=RIKEN cDNA 2510006M18 /FL=gb:BC016670.1 gb:NM_133768.1
1448700_at	399.6	P	0.00073	-1.3	-2.46	D	0.99965	0.00035	gb:NM_008059.1 /DB_XREF=gi:6679888 /GEN=G0s2 /FEA=FLmRNA /CNT=99 /TID=Mm.3283.1 /TIER=FL+Stack /STK=45 /UG=Mm.3283 /LL=14373 /DEF=Mus musculus G0G1 switch gene 2 (G0s2), mRNA. /PROD=G0G1 switch gene 2 /FL=gb:NM_008059.1
1448853_at	555.8	P	0.0376	-1.3	-2.46	D	0.99914	0.00087	gb:NM_025292.1 /DB_XREF=gi:13384641 /GEN=Synj2bp /FEA=FLmRNA /CNT=159 /TID=Mm.141066.1 /TIER=FL+Stack /STK=35 /UG=Mm.141066 /LL=24071 /DEF=Mus musculus synaptojanin 2 binding protein (Synj2bp), mRNA. /PROD=synaptojanin 2 binding protein /FL=gb:NM_025292.1 gb:BC027433.1
1448999_at	300.4	P	0.00024	-1.3	-2.46	D	0.99989	0.00011	gb:AV226526 /DB_XREF=gi:16385341 /DB_XREF=AV226526 /CLONE=4021401A16 /FEA=FLmRNA /CNT=120 /TID=Mm.29090.1 /TIER=Stack /STK=48 /UG=Mm.29090 /LL=66682 /UG_GENE=4021401A16Rik /UG_TITLE=RIKEN cDNA 4021401A16 gene /FL=gb:NM_025701.1
1449003_a_at	1616.8	P	0.00024	-1.3	-2.46	D	0.99938	0.00062	gb:NM_016800.1 /DB_XREF=gi:7949164 /GEN=Vti1b-pending /FEA=FLmRNA /CNT=62 /TID=Mm.6577.1 /TIER=FL+Stack /STK=27 /UG=Mm.6577 /LL=53612 /DEF=Mus musculus vesicle transport through interaction with t-SNAREs 1b homolog (Vti1b-pending), mRNA. /PROD=vesicle transport through interaction witht-SNAREs 1b homolog /FL=gb:AF035821.1 gb:AF035208.1 gb:BC009810.1 gb:NM_016800.1
1449818_at	2540.1	P	0.00073	-1.3	-2.46	D	0.99945	0.00055	gb:NM_008830.1 /DB_XREF=gi:6679296 /GEN=Abcb4 /FEA=FLmRNA /CNT=14 /TID=Mm.14172.1 /TIER=FL /STK=6 /UG=Mm.14172 /LL=18670 /DEF=Mus musculus ATP-binding cassette, sub-family B (MDRTAP), member 4 (Abcb4), mRNA. /PROD=ATP-binding cassette, sub-family B (MDRTAP),member 4 /FL=gb:NM_008830.1 gb:J03398.1
1450017_at	2456	P	0.00073	-1.3	-2.46	D	0.99995	5e-05	gb:BG065754 /DB_XREF=gi:12548317 /DB_XREF=H3034H06-3 /CLONE=H3034H06 /FEA=FLmRNA /CNT=268 /TID=Mm.2103.1 /TIER=Stack /STK=9 /UG=Mm.2103 /LL=12450 /UG_GENE=Ccng /UG_TITLE=cyclin G /FL=gb:BC005534.1 gb:L49507.1 gb:NM_009831.1
1450149_a_at	4858.8	P	0.00024	-1.3	-2.46	D	0.99996	4e-05	gb:NM_013636.1 /DB_XREF=gi:7305404 /GEN=Ppp1cc /FEA=FLmRNA /CNT=12 /TID=Mm.7793.1 /TIER=FL /STK=2 /UG=Mm.7793 /LL=19047 /DEF=Mus musculus protein phosphatase 1, catalytic subunit, gamma isoform (Ppp1cc), mRNA. /PROD=protein phosphatase 1, catalytic subunit, gammaisoform /FL=gb:NM_013636.1 gb:U53456.1
1450721_at	1180.4	P	0.00073	-1.3	-2.46	D	0.99951	0.00049	gb:AW554436 /DB_XREF=gi:7199859 /DB_XREF=L0240G08-3 /CLONE=L0240G08 /FEA=FLmRNA /CNT=167 /TID=Mm.26166.1 /TIER=Stack /STK=53 /UG=Mm.26166 /LL=11431 /UG_GENE=Acp1 /UG_TITLE=acid phosphatase 1, soluble /FL=gb:NM_021330.1
1450865_s_at	549.6	P	0.00293	-1.3	-2.46	D	0.99938	0.00062	gb:BF167852 /DB_XREF=gi:11048204 /DB_XREF=601774677F1 /CLONE=IMAGE:3995251 /FEA=FLmRNA /CNT=79 /TID=Mm.7328.1 /TIER=Stack /STK=44 /UG=Mm.7328 /LL=67297 /UG_GENE=3110030K20Rik /UG_TITLE=RIKEN cDNA 3110030K20 gene /FL=gb:NM_026080.1
1451000_at	2650.9	P	0.00024	-1.3	-2.46	D	0.99998	2e-05	gb:BB667677 /DB_XREF=gi:16399126 /DB_XREF=BB667677 /CLONE=C730031K14 /FEA=FLmRNA /CNT=164 /TID=Mm.28963.1 /TIER=Stack /STK=19 /UG=Mm.28963 /LL=66271 /UG_GENE=1810020E01Rik /UG_TITLE=RIKEN cDNA 1810020E01 gene /FL=gb:NM_025460.1 gb:BC023171.1
1451077_at	301.7	P	0.00024	-1.3	-2.46	D	0.99973	0.00027	gb:BM114165 /DB_XREF=gi:17077183 /DB_XREF=L0800E02-3 /CLONE=L0800E02 /FEA=FLmRNA /CNT=412 /TID=Mm.4419.1 /TIER=Stack /STK=10 /UG=Mm.4419 /LL=19983 /UG_GENE=Rpl5 /UG_TITLE=ribosomal protein L5 /FL=gb:BC026934.1
1451090_a_at	713.7	P	0.00073	-1.3	-2.46	D	0.99997	3e-05	gb:BC006682.1 /DB_XREF=gi:13879401 /FEA=FLmRNA /CNT=210 /TID=Mm.22387.1 /TIER=FL+Stack /STK=129 /UG=Mm.22387 /LL=102885 /UG_GENE=AI314668 /DEF=Mus musculus, clone MGC:7893 IMAGE:3582458, mRNA, complete cds. /PROD=Unknown (protein for MGC:7893) /FL=gb:BC006682.1
1451125_at	1230	P	0.00024	-1.3	-2.46	D	0.99965	0.00035	gb:BC017133.1 /DB_XREF=gi:16877794 /FEA=FLmRNA /CNT=197 /TID=Mm.28332.1 /TIER=FL+Stack /STK=104 /UG=Mm.28332 /DEF=Mus musculus, clone MGC:27648 IMAGE:4511542, mRNA, complete cds. /PROD=Unknown (protein for MGC:27648) /FL=gb:BC017133.1
1451178_at	1012.8	P	0.02393	-1.3	-2.46	D	0.99998	2e-05	gb:BC022162.1 /DB_XREF=gi:18381092 /FEA=FLmRNA /CNT=122 /TID=Mm.41574.1 /TIER=FL+Stack /STK=76 /UG=Mm.41574 /LL=68499 /UG_GENE=Mrpl53 /DEF=Mus musculus, mitochondrial ribosomal protein L53, clone MGC:37995 IMAGE:5148541, mRNA, complete cds. /PROD=mitochondrial ribosomal protein L53 /FL=gb:BC022162.1
1451290_at	925.8	P	0.00024	-1.3	-2.46	D	0.99998	2e-05	gb:BC010596.1 /DB_XREF=gi:14714881 /FEA=FLmRNA /CNT=95 /TID=Mm.196239.1 /TIER=FL+Stack /STK=41 /UG=Mm.196239 /LL=66734 /UG_GENE=4922501H04Rik /DEF=Mus musculus, MAP1 light chain 3-like protein 1, clone MGC:6325 IMAGE:3256801, mRNA, complete cds. /PROD=MAP1 light chain 3-like protein 1 /FL=gb:BC010596.1
1451504_at	2219.3	P	0.00024	-1.3	-2.46	D	0.99987	0.00013	gb:BC021941.1 /DB_XREF=gi:18314670 /FEA=FLmRNA /CNT=191 /TID=Mm.21501.1 /TIER=FL+Stack /STK=13 /UG=Mm.21501 /LL=66075 /UG_GENE=0610041L09Rik /DEF=Mus musculus, RIKEN cDNA 0610041L09 gene, clone MGC:36194 IMAGE:5124504, mRNA, complete cds. /PROD=RIKEN cDNA 0610041L09 gene /FL=gb:BC021941.1
1451541_at	480.9	P	0.04614	-1.3	-2.46	D	0.99956	0.00044	gb:BC019781.1 /DB_XREF=gi:18043155 /FEA=FLmRNA /CNT=41 /TID=Mm.98228.1 /TIER=FL+Stack /STK=10 /UG=Mm.98228 /LL=66821 /UG_GENE=Bcs1l /DEF=Mus musculus, BCS1-like (yeast), clone MGC:25440 IMAGE:4036047, mRNA, complete cds. /PROD=BCS1-like (yeast) /FL=gb:BC019781.1
1451676_at	1707.6	P	0.00024	-1.3	-2.46	D	0.99991	9e-05	gb:BC002090.1 /DB_XREF=gi:12805254 /FEA=FLmRNA /CNT=31 /TID=Mm.27128.1 /TIER=FL /STK=2 /UG=Mm.27128 /LL=66556 /UG_GENE=2310074H19Rik /DEF=Mus musculus, Similar to DR1-associated protein 1 (negative cofactor 2 alpha), clone MGC:6341 IMAGE:3488139, mRNA, complete cds. /PROD=Similar to DR1-associated protein 1 (negativecofactor 2 alpha) /FL=gb:BC002090.1
1451803_a_at	617.5	P	0.04614	-1.3	-2.46	D	0.99997	3e-05	gb:U48800.1 /DB_XREF=gi:1234824 /GEN=VEGF-B /FEA=FLmRNA /CNT=7 /TID=Mm.15607.2 /TIER=FL /STK=1 /UG=Mm.15607 /LL=22340 /DEF=Mus musculus vascular endothelial growth factor B precursor (VEGF-B) mRNA, complete cds. /PROD=vascular endothelial growth factor B precursor /FL=gb:U43837.1 gb:U48800.1
1452005_at	1228.7	P	0.00073	-1.3	-2.46	D	0.99903	0.00097	gb:AV336908 /DB_XREF=gi:16396419 /DB_XREF=AV336908 /CLONE=6332404G05 /FEA=FLmRNA /CNT=158 /TID=Mm.38786.1 /TIER=Stack /STK=19 /UG=Mm.38786 /UG_TITLE=Mus musculus, clone IMAGE:3586777, mRNA, partial cds /FL=gb:BC026680.1
1452085_at	599.6	P	0.00293	-1.3	-2.46	D	0.99998	2e-05	gb:BE134386 /DB_XREF=gi:8596886 /DB_XREF=ug10b04.x1 /CLONE=IMAGE:1531183 /FEA=FLmRNA /CNT=77 /TID=Mm.178424.2 /TIER=Stack /STK=14 /UG=Mm.178424 /LL=67210 /UG_GENE=2810047M21Rik /UG_TITLE=RIKEN cDNA 2810047M21 gene /FL=gb:AB047921.1
1452579_at	2395.4	P	0.00415	-1.3	-2.46	D	0.99998	2e-05	gb:AK009021.1 /DB_XREF=gi:12843562 /FEA=mRNA /CNT=116 /TID=Mm.29497.1 /TIER=Stack /STK=70 /UG=Mm.29497 /LL=66383 /UG_GENE=2310020H20Rik /UG_TITLE=RIKEN cDNA 2310020H20 gene /DEF=Mus musculus adult male tongue cDNA, RIKEN full-length enriched library, clone:2300003J05:homolog to NIFU-LIKE PROTEIN (FRAGMENT), full insert sequence.
1452621_at	438.3	P	0.00073	-1.3	-2.46	D	0.99989	0.00011	gb:AI324894 /DB_XREF=gi:4059323 /DB_XREF=mj64g07.x1 /CLONE=IMAGE:480924 /FEA=mRNA /CNT=25 /TID=Mm.28145.1 /TIER=Stack /STK=8 /UG=Mm.28145 /LL=72562 /UG_GENE=2700061N24Rik /UG_TITLE=RIKEN cDNA 2700061N24 gene
1452734_at	2014.5	P	0.00024	-1.3	-2.46	D	0.99979	0.00021	gb:BI410170 /DB_XREF=gi:15171093 /DB_XREF=602963853F1 /CLONE=IMAGE:5119212 /FEA=mRNA /CNT=182 /TID=Mm.181237.1 /TIER=Stack /STK=55 /UG=Mm.181237 /LL=68195 /UG_GENE=0610007O07Rik /UG_TITLE=RIKEN cDNA 0610007O07 gene
1452735_at	489.6	P	0.00415	-1.3	-2.46	D	0.99973	0.00027	gb:BG067396 /DB_XREF=gi:12549965 /DB_XREF=H3054A02-3 /CLONE=H3054A02 /FEA=mRNA /CNT=166 /TID=Mm.41939.1 /TIER=Stack /STK=29 /UG=Mm.41939 /LL=76302 /UG_GENE=1110018D06Rik /UG_TITLE=RIKEN cDNA 1110018D06 gene
1455126_x_at	4066.1	P	0.00024	-1.3	-2.46	D	0.99995	5e-05	gb:AV209841 /DB_XREF=gi:6150513 /DB_XREF=AV209841 /CLONE=1700121K23 /FEA=EST /CNT=25 /TID=Mm.29828.3 /TIER=Stack /STK=24 /UG=Mm.29828 /LL=69159 /UG_GENE=1810036J22Rik /UG_TITLE=RIKEN cDNA 1810036J22 gene
1455283_x_at	4066.7	P	0.00024	-1.3	-2.46	D	0.99997	3e-05	gb:BB453395 /DB_XREF=gi:9348834 /DB_XREF=BB453395 /CLONE=D130023B13 /FEA=EST /CNT=18 /TID=Mm.44227.4 /TIER=Stack /STK=18 /UG=Mm.44227 /UG_TITLE=Mus musculus, clone MGC:37950 IMAGE:5132866, mRNA, complete cds
1455385_at	1007.9	P	0.00024	-1.3	-2.46	D	0.99998	2e-05	gb:AV005520 /DB_XREF=gi:4782370 /DB_XREF=AV005520 /CLONE=1010001B07 /FEA=EST /CNT=15 /TID=Mm.182692.3 /TIER=Stack /STK=15 /UG=Mm.182692 /LL=54673 /UG_GENE=Sh3glb1 /UG_TITLE=SH3-domain GRB2-like B1 (endophilin)
1455485_x_at	5731.2	P	0.00024	-1.3	-2.46	D	0.99998	2e-05	gb:AI324936 /DB_XREF=gi:4059365 /DB_XREF=mb49d08.x1 /CLONE=IMAGE:332751 /FEA=EST /CNT=24 /TID=Mm.13020.6 /TIER=Stack /STK=12 /UG=Mm.13020 /LL=22121 /UG_GENE=Rpl13a /UG_TITLE=ribosomal protein L13a
1460167_at	457.2	P	0.00024	-1.3	-2.46	D	0.99956	0.00044	gb:BC012407.1 /DB_XREF=gi:15214564 /FEA=FLmRNA /CNT=262 /TID=Mm.30250.1 /TIER=FL+Stack /STK=175 /UG=Mm.30250 /LL=28121 /UG_GENE=D18Wsu181e /DEF=Mus musculus, clone MGC:18699 IMAGE:4191228, mRNA, complete cds. /PROD=Unknown (protein for MGC:18699) /FL=gb:BC012407.1 gb:NM_138600.1
AFFX-DapX-M_at	333.5	P	0.00228	-1.4	-2.64	D	1	0	L38424 B subtilis dapB, jojF, jojG genes corresponding to nucleotides 1358-3197 of L38424 (-5, -M, -3 represent transcript regions 5 prime, Middle, and 3 prime respectively)
AFFX-r2-Bs-phe-3_at	275.6	P	0.00073	-1.4	-2.64	D	0.99995	5e-05	B. subtilis /GEN=pheB /DB_XREF=gb:M24537.1 /NOTE=SIF corresponding to nucleotides 2897-3200 of gb:M24537.1, not 100% identical /DEF=Bacillus subtillis sporulation protein (spoOB), GTP-binding protein (obg), phenylalanine biosynthesis associated protein (pheB), and monofunctional prephenate dehydratase (pheA) genes, complete cds.
1416020_a_at	2699.8	P	0.00024	-1.4	-2.64	D	0.99998	2e-05	gb:NM_007506.1 /DB_XREF=gi:6680749 /GEN=Atp5g1 /FEA=FLmRNA /CNT=253 /TID=Mm.258.1 /TIER=FL+Stack /STK=143 /UG=Mm.258 /LL=11951 /DEF=Mus musculus ATP synthase, H+ transporting, mitochondrial F0 complex, subunit c (subunit 9), isoform 1 (Atp5g1), mRNA. /PROD=ATP synthase, H+ transporting, mitochondrial F0complex, subunit c (subunit 9), isoform 1 /FL=gb:NM_007506.1 gb:L19737.1 gb:BC003854.1
1416494_at	1032.8	P	0.00195	-1.4	-2.64	D	0.99997	4e-05	gb:NM_134104.1 /DB_XREF=gi:19527333 /GEN=AI256693 /FEA=FLmRNA /CNT=117 /TID=Mm.42805.1 /TIER=FL+Stack /STK=85 /UG=Mm.42805 /LL=106171 /DEF=Mus musculus expressed sequence AI256693 (AI256693), mRNA. /PROD=expressed sequence AI256693 /FL=gb:NM_134104.1 gb:BC002163.1
1417246_at	96.4	A	0.12964	-1.4	-2.64	D	0.99961	0.00039	gb:NM_007376.1 /DB_XREF=gi:6680607 /GEN=A2m /FEA=FLmRNA /CNT=190 /TID=Mm.27725.1 /TIER=FL+Stack /STK=51 /UG=Mm.27725 /LL=11287 /DEF=Mus musculus alpha-2-macroglobulin (A2m), mRNA. /PROD=alpha-2-macroglobulin /FL=gb:M93264.1 gb:NM_007376.1
1417892_a_at	293.9	P	0.00024	-1.4	-2.64	D	0.99992	8e-05	gb:NM_022433.1 /DB_XREF=gi:11967962 /GEN=Sirt3 /FEA=FLmRNA /CNT=52 /TID=Mm.41625.1 /TIER=FL+Stack /STK=34 /UG=Mm.41625 /LL=64384 /DEF=Mus musculus sirtuin 3 (silent mating type information regulation 2, homolog) 3 (S. cerevisiae) (Sirt3), mRNA. /PROD=sirtuin 3 /FL=gb:NM_022433.1 gb:AF299338.1
1417972_s_at	572.1	P	0.00024	-1.4	-2.64	D	0.99961	0.00039	gb:NM_026398.1 /DB_XREF=gi:20270199 /GEN=1500019J17Rik /FEA=FLmRNA /CNT=44 /TID=Mm.24636.1 /TIER=FL+Stack /STK=32 /UG=Mm.24636 /LL=100903 /DEF=Mus musculus RIKEN cDNA 1500019J17 gene (1500019J17Rik), mRNA. /PROD=RNase MRPRNase P protein-like /FL=gb:BC022670.1 gb:NM_026398.1
1418249_at	365.8	A	0.27417	-1.4	-2.64	D	0.99976	0.00024	gb:NM_007761.1 /DB_XREF=gi:6681010 /GEN=Crcp /FEA=FLmRNA /CNT=56 /TID=Mm.18072.1 /TIER=FL+Stack /STK=27 /UG=Mm.18072 /LL=12909 /DEF=Mus musculus calcitonin gene-related peptide-receptor component protein (Crcp), mRNA. /PROD=calcitonin gene-related peptide-receptorcomponent protein /FL=gb:AF118271.1 gb:AF028242.1 gb:BC012676.1 gb:NM_007761.1
1418395_at	446.9	P	0.00024	-1.4	-2.64	D	0.99989	0.00011	gb:NM_026183.1 /DB_XREF=gi:13385693 /GEN=1300013J15Rik /FEA=FLmRNA /CNT=44 /TID=Mm.100741.1 /TIER=FL+Stack /STK=24 /UG=Mm.100741 /LL=67473 /DEF=Mus musculus RIKEN cDNA 1300013J15 gene (1300013J15Rik), mRNA. /PROD=RIKEN cDNA 1300013J15 /FL=gb:NM_026183.1
1419441_at	7163.9	P	0.00024	-1.4	-2.64	D	0.99998	2e-05	gb:NM_007475.1 /DB_XREF=gi:6671568 /GEN=Arbp /FEA=FLmRNA /CNT=149 /TID=Mm.5286.1 /TIER=FL+Stack /STK=9 /UG=Mm.5286 /LL=11837 /DEF=Mus musculus acidic ribosomal phosphoprotein PO (Arbp), mRNA. /PROD=acidic ribosomal phosphoprotein PO /FL=gb:NM_007475.1 gb:BC003833.1 gb:BC011106.1 gb:BC011291.1
1420657_at	599.4	P	0.00073	-1.4	-2.64	D	0.99961	0.00039	gb:AB010742.1 /DB_XREF=gi:3062840 /FEA=FLmRNA /CNT=27 /TID=Mm.6254.1 /TIER=FL /STK=3 /UG=Mm.6254 /LL=22229 /UG_GENE=Ucp3 /DEF=Mus musculus mRNA for UCP3, complete cds. /PROD=UCP3 /FL=gb:AB010742.1 gb:AF030164.1 gb:NM_009464.1 gb:AB008216.1 gb:AF053352.1 gb:AF032902.1
1422157_a_at	230	P	0.00024	-1.4	-2.64	D	0.99997	3e-05	gb:NM_008403.1 /DB_XREF=gi:6680487 /GEN=Itgb1bp1 /FEA=FLmRNA /CNT=5 /TID=Mm.6818.1 /TIER=FL /STK=1 /UG=Mm.6818 /LL=16413 /DEF=Mus musculus integrin beta 1 binding protein 1 (Itgb1bp1), mRNA. /PROD=integrin beta 1 binding protein 1 /FL=gb:NM_008403.1
1422500_at	848.2	P	0.00024	-1.4	-2.64	D	0.99998	2e-05	gb:AV030425 /DB_XREF=gi:16356549 /DB_XREF=AV030425 /CLONE=1500012E04 /FEA=FLmRNA /CNT=215 /TID=Mm.196043.1 /TIER=Stack /STK=65 /UG=Mm.196043 /LL=67834 /UG_GENE=Idh3a /UG_TITLE=isocitrate dehydrogenase 3 (NAD+) alpha /FL=gb:NM_029573.1
1422627_a_at	1031.8	P	0.00195	-1.4	-2.64	D	0.99998	2e-05	gb:BF581250 /DB_XREF=gi:11654962 /DB_XREF=602100475F1 /CLONE=IMAGE:4220179 /FEA=FLmRNA /CNT=107 /TID=Mm.26763.1 /TIER=Stack /STK=21 /UG=Mm.26763 /LL=59030 /UG_GENE=Mkks /UG_TITLE=McKusick-Kaufman syndrome protein /FL=gb:AF254074.1 gb:NM_021527.1
1422732_at	1009.9	P	0.00024	-1.4	-2.64	D	0.99996	4e-05	gb:BB797282 /DB_XREF=gi:16966901 /DB_XREF=BB797282 /CLONE=G630004N13 /FEA=FLmRNA /CNT=135 /TID=Mm.197493.1 /TIER=ConsEnd /STK=2 /UG=Mm.197493 /LL=67811 /UG_GENE=1300003F06Rik /UG_TITLE=RIKEN cDNA 1300003F06 gene /FL=gb:NM_026389.1 gb:BC006833.1 gb:BC012879.1
1423166_at	445.5	P	0.00195	-1.4	-2.64	D	0.99997	3e-05	gb:AK004192.1 /DB_XREF=gi:12835286 /GEN=Cd36 /FEA=FLmRNA /CNT=240 /TID=Mm.18628.1 /TIER=Stack /STK=35 /UG=Mm.18628 /LL=12491 /UG_TITLE=CD36 antigen /DEF=Mus musculus 18 days embryo whole body cDNA, RIKEN full-length enriched library, clone:1110046N03:CD36 antigen, full insert sequence. /FL=gb:NM_007643.1 gb:L23108.1
1423625_a_at	1035.8	P	0.00024	-1.4	-2.64	D	0.99997	3e-05	gb:AV053772 /DB_XREF=gi:16380645 /DB_XREF=AV053772 /CLONE=1810028E18 /FEA=FLmRNA /CNT=42 /TID=Mm.26644.1 /TIER=Stack /STK=8 /UG=Mm.26644 /LL=67713 /UG_GENE=1810055D05Rik /UG_TITLE=RIKEN cDNA 1810055D05 gene /FL=gb:NM_026332.1
1423854_a_at	206.5	P	0.00293	-1.4	-2.64	D	0.99987	0.00013	gb:BC008101.1 /DB_XREF=gi:14198067 /FEA=FLmRNA /CNT=110 /TID=Mm.182194.1 /TIER=FL+Stack /STK=90 /UG=Mm.182194 /LL=68939 /UG_GENE=1190017B18Rik /DEF=Mus musculus, Similar to hypothetical protein MGC2827, clone MGC:7064 IMAGE:3156762, mRNA, complete cds. /PROD=Similar to hypothetical protein MGC2827 /FL=gb:BC008101.1
1423966_at	128.7	P	0.00024	-1.4	-2.64	D	0.99998	2e-05	gb:BB038546 /DB_XREF=gi:15403762 /DB_XREF=BB038546 /CLONE=5930438M22 /FEA=FLmRNA /CNT=189 /TID=Mm.20838.1 /TIER=Stack /STK=29 /UG=Mm.20838 /LL=171486 /UG_GENE=Mic2l1 /UG_TITLE=MIC2 (monoclonal Imperial Cancer Research Fund 2)-like 1 /FL=gb:AY078163.1
1424324_at	288	P	0.00024	-1.4	-2.64	D	0.99998	2e-05	gb:BC008220.1 /DB_XREF=gi:14198314 /FEA=FLmRNA /CNT=106 /TID=Mm.21177.1 /TIER=FL+Stack /STK=37 /UG=Mm.21177 /DEF=Mus musculus, clone MGC:11878 IMAGE:3598095, mRNA, complete cds. /PROD=Unknown (protein for MGC:11878) /FL=gb:BC008220.1
1425677_a_at	921.9	P	0.00122	-1.4	-2.64	D	0.99995	5e-05	gb:M84756.1 /DB_XREF=gi:191939 /GEN=Ank-1 /FEA=FLmRNA /CNT=8 /TID=Mm.4789.2 /TIER=FL /STK=1 /UG=Mm.4789 /LL=11733 /DEF=Mouse red cell ankyrin (Ank-1) mRNA, complete cds. /PROD=ankyrin /FL=gb:M84756.1
1428076_s_at	1737.8	P	0.00073	-1.4	-2.64	D	0.99995	5e-05	gb:BG968046 /DB_XREF=gi:14355683 /DB_XREF=602832427F1 /CLONE=IMAGE:4986991 /FEA=mRNA /CNT=246 /TID=Mm.29065.1 /TIER=Stack /STK=150 /UG=Mm.29065 /LL=68194 /UG_GENE=0610006N12Rik /UG_TITLE=RIKEN cDNA 0610006N12 gene
1433603_at	5162.1	P	0.00073	-1.4	-2.64	D	0.99983	0.00017	gb:C88200 /DB_XREF=gi:2920157 /DB_XREF=C88200 /CLONE=J0258D11 /FEA=EST /CNT=109 /TID=Mm.29897.1 /TIER=Stack /STK=83 /UG=Mm.29897 /UG_TITLE=ESTs, Highly similar to NUMM MOUSE NADH-UBIQUINONE OXIDOREDUCTASE 13 KD-A SUBUNIT (M.musculus)
1434648_a_at	702	P	0.00024	-1.4	-2.64	D	0.99985	0.00015	gb:BI903794 /DB_XREF=gi:16165851 /DB_XREF=603166157F1 /CLONE=IMAGE:5254167 /FEA=EST /CNT=86 /TID=Mm.741.2 /TIER=Stack /STK=27 /UG=Mm.741 /LL=16592 /UG_GENE=Fabp5 /UG_TITLE=fatty acid binding protein 5, epidermal
1435258_at	115.5	A	0.06763	-1.4	-2.64	D	0.99995	5e-05	gb:AW551717 /DB_XREF=gi:7197056 /DB_XREF=L0201G04-3 /CLONE=L0201G04 /FEA=EST /CNT=30 /TID=Mm.5769.1 /TIER=Stack /STK=18 /UG=Mm.5769 /LL=51875 /UG_GENE=D2Ertd217e /UG_TITLE=DNA segment, Chr 2, ERATO Doi 217, expressed
1435712_a_at	2192	P	0.00024	-1.4	-2.64	D	0.99979	0.00021	gb:AW907444 /DB_XREF=gi:8072741 /DB_XREF=uq46f11.x1 /CLONE=IMAGE:2812461 /FEA=EST /CNT=15 /TID=Mm.42790.5 /TIER=Stack /STK=14 /UG=Mm.42790 /LL=20084 /UG_GENE=Rps18 /UG_TITLE=ribosomal protein S18
1437100_x_at	545.2	P	0.00195	-1.4	-2.64	D	0.99903	0.00097	gb:BB206220 /DB_XREF=gi:8871173 /DB_XREF=BB206220 /CLONE=A430073H16 /FEA=EST /CNT=26 /TID=Mm.30018.2 /TIER=Stack /STK=26 /UG=Mm.30018 /UG_TITLE=Mus musculus, serine threonine kinase pim3, clone MGC:27707 IMAGE:4924687, mRNA, complete cds
1438206_a_at	565.6	P	0.00122	-1.4	-2.64	D	0.99998	2e-05	gb:AI266964 /DB_XREF=gi:3885122 /DB_XREF=uj09b12.x1 /CLONE=IMAGE:1891391 /FEA=EST /CNT=26 /TID=Mm.44218.2 /TIER=Stack /STK=11 /UG=Mm.44218 /LL=66460 /UG_GENE=2610042O14Rik /UG_TITLE=RIKEN cDNA 2610042O14 gene
1439266_a_at	120.8	P	0.00024	-1.4	-2.64	D	0.99951	0.00049	gb:AV260647 /DB_XREF=gi:6248106 /DB_XREF=AV260647 /CLONE=4930414K22 /FEA=EST /CNT=9 /TID=Mm.22358.3 /TIER=Stack /STK=8 /UG=Mm.22358 /LL=67005 /UG_GENE=1500004O14Rik /UG_TITLE=RIKEN cDNA 1500004O14 gene
1448190_at	596.2	P	0.00024	-1.4	-2.64	D	0.99914	0.00087	gb:NM_025796.1 /DB_XREF=gi:13385265 /GEN=Mrpl33 /FEA=FLmRNA /CNT=210 /TID=Mm.30152.1 /TIER=FL+Stack /STK=138 /UG=Mm.30152 /LL=66845 /DEF=Mus musculus mitochondrial ribosomal protein L33 (Mrpl33), mRNA. /PROD=RIKEN cDNA 0610009M10 /FL=gb:NM_025796.1 gb:AB049651.1
1448292_at	2732.1	P	0.00293	-1.4	-2.64	D	0.99998	2e-05	gb:NM_025650.1 /DB_XREF=gi:13385111 /GEN=0710008D09Rik /FEA=FLmRNA /CNT=200 /TID=Mm.43162.1 /TIER=FL+Stack /STK=100 /UG=Mm.43162 /LL=66594 /DEF=Mus musculus RIKEN cDNA 0710008D09 gene (0710008D09Rik), mRNA. /PROD=RIKEN cDNA 0710008D09 /FL=gb:NM_025650.1
1448304_a_at	653.4	P	0.00024	-1.4	-2.64	D	0.99945	0.00055	gb:NM_024287.1 /DB_XREF=gi:13195673 /GEN=Rab6 /FEA=FLmRNA /CNT=396 /TID=Mm.28650.1 /TIER=FL+Stack /STK=97 /UG=Mm.28650 /LL=19346 /DEF=Mus musculus RAB6, member RAS oncogene family (Rab6), mRNA. /PROD=RAB6, member RAS oncogene family /FL=gb:NM_024287.1
1448427_at	2209.8	P	0.00024	-1.4	-2.64	D	0.99998	2e-05	gb:NM_025987.1 /DB_XREF=gi:13385491 /GEN=Ndufa6 /FEA=FLmRNA /CNT=97 /TID=Mm.27570.1 /TIER=FL+Stack /STK=75 /UG=Mm.27570 /LL=67130 /DEF=Mus musculus NADH dehydrogenase (ubiquinone) 1 alpha subcomplex, 6 (14kD, B14) (Ndufa6), mRNA. /PROD=NADH dehydrogenase (ubiquinone) 1 alphasubcomplex, 6 (14kD, B14) /FL=gb:NM_025987.1
1448491_at	2567.9	P	0.00293	-1.4	-2.64	D	0.99998	2e-05	gb:NM_016772.1 /DB_XREF=gi:7949036 /GEN=Ech1 /FEA=FLmRNA /CNT=192 /TID=Mm.2112.1 /TIER=FL+Stack /STK=66 /UG=Mm.2112 /LL=51798 /DEF=Mus musculus enoyl coenzyme A hydratase 1, peroxisomal (Ech1), mRNA. /PROD=enoyl coenzyme A hydratase 1, peroxisomal /FL=gb:AF030343.1 gb:NM_016772.1
1448739_x_at	1977.8	P	0.00024	-1.4	-2.64	D	0.99983	0.00017	gb:NM_011296.1 /DB_XREF=gi:6755367 /GEN=Rps18 /FEA=FLmRNA /CNT=56 /TID=Mm.42790.1 /TIER=FL+Stack /STK=43 /UG=Mm.42790 /LL=20084 /DEF=Mus musculus ribosomal protein S18 (Rps18), mRNA. /PROD=ribosomal protein S18 /FL=gb:NM_011296.1 gb:M76763.1
1448740_at	981.4	P	0.00586	-1.4	-2.64	D	0.99998	2e-05	gb:NM_021329.1 /DB_XREF=gi:10946639 /GEN=Rangnrf-pending /FEA=FLmRNA /CNT=83 /TID=Mm.143774.1 /TIER=FL+Stack /STK=43 /UG=Mm.143774 /LL=57785 /DEF=Mus musculus RAN guanine nucleotide release factor (Rangnrf-pending), mRNA. /PROD=RAN guanine nucleotide release factor /FL=gb:NM_021329.1 gb:AF243512.1
1448808_a_at	6985.3	P	0.00024	-1.4	-2.64	D	0.99998	2e-05	gb:NM_008705.1 /DB_XREF=gi:6679077 /GEN=Nme2 /FEA=FLmRNA /CNT=116 /TID=Mm.1125.1 /TIER=FL+Stack /STK=38 /UG=Mm.1125 /LL=18103 /DEF=Mus musculus expressed in non-metastatic cells 2, protein (NM23B) (nucleoside diphosphate kinase) (Nme2), mRNA. /PROD=expressed in non-metastatic cells 2, protein(NM23B) /FL=gb:NM_008705.1
1449349_at	231.9	P	0.00073	-1.4	-2.64	D	0.99956	0.00044	gb:NM_008637.1 /DB_XREF=gi:6678949 /GEN=Nudt1 /FEA=FLmRNA /CNT=33 /TID=Mm.2539.1 /TIER=FL+Stack /STK=13 /UG=Mm.2539 /LL=17766 /DEF=Mus musculus nudix (nucleoside diphosphate linked moiety X)-type motif 1 (Nudt1), mRNA. /PROD=mutT (E. coli) human homolog (8-oxo-dGTPase) /FL=gb:D49956.1 gb:BC021940.1 gb:NM_008637.1
1451096_at	4047.9	P	0.00195	-1.4	-2.64	D	0.99998	2e-05	gb:BC016097.1 /DB_XREF=gi:16359269 /FEA=FLmRNA /CNT=246 /TID=Mm.21669.1 /TIER=FL+Stack /STK=126 /UG=Mm.21669 /DEF=Mus musculus, Similar to NADH dehydrogenase (ubiquinone) Fe-S protein 2 (49kD) (NADH-coenzyme Q reductase), clone MGC:27667 IMAGE:4910260, mRNA, complete cds. /PROD=Similar to NADH dehydrogenase (ubiquinone) Fe-Sprotein 2 (49kD) (NADH-coenzyme Q reductase) /FL=gb:BC016097.1
1451217_a_at	2228.7	P	0.00024	-1.4	-2.64	D	0.99998	2e-05	gb:BC008259.1 /DB_XREF=gi:14198398 /FEA=FLmRNA /CNT=97 /TID=Mm.144286.1 /TIER=FL+Stack /STK=57 /UG=Mm.144286 /LL=66541 /UG_GENE=1500034J20Rik /DEF=Mus musculus, RIKEN cDNA 1500034J20 gene, clone MGC:6290 IMAGE:2649406, mRNA, complete cds. /PROD=RIKEN cDNA 1500034J20 gene /FL=gb:BC008259.1
1451346_at	90.7	A	0.06763	-1.4	-2.64	D	0.99973	0.00027	gb:BG075139 /DB_XREF=gi:12557708 /DB_XREF=H3143G03-3 /CLONE=H3143G03 /FEA=FLmRNA /CNT=98 /TID=Mm.28500.1 /TIER=Stack /STK=11 /UG=Mm.28500 /LL=66902 /UG_GENE=1300019I21Rik /UG_TITLE=RIKEN cDNA 1300019I21 gene /FL=gb:AB056100.1 gb:BC003858.1
1452046_a_at	525.9	P	0.00024	-1.4	-2.64	D	0.99965	0.00035	gb:BG071790 /DB_XREF=gi:12554370 /DB_XREF=H3103D01-3 /CLONE=H3103D01 /FEA=FLmRNA /CNT=349 /TID=Mm.7793.4 /TIER=Stack /STK=39 /UG=Mm.7793 /LL=19047 /UG_GENE=Ppp1cc /UG_TITLE=protein phosphatase 1, catalytic subunit, gamma isoform /FL=gb:BC021646.1 gb:BC010613.1
1452061_s_at	110.8	P	0.00024	-1.4	-2.64	D	0.99956	0.00044	gb:AK006314.1 /DB_XREF=gi:12839348 /GEN=Spnr /FEA=FLmRNA /CNT=67 /TID=Mm.30670.2 /TIER=Stack /STK=26 /UG=Mm.30670 /LL=20744 /UG_TITLE=spermatid perinuclear RNA binding protein /DEF=Mus musculus adult male testis cDNA, RIKEN full-length enriched library, clone:1700024P20:spermatid perinuclear RNA binding protein, full insert sequence. /FL=gb:BC014710.1
1452128_a_at	346.2	P	0.00293	-1.4	-2.64	D	0.99997	3e-05	gb:AI462244 /DB_XREF=gi:4316274 /DB_XREF=ub71d02.x1 /CLONE=IMAGE:1383171 /FEA=FLmRNA /CNT=53 /TID=Mm.30557.9 /TIER=Stack /STK=10 /UG=Mm.30557 /LL=21473 /UG_GENE=Tcra /UG_TITLE=T-cell receptor alpha chain /FL=gb:BC021313.1
1455571_x_at	3106.5	P	0.00024	-1.4	-2.64	D	0.99998	2e-05	gb:AV015462 /DB_XREF=gi:4792454 /DB_XREF=AV015462 /CLONE=1110059K06 /FEA=EST /CNT=11 /TID=Mm.34246.3 /TIER=Stack /STK=11 /UG=Mm.34246 /LL=12313 /UG_GENE=Calm1 /UG_TITLE=calmodulin 1
1455640_a_at	1672.3	P	0.01416	-1.4	-2.64	D	0.99961	0.00039	gb:AV053127 /DB_XREF=gi:5152874 /DB_XREF=AV053127 /CLONE=1810025B13 /FEA=EST /CNT=10 /TID=Mm.3533.3 /TIER=Stack /STK=10 /UG=Mm.3533 /LL=56551 /UG_GENE=Txn2 /UG_TITLE=thioredoxin 2
1460434_at	1196	P	0.00073	-1.4	-2.64	D	0.99997	3e-05	gb:AI510221 /DB_XREF=gi:4409126 /DB_XREF=vb95e05.y1 /CLONE=IMAGE:764768 /FEA=mRNA /CNT=115 /TID=Mm.24543.2 /TIER=Stack /STK=21 /UG=Mm.24543 /LL=67391 /UG_GENE=4833415N24Rik /UG_TITLE=RIKEN cDNA 4833415N24 gene
1416567_s_at	2545.9	P	0.00024	-1.5	-2.83	D	0.99998	2e-05	gb:NM_025983.1 /DB_XREF=gi:13385483 /GEN=2410043G19Rik /FEA=FLmRNA /CNT=132 /TID=Mm.20841.1 /TIER=FL+Stack /STK=81 /UG=Mm.20841 /LL=67126 /DEF=Mus musculus RIKEN cDNA 2410043G19 gene (2410043G19Rik), mRNA. /PROD=RIKEN cDNA 2410043G19 /FL=gb:BC024339.1 gb:NM_025983.1
1417227_at	839.8	P	0.00195	-1.5	-2.83	D	0.99983	0.00017	gb:NM_023644.1 /DB_XREF=gi:12965186 /GEN=Mccc1 /FEA=FLmRNA /CNT=96 /TID=Mm.154589.1 /TIER=FL+Stack /STK=52 /UG=Mm.154589 /LL=72039 /DEF=Mus musculus methylcrotonoyl-Coenzyme A carboxylase 1 (alpha) (Mccc1), mRNA. /PROD=methylcrotonoyl-Coenzyme A carboxylase 1(alpha) /FL=gb:AF310338.1 gb:NM_023644.1 gb:BC021382.1
1417841_at	1638.2	P	0.04614	-1.5	-2.83	D	0.99969	0.00031	gb:AF309644.1 /DB_XREF=gi:10954088 /GEN=Pxmp2 /FEA=FLmRNA /CNT=66 /TID=Mm.21853.1 /TIER=FL+Stack /STK=35 /UG=Mm.21853 /LL=19301 /DEF=Mus musculus strain 129Sv 22 kDa peroxisomal membrane protein PMP22 (Pxmp2) mRNA, complete cds. /PROD=22 kDa peroxisomal membrane protein PMP22 /FL=gb:NM_008993.1 gb:AF309644.1
1418472_at	108.8	P	0.00293	-1.5	-2.83	D	0.99969	0.00031	gb:BC024934.1 /DB_XREF=gi:19354303 /FEA=FLmRNA /CNT=50 /TID=Mm.20317.1 /TIER=FL+Stack /STK=23 /UG=Mm.20317 /LL=11484 /UG_GENE=Aspa /DEF=Mus musculus, aspartoacylase (aminoacylase) 2, clone MGC:28302 IMAGE:4012726, mRNA, complete cds. /PROD=aspartoacylase (aminoacylase) 2 /FL=gb:NM_023113.1 gb:BC024934.1 gb:AF212998.1
1419805_s_at	96.1	P	0.01856	-1.5	-2.83	D	0.99914	0.00087	gb:C79210 /DB_XREF=gi:2519540 /DB_XREF=C79210 /CLONE=J0062E02 /FEA=EST /CNT=1 /TID=Mm.197950.1 /TIER=ConsEnd /STK=1 /UG=Mm.197950 /LL=97873 /UG_GENE=C79210 /UG_TITLE=expressed sequence C79210
1420613_at	2669.1	P	0.00024	-1.5	-2.83	D	0.99998	2e-05	gb:BE134116 /DB_XREF=gi:8596616 /DB_XREF=ug16c03.x1 /CLONE=IMAGE:1531780 /FEA=FLmRNA /CNT=300 /TID=Mm.6355.1 /TIER=Stack /STK=56 /UG=Mm.6355 /LL=19244 /UG_GENE=Ptp4a2 /UG_TITLE=protein tyrosine phosphatase 4a2 /FL=gb:AF035644.1 gb:NM_008974.1
1420614_at	744.8	P	0.00073	-1.5	-2.83	D	0.99997	3e-05	gb:BG069784 /DB_XREF=gi:12552353 /DB_XREF=H3080B01-3 /CLONE=H3080B01 /FEA=FLmRNA /CNT=208 /TID=Mm.29150.1 /TIER=Stack /STK=11 /UG=Mm.29150 /LL=67117 /UG_GENE=2310075M16Rik /UG_TITLE=RIKEN cDNA 2310075M16 gene /FL=gb:NM_025975.2
1422852_at	637.1	P	0.00122	-1.5	-2.83	D	0.99951	0.00049	gb:NM_019686.1 /DB_XREF=gi:9790084 /GEN=Kip2-pending /FEA=FLmRNA /CNT=53 /TID=Mm.42192.1 /TIER=FL+Stack /STK=9 /UG=Mm.42192 /LL=56506 /DEF=Mus musculus kinase interacting protein 2 (Kip2-pending), mRNA. /PROD=kinase interacting protein 2 /FL=gb:AB016080.1 gb:BC005739.1 gb:NM_019686.1
1424003_at	88.4	P	0.00195	-1.5	-2.83	D	0.99965	0.00035	gb:BC027296.1 /DB_XREF=gi:20071219 /FEA=FLmRNA /CNT=98 /TID=Mm.17631.1 /TIER=FL+Stack /STK=66 /UG=Mm.17631 /LL=74653 /UG_GENE=4930444A02Rik /DEF=Mus musculus, RIKEN cDNA 4930444A02 gene, clone MGC:28309 IMAGE:4013355, mRNA, complete cds. /PROD=RIKEN cDNA 4930444A02 gene /FL=gb:BC027296.1
1424004_x_at	109.4	P	0.00806	-1.5	-2.83	D	0.99995	5e-05	gb:BC027296.1 /DB_XREF=gi:20071219 /FEA=FLmRNA /CNT=98 /TID=Mm.17631.1 /TIER=FL+Stack /STK=66 /UG=Mm.17631 /LL=74653 /UG_GENE=4930444A02Rik /DEF=Mus musculus, RIKEN cDNA 4930444A02 gene, clone MGC:28309 IMAGE:4013355, mRNA, complete cds. /PROD=RIKEN cDNA 4930444A02 gene /FL=gb:BC027296.1
1426261_s_at	40.2	A	0.11157	-1.5	-2.83	D	0.9999	0.0001	gb:D87867.1 /DB_XREF=gi:1660991 /GEN=UGP1a1 /FEA=FLmRNA /CNT=20 /TID=Mm.42472.3 /TIER=FL+Stack /STK=19 /UG=Mm.42472 /LL=22236 /DEF=Mus musculus mRNA for phenol UDP-glucuronosyltransferase, complete cds. /PROD=phenol UDP-glucuronosyltransferase /FL=gb:D87867.1
1428263_a_at	488.2	M	0.05615	-1.5	-2.83	D	0.99991	9e-05	gb:AK019181.1 /DB_XREF=gi:12859255 /FEA=mRNA /CNT=96 /TID=Mm.153758.2 /TIER=Stack /STK=64 /UG=Mm.153758 /LL=67673 /UG_GENE=0610040H15Rik /UG_TITLE=RIKEN cDNA 0610040H15 gene /DEF=Mus musculus 10 days embryo whole body cDNA, RIKEN full-length enriched library, clone:2610311H19:homolog to RNA POLYMERASE II TRANSCRIPTION FACTOR SIII P18 SUBUNIT, full insert sequence.
1429382_at	586.2	P	0.01856	-1.5	-2.83	D	0.99992	8e-05	gb:AV253376 /DB_XREF=gi:16387902 /DB_XREF=AV253376 /CLONE=4833447E13 /FEA=mRNA /CNT=66 /TID=Mm.3077.3 /TIER=Stack /STK=26 /UG=Mm.3077 /LL=12355 /UG_GENE=Nr1i3 /UG_TITLE=nuclear receptor subfamily 1, group I, member 3
1432466_a_at	480.5	P	0.02393	-1.5	-2.83	D	0.99998	2e-05	gb:AK019319.1 /DB_XREF=gi:12859466 /GEN=Apoe /FEA=mRNA /CNT=1 /TID=Mm.138866.2 /TIER=ConsEnd /STK=0 /UG=Mm.138866 /LL=11816 /UG_TITLE=apolipoprotein E /DEF=Mus musculus adult male hippocampus cDNA, RIKEN full-length enriched library, clone:2900019G12:apolipoprotein E, full insert sequence.
1434427_a_at	200.8	P	0.00293	-1.5	-2.83	D	0.99998	2e-05	gb:BB246182 /DB_XREF=gi:16355455 /DB_XREF=BB246182 /CLONE=A730013I06 /FEA=EST /CNT=47 /TID=Mm.15571.4 /TIER=Stack /STK=33 /UG=Mm.15571 /LL=11820 /UG_GENE=App /UG_TITLE=amyloid beta (A4) precursor protein
1435371_x_at	398.2	P	0.0376	-1.5	-2.83	D	0.99973	0.00027	gb:AI315015 /DB_XREF=gi:4030282 /DB_XREF=uj23d06.x1 /CLONE=IMAGE:1920779 /FEA=EST /CNT=21 /TID=Mm.120807.2 /TIER=Stack /STK=17 /UG=Mm.120807 /LL=104158 /UG_GENE=Ces3 /UG_TITLE=carboxylesterase 3
1435755_at	347	P	0.0376	-1.5	-2.83	D	0.99981	0.00019	gb:BB609468 /DB_XREF=gi:15390291 /DB_XREF=BB609468 /CLONE=0610010J22 /FEA=EST /CNT=25 /TID=Mm.181765.2 /TIER=Stack /STK=13 /UG=Mm.181765 /UG_TITLE=Mus musculus 8 days embryo whole body cDNA, RIKEN full-length enriched library, clone:5730409M10:CCAATenhancer binding protein alpha (CEBP), related sequence 1, full insert sequence
1448474_at	897.9	P	0.00024	-1.5	-2.83	D	0.99938	0.00062	gb:NM_021605.1 /DB_XREF=gi:11037791 /GEN=Nek7 /FEA=FLmRNA /CNT=196 /TID=Mm.143817.1 /TIER=FL+Stack /STK=68 /UG=Mm.143817 /LL=59125 /DEF=Mus musculus NIMA (never in mitosis gene a)-related expressed kinase 7 (Nek7), mRNA. /PROD=NIMA (never in mitosis gene a)-related expressedkinase 7 /FL=gb:NM_021605.1 gb:AF217650.1
1448685_at	1754.1	P	0.00024	-1.5	-2.83	D	0.99998	2e-05	gb:NM_026063.1 /DB_XREF=gi:13385559 /GEN=2900010M23Rik /FEA=FLmRNA /CNT=82 /TID=Mm.29700.1 /TIER=FL+Stack /STK=47 /UG=Mm.29700 /LL=67267 /DEF=Mus musculus RIKEN cDNA 2900010M23 gene (2900010M23Rik), mRNA. /PROD=RIKEN cDNA 2900010M23 /FL=gb:NM_026063.1
1448794_s_at	96.3	P	0.01074	-1.5	-2.83	D	0.99993	7e-05	gb:BG067003 /DB_XREF=gi:12549572 /DB_XREF=H3049E03-3 /CLONE=H3049E03 /FEA=FLmRNA /CNT=94 /TID=Mm.2467.1 /TIER=Stack /STK=8 /UG=Mm.2467 /LL=22792 /UG_GENE=Zrf2 /UG_TITLE=zuotin related factor 2 /FL=gb:NM_009584.1 gb:D63784.1
1448819_at	341.3	P	0.03027	-1.5	-2.83	D	0.99997	3e-05	gb:NM_026030.1 /DB_XREF=gi:14149755 /GEN=Eif2s2 /FEA=FLmRNA /CNT=448 /TID=Mm.29859.1 /TIER=FL+Stack /STK=37 /UG=Mm.29859 /LL=67204 /DEF=Mus musculus eukaryotic translation initiation factor 2, subunit 2 (beta, 38kDa) (Eif2s2), mRNA. /PROD=eukaryotic translation initiation factor 2,subunit 2 (beta, 38kDa) /FL=gb:NM_026030.1 gb:BC003848.1
1450720_at	348.7	P	0.0376	-1.5	-2.83	D	0.99965	0.00035	gb:NM_021330.1 /DB_XREF=gi:10946641 /GEN=Acp1 /FEA=FLmRNA /CNT=167 /TID=Mm.26166.1 /TIER=FL+Stack /STK=16 /UG=Mm.26166 /LL=11431 /DEF=Mus musculus acid phosphatase 1, soluble (Acp1), mRNA. /PROD=acid phosphatase 1, soluble /FL=gb:NM_021330.1
1451448_a_at	908.5	P	0.00024	-1.5	-2.83	D	0.99997	3e-05	gb:BC026936.1 /DB_XREF=gi:20073225 /FEA=FLmRNA /CNT=35 /TID=Mm.7686.1 /TIER=FL+Stack /STK=19 /UG=Mm.7686 /LL=74319 /UG_GENE=1110005A03Rik /DEF=Mus musculus, RIKEN cDNA 1110005A03 gene, clone MGC:30958 IMAGE:4021089, mRNA, complete cds. /PROD=RIKEN cDNA 1110005A03 gene /FL=gb:BC026936.1
1451635_at	166.6	P	0.01074	-1.5	-2.83	D	0.99976	0.00024	gb:AB056443.1 /DB_XREF=gi:19032278 /GEN=mOAT6-S /FEA=FLmRNA /CNT=8 /TID=Mm.187584.2 /TIER=FL /STK=4 /UG=Mm.187584 /LL=171405 /DEF=Mus musculus mOAT6-S mRNA for organic anion transporter 6-S, complete cds. /PROD=organic anion transporter 6-S /FL=gb:AB056443.1
1451943_a_at	255.7	P	0.00122	-1.5	-2.83	D	0.99987	0.00013	gb:AF259673.1 /DB_XREF=gi:12005899 /GEN=Pp2ca1b /FEA=FLmRNA /CNT=1 /TID=Mm.3766.3 /TIER=FL /STK=1 /UG=Mm.3766 /LL=19042 /DEF=Mus musculus protein phosphatase 2C alpha 1b (Pp2ca1b) mRNA, complete cds. /PROD=protein phosphatase 2C alpha 1b /FL=gb:AF259673.1
1454964_at	571.8	P	0.00806	-1.5	-2.83	D	0.99998	2e-05	gb:BM210917 /DB_XREF=gi:17767931 /DB_XREF=C0672F03-3 /CLONE=C0672F03 /FEA=EST /CNT=65 /TID=Mm.28427.1 /TIER=Stack /STK=32 /UG=Mm.28427 /LL=16991 /UG_GENE=Lt1 /UG_TITLE=lurcher transcript 1
1455364_a_at	303.8	P	0.04614	-1.5	-2.83	D	0.99998	2e-05	gb:AI414989 /DB_XREF=gi:4258493 /DB_XREF=mb47c08.x1 /CLONE=IMAGE:332558 /FEA=EST /CNT=19 /TID=Mm.5281.3 /TIER=Stack /STK=15 /UG=Mm.5281 /LL=20115 /UG_GENE=Rps7 /UG_TITLE=ribosomal protein S7
1456069_at	133.6	P	0.00024	-1.5	-2.83	D	0.99994	6e-05	gb:BM117918 /DB_XREF=gi:17080936 /DB_XREF=L0858A06-3 /CLONE=L0858A06 /FEA=EST /CNT=20 /TID=Mm.3386.7 /TIER=Stack /STK=17 /UG=Mm.3386 /LL=13527 /UG_GENE=Dtna /UG_TITLE=dystrobrevin alpha
AFFX-r2-Bs-thr-3_s_at	216.2	P	0.03027	-1.6	-3.03	D	0.99989	0.00011	B. subtilis /GEN=thrB /DB_XREF=gb:X04603.1 /NOTE=SIF corresponding to nucleotides 1735-2143 of gb:X04603.1 /DEF=B. subtilis thrB and thrC genes for homoserine kinase and threonine synthase.
1416395_at	267.3	P	0.00073	-1.6	-3.03	D	0.99995	5e-05	gb:BC024625.1 /DB_XREF=gi:19354249 /FEA=FLmRNA /CNT=148 /TID=Mm.3624.1 /TIER=FL+Stack /STK=92 /UG=Mm.3624 /LL=14923 /UG_GENE=Guk1 /DEF=Mus musculus, guanylate kinase 1, clone MGC:25313 IMAGE:4485215, mRNA, complete cds. /PROD=guanylate kinase 1 /FL=gb:U53514.1 gb:NM_008193.1 gb:BC024625.1
1417083_at	587.3	P	0.00195	-1.6	-3.03	D	0.99989	0.00011	gb:NM_024171.1 /DB_XREF=gi:13324683 /GEN=1190006C12Rik /FEA=FLmRNA /CNT=99 /TID=Mm.20188.1 /TIER=FL+Stack /STK=57 /UG=Mm.20188 /LL=66212 /DEF=Mus musculus RIKEN cDNA 1190006C12 gene (1190006C12Rik), mRNA. /PROD=RIKEN cDNA 1190006C12 /FL=gb:BC002089.1 gb:NM_024171.1
1417823_at	96.6	A	0.36621	-1.6	-3.03	D	0.99979	0.00021	gb:NM_013847.1 /DB_XREF=gi:7305082 /GEN=Gcat /FEA=FLmRNA /CNT=97 /TID=Mm.18618.1 /TIER=FL+Stack /STK=35 /UG=Mm.18618 /LL=26912 /DEF=Mus musculus glycine C-acetyltransferase (2-amino-3-ketobutyrate-coenzyme A ligase) (Gcat), mRNA. /PROD=glycine C-acetyltransferase(2-amino-3-ketobutyrate-coenzyme A ligase) /FL=gb:NM_013847.1 gb:BC024107.1 gb:AF093403.1
1417982_at	334.7	P	0.00122	-1.6	-3.03	D	0.99997	3e-05	gb:AV257512 /DB_XREF=gi:16388412 /DB_XREF=AV257512 /CLONE=4921537P11 /FEA=FLmRNA /CNT=102 /TID=Mm.27136.1 /TIER=Stack /STK=8 /UG=Mm.27136 /LL=72999 /UG_GENE=2900053I11Rik /UG_TITLE=RIKEN cDNA 2900053I11 gene /FL=gb:BC024411.1 gb:BC015288.1 gb:NM_133748.1 gb:BC023067.1
1419148_at	96.7	A	0.27417	-1.6	-3.03	D	0.99903	0.00097	gb:AF059486.1 /DB_XREF=gi:3170616 /GEN=Doc6 /FEA=FLmRNA /CNT=20 /TID=Mm.10739.1 /TIER=FL+Stack /STK=13 /UG=Mm.10739 /LL=11567 /DEF=Mus musculus putative actin-binding protein DOC6 (Doc6) mRNA, complete cds. /PROD=putative actin-binding protein DOC6 /FL=gb:AF059486.1 gb:AF041448.1 gb:NM_009635.1
1419487_at	2075.5	P	0.00073	-1.6	-3.03	D	0.99996	4e-05	gb:NM_016749.1 /DB_XREF=gi:7949087 /GEN=Mybph /FEA=FLmRNA /CNT=42 /TID=Mm.125614.1 /TIER=FL+Stack /STK=9 /UG=Mm.125614 /LL=53311 /DEF=Mus musculus myosin binding protein H (Mybph), mRNA. /PROD=myosin binding protein H /FL=gb:NM_016749.1 gb:U68267.1
1420941_at	154.6	P	0.00073	-1.6	-3.03	D	0.99965	0.00035	gb:AK004165.1 /DB_XREF=gi:12835246 /GEN=Rgs5 /FEA=FLmRNA /CNT=77 /TID=Mm.20954.1 /TIER=Stack /STK=36 /UG=Mm.20954 /LL=19737 /UG_TITLE=regulator of G-protein signaling 5 /DEF=Mus musculus 18 days embryo whole body cDNA, RIKEN full-length enriched library, clone:1110038N04:regulator of G-protein signaling 5, full insert sequence. /FL=gb:U67188.1 gb:NM_009063.1
1421469_a_at	137.7	P	0.01416	-1.6	-3.03	D	0.99938	0.00062	gb:NM_011488.1 /DB_XREF=gi:6755671 /GEN=Stat5a /FEA=FLmRNA /CNT=6 /TID=Mm.4697.1 /TIER=FL /STK=2 /UG=Mm.4697 /LL=20850 /DEF=Mus musculus signal transducer and activator of transcription 5A (Stat5a), mRNA. /PROD=signal transducer and activator of transcription5A /FL=gb:U36502.1 gb:NM_011488.1 gb:U21103.1
1422715_s_at	264.2	P	0.00024	-1.6	-3.03	D	0.99965	0.00035	gb:NM_021330.1 /DB_XREF=gi:10946641 /GEN=Acp1 /FEA=FLmRNA /CNT=167 /TID=Mm.26166.1 /TIER=FL+Stack /STK=16 /UG=Mm.26166 /LL=11431 /DEF=Mus musculus acid phosphatase 1, soluble (Acp1), mRNA. /PROD=acid phosphatase 1, soluble /FL=gb:NM_021330.1
1424345_s_at	511.9	P	0.01416	-1.6	-3.03	D	0.99998	2e-05	gb:BC021792.1 /DB_XREF=gi:18256833 /FEA=FLmRNA /CNT=117 /TID=Mm.196580.1 /TIER=FL+Stack /STK=36 /UG=Mm.196580 /DEF=Mus musculus, ubiquitin-conjugating enzyme E2M (UBC12 homolog, yeast), clone MGC:25453 IMAGE:4235190, mRNA, complete cds. /PROD=ubiquitin-conjugating enzyme E2M (UBC12 homolog,yeast) /FL=gb:BC021792.1
1424354_at	372.2	P	0.00195	-1.6	-3.03	D	0.99998	2e-05	gb:BC020080.1 /DB_XREF=gi:18043290 /FEA=FLmRNA /CNT=68 /TID=Mm.46356.1 /TIER=FL+Stack /STK=36 /UG=Mm.46356 /DEF=Mus musculus, clone MGC:28217 IMAGE:3990521, mRNA, complete cds. /PROD=Unknown (protein for MGC:28217) /FL=gb:BC020080.1
1424937_at	178.9	P	0.00073	-1.6	-3.03	D	0.99992	8e-05	gb:BC024138.1 /DB_XREF=gi:18848248 /FEA=FLmRNA /CNT=26 /TID=Mm.22926.1 /TIER=FL+Stack /STK=11 /UG=Mm.22926 /LL=66968 /UG_GENE=2310076L09Rik /DEF=Mus musculus, RIKEN cDNA 2310076L09 gene, clone MGC:37973 IMAGE:5136320, mRNA, complete cds. /PROD=RIKEN cDNA 2310076L09 gene /FL=gb:BC024138.1
1426243_at	102.5	P	0.01074	-1.6	-3.03	D	0.99923	0.00077	gb:BC019483.1 /DB_XREF=gi:18044097 /FEA=FLmRNA /CNT=66 /TID=Mm.28301.1 /TIER=FL+Stack /STK=28 /UG=Mm.28301 /LL=70338 /UG_GENE=0610010I13Rik /DEF=Mus musculus, clone MGC:28655 IMAGE:4235178, mRNA, complete cds. /PROD=Unknown (protein for MGC:28655) /FL=gb:BC019483.1
1426721_s_at	643.2	P	0.00122	-1.6	-3.03	D	0.99993	7e-05	gb:BB667071 /DB_XREF=gi:16398520 /DB_XREF=BB667071 /CLONE=2310056N24 /FEA=mRNA /CNT=248 /TID=Mm.21712.1 /TIER=Stack /STK=92 /UG=Mm.21712 /UG_TITLE=Mus musculus, clone IMAGE:3485144, mRNA
1427297_at	541.7	P	0.00122	-1.6	-3.03	D	0.99995	5e-05	gb:AW537481 /DB_XREF=gi:7179898 /DB_XREF=G0116H11-3 /CLONE=G0116H11 /FEA=mRNA /CNT=78 /TID=Mm.218515.1 /TIER=Stack /STK=12 /UG=Mm.218515 /LL=78523 /UG_GENE=Mrpl9 /UG_TITLE=mitochondrial ribosomal protein L9
1427946_s_at	72.1	P	0.00586	-1.6	-3.03	D	0.99997	4e-05	gb:BC028831.1 /DB_XREF=gi:20381137 /FEA=mRNA /CNT=29 /TID=Mm.27907.1 /TIER=Stack /STK=14 /UG=Mm.27907 /DEF=Mus musculus, Similar to dihydropyrimidine dehydrogenase, clone MGC:37940 IMAGE:5126155, mRNA, complete cds. /PROD=Similar to dihydropyrimidine dehydrogenase
1431475_a_at	125.7	A	0.08057	-1.6	-3.03	D	0.99979	0.00021	gb:AK002670.1 /DB_XREF=gi:12832825 /FEA=mRNA /CNT=3 /TID=Mm.5.2 /TIER=ConsEnd /STK=2 /UG=Mm.5 /LL=15395 /UG_GENE=Hoxa10 /UG_TITLE=homeo box A10 /DEF=Mus musculus adult male kidney cDNA, RIKEN full-length enriched library, clone:0610025N02:homeo box A10, full insert sequence.
1435259_s_at	228.9	M	0.05615	-1.6	-3.03	D	0.99995	5e-05	gb:AW551717 /DB_XREF=gi:7197056 /DB_XREF=L0201G04-3 /CLONE=L0201G04 /FEA=EST /CNT=30 /TID=Mm.5769.1 /TIER=Stack /STK=18 /UG=Mm.5769 /LL=51875 /UG_GENE=D2Ertd217e /UG_TITLE=DNA segment, Chr 2, ERATO Doi 217, expressed
1435370_a_at	626.9	P	0.00024	-1.6	-3.03	D	0.99995	5e-05	gb:AI315015 /DB_XREF=gi:4030282 /DB_XREF=uj23d06.x1 /CLONE=IMAGE:1920779 /FEA=EST /CNT=21 /TID=Mm.120807.2 /TIER=Stack /STK=17 /UG=Mm.120807 /LL=104158 /UG_GENE=Ces3 /UG_TITLE=carboxylesterase 3
1435524_at	734.9	P	0.01856	-1.6	-3.03	D	0.99998	2e-05	gb:AV030603 /DB_XREF=gi:4830151 /DB_XREF=AV030603 /CLONE=1500015B08 /FEA=EST /CNT=31 /TID=Mm.1948.5 /TIER=Stack /STK=15 /UG=Mm.1948 /LL=21648 /UG_GENE=Tctex1 /UG_TITLE=t-complex testis expressed 1
1449083_at	470	P	0.00024	-1.6	-3.03	D	0.99998	2e-05	gb:NM_025911.1 /DB_XREF=gi:13385403 /GEN=1810060J02Rik /FEA=FLmRNA /CNT=81 /TID=Mm.9864.1 /TIER=FL+Stack /STK=23 /UG=Mm.9864 /LL=67015 /DEF=Mus musculus RIKEN cDNA 1810060J02 gene (1810060J02Rik), mRNA. /PROD=RIKEN cDNA 1810060J02 /FL=gb:NM_025911.1 gb:BC024946.1
1449519_at	139.2	P	0.03027	-1.6	-3.03	D	0.99994	6e-05	gb:NM_007836.1 /DB_XREF=gi:6681148 /GEN=Gadd45a /FEA=FLmRNA /CNT=27 /TID=Mm.1236.1 /TIER=FL+Stack /STK=8 /UG=Mm.1236 /LL=13197 /DEF=Mus musculus growth arrest and DNA-damage-inducible 45 alpha (Gadd45a), mRNA. /PROD=growth arrest and DNA-damage-inducible 45 alpha /FL=gb:NM_007836.1 gb:BC011141.1 gb:L28177.1
1451624_a_at	156.6	P	0.00073	-1.6	-3.03	D	0.99951	0.00049	gb:BC025612.1 /DB_XREF=gi:19343649 /FEA=FLmRNA /CNT=47 /TID=Mm.9621.1 /TIER=FL /STK=4 /UG=Mm.9621 /LL=73373 /UG_GENE=1700048E23Rik /DEF=Mus musculus, RIKEN cDNA 1700048E23 gene, clone MGC:36254 IMAGE:5257820, mRNA, complete cds. /PROD=RIKEN cDNA 1700048E23 gene /FL=gb:BC025612.1
1451969_s_at	870	P	0.00195	-1.6	-3.03	D	0.99998	2e-05	gb:BC014870.1 /DB_XREF=gi:15928822 /FEA=FLmRNA /CNT=103 /TID=Mm.23981.1 /TIER=FL+Stack /STK=64 /UG=Mm.23981 /DEF=Mus musculus, clone MGC:11997 IMAGE:3602116, mRNA, complete cds. /PROD=Unknown (protein for MGC:11997) /FL=gb:BC014870.1
1452200_at	361.8	P	0.00024	-1.6	-3.03	D	0.99995	5e-05	gb:BF100837 /DB_XREF=gi:10883363 /DB_XREF=601753772F1 /CLONE=IMAGE:3981545 /FEA=mRNA /CNT=154 /TID=Mm.20491.1 /TIER=Stack /STK=64 /UG=Mm.20491 /LL=77780 /UG_GENE=A430101B06Rik /UG_TITLE=RIKEN cDNA A430101B06 gene
1455626_at	572.9	P	0.00024	-1.6	-3.03	D	0.99992	8e-05	gb:AA987181 /DB_XREF=gi:3167944 /DB_XREF=uc81c08.x1 /CLONE=IMAGE:1432046 /FEA=EST /CNT=12 /TID=Mm.4694.2 /TIER=Stack /STK=10 /UG=Mm.4694 /LL=15405 /UG_GENE=Hoxa9 /UG_TITLE=homeo box A9
AFFX-ThrX-3_at	137	P	0.01138	-1.7	-3.25	D	0.9994	0.0006	X04603 B subtilis thrC, thrB genes corresponding to nucleotides 248-2229 of X04603 (-5, -M, -3 represent transcript regions 5 prime, Middle, and 3 prime respectively)
1416142_at	195	A	0.14966	-1.7	-3.25	D	0.99981	0.00019	gb:AA103697 /DB_XREF=gi:1649860 /DB_XREF=mo40d06.r1 /CLONE=IMAGE:556043 /FEA=FLmRNA /CNT=288 /TID=Mm.1139.1 /TIER=ConsEnd /STK=0 /UG=Mm.1139 /LL=20104 /UG_GENE=Rps6 /UG_TITLE=ribosomal protein S6 /FL=gb:NM_009096.1 gb:BC010604.1
1416292_at	1258.4	P	0.00415	-1.7	-3.25	D	0.99998	2e-05	gb:NM_007452.1 /DB_XREF=gi:6680689 /GEN=Prdx3 /FEA=FLmRNA /CNT=199 /TID=Mm.29821.1 /TIER=FL+Stack /STK=101 /UG=Mm.29821 /LL=11757 /DEF=Mus musculus peroxiredoxin 3 (Prdx3), mRNA. /PROD=anti-oxidant protein 1 /FL=gb:BC005626.1 gb:M28723.1 gb:NM_007452.1
1418697_at	269.5	P	0.00586	-1.7	-3.25	D	0.99951	0.00049	gb:NM_009349.1 /DB_XREF=gi:6678280 /GEN=Temt /FEA=FLmRNA /CNT=97 /TID=Mm.299.1 /TIER=FL+Stack /STK=19 /UG=Mm.299 /LL=21743 /DEF=Mus musculus thioether S-methyltransferase (Temt), mRNA. /PROD=thioether S-methyltransferase /FL=gb:M88694.1 gb:NM_009349.1 gb:BC013518.1
1418710_at	491.6	P	0.00415	-1.7	-3.25	D	0.99997	3e-05	gb:NM_007652.1 /DB_XREF=gi:6671713 /GEN=Cd59a /FEA=FLmRNA /CNT=90 /TID=Mm.8457.1 /TIER=FL+Stack /STK=19 /UG=Mm.8457 /LL=12509 /DEF=Mus musculus CD59a antigen (Cd59a), mRNA. /PROD=CD59a antigen /FL=gb:U60473.1 gb:NM_007652.1
1419197_x_at	129.7	A	0.06763	-1.7	-3.25	D	0.99914	0.00087	gb:NM_032541.1 /DB_XREF=gi:14211541 /GEN=Hamp /FEA=FLmRNA /CNT=18 /TID=Mm.23995.1 /TIER=FL+Stack /STK=12 /UG=Mm.23995 /LL=84506 /DEF=Mus musculus hepcidin antimicrobial peptide (Hamp), mRNA. /PROD=hepcidin antimicrobial peptide /FL=gb:NM_032541.1 gb:AF297664.1 gb:BC021587.1
1424244_at	273.5	P	0.00122	-1.7	-3.25	D	0.99951	0.00049	gb:AK005797.1 /DB_XREF=gi:12838556 /GEN=Icam1 /FEA=FLmRNA /CNT=132 /TID=Mm.25455.1 /TIER=Stack /STK=8 /UG=Mm.25455 /UG_TITLE=Mus musculus adult male testis cDNA, RIKEN full-length enriched library, clone:1700009J18:intercellular adhesion molecule, full insert sequence /DEF=Mus musculus adult male testis cDNA, RIKEN full-length enriched library, clone:1700009J18:intercellular adhesion molecule, fu…
1424510_at	161	P	0.00024	-1.7	-3.25	D	0.99987	0.00013	gb:BC027267.1 /DB_XREF=gi:20072675 /FEA=FLmRNA /CNT=32 /TID=Mm.30820.1 /TIER=FL+Stack /STK=28 /UG=Mm.30820 /DEF=Mus musculus, clone MGC:27904 IMAGE:3500531, mRNA, complete cds. /PROD=Unknown (protein for MGC:27904) /FL=gb:BC027267.1
1425521_at	103.4	P	0.00806	-1.7	-3.25	D	0.99983	0.00017	gb:BC019726.1 /DB_XREF=gi:18044019 /FEA=FLmRNA /CNT=63 /TID=Mm.25450.1 /TIER=FL /STK=1 /UG=Mm.25450 /DEF=Mus musculus, Similar to polyadenylate binding protein-interacting protein 1, clone MGC:30858 IMAGE:4010170, mRNA, complete cds. /PROD=Similar to polyadenylate bindingprotein-interacting protein 1 /FL=gb:BC019726.1
1430700_a_at	77.1	A	0.27417	-1.7	-3.25	D	0.99969	0.00031	gb:AK005158.1 /DB_XREF=gi:12836890 /GEN=Pla2g7 /FEA=mRNA /CNT=6 /TID=Mm.9277.2 /TIER=ConsEnd /STK=1 /UG=Mm.9277 /LL=27226 /UG_TITLE=phospholipase A2 group VII (platelet-activating factor acetylhydrolase, plasma) /DEF=Mus musculus adult male cerebellum cDNA, RIKEN full-length enriched library, clone:1500005E13:phospholipase A2 group VII (platelet-activating factor acetylhydrolase, plasma), full in…
1431328_at	205.4	P	0.00195	-1.7	-3.25	D	0.99998	2e-05	gb:AK017392.1 /DB_XREF=gi:12856610 /FEA=mRNA /CNT=5 /TID=Mm.4572.2 /TIER=ConsEnd /STK=0 /UG=Mm.4572 /LL=19046 /UG_GENE=Ppp1cb /UG_TITLE=protein phosphatase 1, catalytic subunit, beta isoform /DEF=Mus musculus 6 days neonate head cDNA, RIKEN full-length enriched library, clone:5430434K07:protein phosphatase 1, catalytic subunit, beta isoform, full insert sequence.
1434341_x_at	368.1	P	0.00024	-1.7	-3.25	D	0.99997	3e-05	gb:BF681728 /DB_XREF=gi:11955623 /DB_XREF=602117220F2 /CLONE=IMAGE:3468340 /FEA=EST /CNT=44 /TID=Mm.22138.2 /TIER=Stack /STK=34 /UG=Mm.22138 /UG_TITLE=Mus musculus, Similar to ubiquinol-cytochrome c reductase complex (7.2 kD), clone MGC:37480 IMAGE:4984172, mRNA, complete cds
1435097_at	135.7	P	0.04614	-1.7	-3.25	D	0.99985	0.00015	gb:BB772682 /DB_XREF=gi:16214373 /DB_XREF=BB772682 /CLONE=G370147A05 /FEA=EST /CNT=30 /TID=Mm.69.3 /TIER=Stack /STK=20 /UG=Mm.69 /LL=18221 /UG_GENE=Nudc /UG_TITLE=nuclear distribution gene C homolog (Aspergillus)
1449106_at	1467.8	P	0.02393	-1.7	-3.25	D	0.99965	0.00035	gb:NM_008161.1 /DB_XREF=gi:6680076 /GEN=Gpx3 /FEA=FLmRNA /CNT=307 /TID=Mm.7156.1 /TIER=FL+Stack /STK=22 /UG=Mm.7156 /LL=14778 /DEF=Mus musculus glutathione peroxidase 3 (Gpx3), mRNA. /PROD=glutathione peroxidase 3 /FL=gb:U13705.1 gb:NM_008161.1
1450387_s_at	221	P	0.00122	-1.7	-3.25	D	0.99998	2e-05	gb:NM_009647.1 /DB_XREF=gi:6753021 /GEN=Ak4 /FEA=FLmRNA /CNT=131 /TID=Mm.42040.1 /TIER=FL+Stack /STK=70 /UG=Mm.42040 /LL=11639 /DEF=Mus musculus adenylate kinase 4 (Ak4), mRNA. /PROD=adenylate kinase 4 /FL=gb:D85036.1 gb:NM_009647.1 gb:AB020239.1
1460687_at	855	P	0.00073	-1.7	-3.25	D	0.99979	0.00021	gb:BB787289 /DB_XREF=gi:16955785 /DB_XREF=BB787289 /CLONE=G430115P18 /FEA=FLmRNA /CNT=204 /TID=Mm.27424.1 /TIER=Stack /STK=10 /UG=Mm.27424 /LL=67956 /UG_GENE=2410195B05Rik /UG_TITLE=RIKEN cDNA 2410195B05 gene /FL=gb:BC003444.1
AFFX-PyruCarbMur/L09192_3_at	438.1	P	0.00321	-1.8	-3.48	D	1	0	M. musculus /GEN=pyruvate carboxylase /DB_XREF=gb:L09192.1 /NOTE=SIF corresponding to nucleotides 3369-3999 of gb:L09192.1 /DEF=Mus musculus pyruvate carboxylase mRNA, complete cds.
1416225_at	434.5	P	0.00024	-1.8	-3.48	D	0.99985	0.00015	gb:BC013477.1 /DB_XREF=gi:15488661 /FEA=FLmRNA /CNT=321 /TID=Mm.2409.1 /TIER=FL+Stack /STK=110 /UG=Mm.2409 /LL=11522 /UG_GENE=Adh1 /DEF=Mus musculus, alcohol dehydrogenase 1, complex, clone MGC:18885 IMAGE:4238555, mRNA, complete cds. /PROD=alcohol dehydrogenase 1, complex /FL=gb:NM_007409.1 gb:BC013477.1
1416383_a_at	513.1	P	0.02393	-1.8	-3.48	D	0.99981	0.00019	gb:NM_008797.1 /DB_XREF=gi:6679236 /GEN=Pcx /FEA=FLmRNA /CNT=164 /TID=Mm.1845.1 /TIER=FL+Stack /STK=93 /UG=Mm.1845 /LL=18563 /DEF=Mus musculus pyruvate decarboxylase (Pcx), mRNA. /PROD=pyruvate decarboxylase /FL=gb:L09192.1 gb:NM_008797.1
1416687_at	55.7	A	0.12964	-1.8	-3.48	D	0.99945	0.00055	gb:BC021352.1 /DB_XREF=gi:18204026 /FEA=FLmRNA /CNT=143 /TID=Mm.79983.1 /TIER=FL+Stack /STK=25 /UG=Mm.79983 /LL=26432 /UG_GENE=Plod2 /DEF=Mus musculus, procollagen lysine, 2-oxoglutarate 5-dioxygenase 2, clone MGC:29312 IMAGE:5007509, mRNA, complete cds. /PROD=procollagen lysine, 2-oxoglutarate 5-dioxygenase2 /FL=gb:AF080572.1 gb:BC021352.1 gb:NM_011961.1
1417836_at	87.2	P	0.03027	-1.8	-3.48	D	0.99979	0.00021	gb:NM_024198.1 /DB_XREF=gi:13195625 /GEN=3110050F08Rik /FEA=FLmRNA /CNT=60 /TID=Mm.20164.1 /TIER=FL+Stack /STK=35 /UG=Mm.20164 /LL=67305 /DEF=Mus musculus RIKEN cDNA 3110050F08 gene (3110050F08Rik), mRNA. /PROD=RIKEN cDNA 3110050F08 /FL=gb:BC003228.1 gb:NM_024198.1
1418507_s_at	297	P	0.00293	-1.8	-3.48	D	0.99989	0.00011	gb:BB244736 /DB_XREF=gi:16355335 /DB_XREF=BB244736 /CLONE=A730004E21 /FEA=FLmRNA /CNT=154 /TID=Mm.4132.1 /TIER=Stack /STK=26 /UG=Mm.4132 /LL=12701 /UG_GENE=Cish2 /UG_TITLE=cytokine inducible SH2-containing protein 2 /FL=gb:NM_007706.1 gb:U88327.1
1423060_at	129.4	P	0.01416	-1.8	-3.48	D	0.99969	0.00031	gb:AW536189 /DB_XREF=gi:7178606 /DB_XREF=G0101E08-3 /CLONE=G0101E08 /FEA=FLmRNA /CNT=308 /TID=Mm.4742.1 /TIER=Stack /STK=74 /UG=Mm.4742 /LL=18813 /UG_GENE=Pa2g4 /UG_TITLE=proliferation-associated 2G4, 38kD /FL=gb:NM_011119.1 gb:U43918.1
1423357_at	134.7	A	0.12964	-1.8	-3.48	D	0.99995	5e-05	gb:AK013127.1 /DB_XREF=gi:12850295 /FEA=FLmRNA /CNT=37 /TID=Mm.46777.1 /TIER=Stack /STK=12 /UG=Mm.46777 /LL=67164 /UG_GENE=2610209A20Rik /UG_TITLE=RIKEN cDNA 2610209A20 gene /DEF=Mus musculus 10, 11 days embryo whole body cDNA, RIKEN full-length enriched library, clone:2810421N01:related to LIPOYLTRANSFERASE, full insert sequence. /FL=gb:NM_026010.1
1424268_at	622.3	P	0.00293	-1.8	-3.48	D	0.99983	0.00017	gb:BC004831.1 /DB_XREF=gi:13435998 /FEA=FLmRNA /CNT=73 /TID=Mm.29763.1 /TIER=FL+Stack /STK=42 /UG=Mm.29763 /DEF=Mus musculus, Similar to hypothetical protein, clone MGC:6794 IMAGE:2647695, mRNA, complete cds. /PROD=Similar to hypothetical protein /FL=gb:BC004831.1
1425546_a_at	190.8	A	0.11157	-1.8	-3.48	D	0.99938	0.00062	gb:AF440692.1 /DB_XREF=gi:17046470 /FEA=FLmRNA /CNT=23 /TID=Mm.37214.2 /TIER=FL /STK=1 /UG=Mm.37214 /LL=22041 /UG_GENE=Trf /DEF=Mus musculus transferrin mRNA, complete cds. /PROD=transferrin /FL=gb:AF440692.1
1427447_a_at	469.1	P	0.00122	-1.8	-3.48	D	0.99998	2e-05	gb:BC003984.1 /DB_XREF=gi:13278324 /FEA=mRNA /CNT=43 /TID=Mm.27268.1 /TIER=ConsEnd /STK=0 /UG=Mm.27268 /DEF=Mus musculus, clone IMAGE:3491252, mRNA, partial cds. /PROD=Unknown (protein for IMAGE:3491252)
1428317_at	118	P	0.00122	-1.8	-3.48	D	0.99965	0.00035	gb:AV291003 /DB_XREF=gi:16392351 /DB_XREF=AV291003 /CLONE=5330401L05 /FEA=mRNA /CNT=115 /TID=Mm.24543.2 /TIER=ConsEnd /STK=3 /UG=Mm.24543 /LL=67391 /UG_GENE=4833415N24Rik /UG_TITLE=RIKEN cDNA 4833415N24 gene
1434137_x_at	53.2	A	0.33447	-1.8	-3.48	D	0.99931	0.00069	gb:BI792151 /DB_XREF=gi:15819876 /DB_XREF=ib99b12.x1 /CLONE=IMAGE:5654735 /FEA=EST /CNT=46 /TID=Mm.21835.2 /TIER=Stack /STK=41 /UG=Mm.21835 /LL=69036 /UG_GENE=1810010M01Rik /UG_TITLE=RIKEN cDNA 1810010M01 gene
1434306_at	204.3	P	0.00024	-1.8	-3.48	D	0.99951	0.00049	gb:BF319015 /DB_XREF=gi:11267708 /DB_XREF=uy07f09.x1 /CLONE=IMAGE:3657353 /FEA=EST /CNT=77 /TID=Mm.27668.1 /TIER=Stack /STK=35 /UG=Mm.27668 /UG_TITLE=ESTs, Moderately similar to I57546 Rabin3 - rat (R.norvegicus)
1434914_at	70.2	P	0.0376	-1.8	-3.48	D	0.99945	0.00055	gb:BB396668 /DB_XREF=gi:16411037 /DB_XREF=BB396668 /CLONE=C230098J04 /FEA=EST /CNT=26 /TID=Mm.29807.2 /TIER=Stack /STK=23 /UG=Mm.29807 /LL=22223 /UG_GENE=Uchl1 /UG_TITLE=ubiquitin carboxy-terminal hydrolase L1
1436506_a_at	380.3	P	0.00073	-1.8	-3.48	D	0.99998	2e-05	gb:AW988981 /DB_XREF=gi:8184262 /DB_XREF=uf22c01.y1 /CLONE=IMAGE:1512096 /FEA=EST /CNT=35 /TID=Mm.28311.1 /TIER=Stack /STK=8 /UG=Mm.28311 /UG_TITLE=ESTs
1438251_x_at	408.5	P	0.01074	-1.8	-3.48	D	0.99998	2e-05	gb:BB559067 /DB_XREF=gi:9645433 /DB_XREF=BB559067 /CLONE=E330037D02 /FEA=EST /CNT=15 /TID=Mm.30156.2 /TIER=Stack /STK=11 /UG=Mm.30156 /LL=56213 /UG_GENE=Prss11 /UG_TITLE=protease, serine, 11 (Igf binding)
1439380_x_at	1297.7	P	0.00806	-1.8	-3.48	D	0.99998	2e-05	gb:BB093563 /DB_XREF=gi:8676810 /DB_XREF=BB093563 /CLONE=9430042P15 /FEA=EST /CNT=8 /TID=Mm.154560.3 /TIER=Stack /STK=8 /UG=Mm.154560 /LL=17263 /UG_GENE=Meg3 /UG_TITLE=maternally expressed gene 3
1449081_at	549.2	P	0.00073	-1.8	-3.48	D	0.99938	0.00062	gb:NM_053200.1 /DB_XREF=gi:16716504 /GEN=Ces3 /FEA=FLmRNA /CNT=81 /TID=Mm.120807.1 /TIER=FL+Stack /STK=23 /UG=Mm.120807 /LL=104158 /DEF=Mus musculus carboxylesterase 3 (Ces3), mRNA. /PROD=carboxylesterase 3 /FL=gb:NM_053200.1 gb:BC019198.1 gb:AF378751.1 gb:AB023631.1
1456747_x_at	150	P	0.02393	-1.8	-3.48	D	0.99981	0.00019	gb:BB334959 /DB_XREF=gi:9043722 /DB_XREF=BB334959 /CLONE=B830029F17 /FEA=EST /CNT=8 /TID=Mm.20838.2 /TIER=Stack /STK=8 /UG=Mm.20838 /LL=171486 /UG_GENE=Mic2l1 /UG_TITLE=MIC2 (monoclonal Imperial Cancer Research Fund 2)-like 1
1416316_at	63.1	A	0.09522	-1.9	-3.73	D	0.99995	5e-05	gb:BC013442.1 /DB_XREF=gi:15488596 /FEA=FLmRNA /CNT=235 /TID=Mm.6611.1 /TIER=FL+Stack /STK=99 /UG=Mm.6611 /LL=26458 /UG_GENE=Slc27a2 /DEF=Mus musculus, solute carrier family 27 (fatty acid transporter), member 2, clone MGC:18372 IMAGE:4236616, mRNA, complete cds. /PROD=solute carrier family 27 (fatty acidtransporter), member 2 /FL=gb:AF033031.1 gb:BC022170.1 gb:BC024735.1 gb:AF072757.1 gb:BC01344…
1416424_at	194.7	A	0.11157	-1.9	-3.73	D	0.99903	0.00097	gb:BC011116.1 /DB_XREF=gi:15029789 /FEA=FLmRNA /CNT=246 /TID=Mm.104975.1 /TIER=FL+Stack /STK=90 /UG=Mm.104975 /LL=66905 /UG_GENE=1300012C15Rik /DEF=Mus musculus, RIKEN cDNA 1300012C15 gene, clone MGC:19018 IMAGE:4023354, mRNA, complete cds. /PROD=RIKEN cDNA 1300012C15 gene /FL=gb:NM_025836.1 gb:BC011116.1
1416749_at	357.7	P	0.01416	-1.9	-3.73	D	0.99983	0.00017	gb:NM_019564.1 /DB_XREF=gi:9625026 /GEN=Prss11 /FEA=FLmRNA /CNT=144 /TID=Mm.30156.1 /TIER=FL+Stack /STK=71 /UG=Mm.30156 /LL=56213 /DEF=Mus musculus protease, serine, 11 (Igf binding) (Prss11), mRNA. /PROD=protease, serine, 11 (Igf binding) /FL=gb:BC013516.1 gb:NM_019564.1 gb:AF172994.1 gb:AF179369.1
1425019_at	501.4	P	0.03027	-1.9	-3.73	D	0.99998	2e-05	gb:BC004632.1 /DB_XREF=gi:13435513 /FEA=FLmRNA /CNT=119 /TID=Mm.40697.1 /TIER=FL+Stack /STK=8 /UG=Mm.40697 /DEF=Mus musculus, clone MGC:7992 IMAGE:3585699, mRNA, complete cds. /PROD=Unknown (protein for MGC:7992) /FL=gb:BC004632.1
1426406_at	463	P	0.00024	-1.9	-3.73	D	0.99923	0.00077	gb:BG069700 /DB_XREF=gi:12552269 /DB_XREF=H3079B09-3 /CLONE=H3079B09 /FEA=FLmRNA /CNT=204 /TID=Mm.27424.1 /TIER=Stack /STK=28 /UG=Mm.27424 /LL=67956 /UG_GENE=2410195B05Rik /UG_TITLE=RIKEN cDNA 2410195B05 gene /FL=gb:BC003444.1
1426758_s_at	281.2	A	0.11157	-1.9	-3.73	D	0.99965	0.00035	gb:Y13832.1 /DB_XREF=gi:2739299 /FEA=mRNA /CNT=128 /TID=Mm.154560.1 /TIER=Stack /STK=74 /UG=Mm.154560 /LL=17263 /UG_GENE=Meg3 /UG_TITLE=maternally expressed gene 3 /DEF=Mus musculus mRNA for GT12 protein.
1449615_s_at	42.9	A	0.14966	-1.9	-3.73	D	0.99985	0.00015	gb:C77256 /DB_XREF=gi:2517586 /DB_XREF=C77256 /CLONE=J0028B03 /FEA=EST /CNT=1 /TID=Mm.215181.1 /TIER=ConsEnd /STK=1 /UG=Mm.215181 /LL=52229 /UG_GENE=D1Ertd101e /UG_TITLE=DNA segment, Chr 1, ERATO Doi 101, expressed
1456746_a_at	315.7	P	0.00024	-1.9	-3.73	D	0.99991	9e-05	gb:BB334959 /DB_XREF=gi:9043722 /DB_XREF=BB334959 /CLONE=B830029F17 /FEA=EST /CNT=8 /TID=Mm.20838.2 /TIER=Stack /STK=8 /UG=Mm.20838 /LL=171486 /UG_GENE=Mic2l1 /UG_TITLE=MIC2 (monoclonal Imperial Cancer Research Fund 2)-like 1
1416649_at	52.1	M	0.05615	-2	-4	D	0.99938	0.00062	gb:NM_007443.1 /DB_XREF=gi:6680683 /GEN=Ambp /FEA=FLmRNA /CNT=156 /TID=Mm.2197.1 /TIER=FL+Stack /STK=76 /UG=Mm.2197 /LL=11699 /DEF=Mus musculus alpha 1 microglobulinbikunin (Ambp), mRNA. /PROD=alpha 1 microglobulinbikunin /FL=gb:BC021660.1 gb:NM_007443.1
1418787_at	87.8	P	0.03027	-2	-4	D	0.99961	0.00039	gb:NM_010776.1 /DB_XREF=gi:6754655 /GEN=Mbl2 /FEA=FLmRNA /CNT=39 /TID=Mm.30045.1 /TIER=FL+Stack /STK=18 /UG=Mm.30045 /LL=17195 /DEF=Mus musculus mannose binding lectin, serum (C) (Mbl2), mRNA. /PROD=mannose binding lectin, serum (C) /FL=gb:NM_010776.1 gb:D11440.1 gb:BC010760.1
1419437_at	74	P	0.00073	-2	-4	D	0.99951	0.00049	gb:NM_011377.1 /DB_XREF=gi:7106404 /GEN=Sim2 /FEA=FLmRNA /CNT=13 /TID=Mm.4775.1 /TIER=FL+Stack /STK=10 /UG=Mm.4775 /LL=20465 /DEF=Mus musculus single-minded 2 (Sim2), mRNA. /PROD=single-minded 2 /FL=gb:D64135.1 gb:NM_011377.1 gb:U40576.1 gb:U42554.1 gb:D63383.1
1426260_a_at	59.3	P	0.00806	-2	-4	D	0.99998	2e-05	gb:D87867.1 /DB_XREF=gi:1660991 /GEN=UGP1a1 /FEA=FLmRNA /CNT=20 /TID=Mm.42472.3 /TIER=FL+Stack /STK=19 /UG=Mm.42472 /LL=22236 /DEF=Mus musculus mRNA for phenol UDP-glucuronosyltransferase, complete cds. /PROD=phenol UDP-glucuronosyltransferase /FL=gb:D87867.1
1448107_x_at	37	A	0.21948	-2	-4	D	0.99965	0.00035	gb:BC010754.1 /DB_XREF=gi:14789645 /FEA=FLmRNA /CNT=368 /TID=Mm.4486.1 /TIER=FL+Stack /STK=220 /UG=Mm.4486 /LL=16612 /UG_GENE=Klk6 /DEF=Mus musculus, clone MGC:18433 IMAGE:4240906, mRNA, complete cds. /PROD=Unknown (protein for MGC:18433) /FL=gb:D10464.1 gb:BC010754.1 gb:NM_010639.3
1449376_at	56.3	P	0.00586	-2	-4	D	0.99998	2e-05	gb:NM_025449.1 /DB_XREF=gi:13384851 /GEN=Nicn1 /FEA=FLmRNA /CNT=76 /TID=Mm.10407.1 /TIER=FL+Stack /STK=12 /UG=Mm.10407 /LL=66257 /DEF=Mus musculus nicolin 1 (Nicn1), mRNA. /PROD=nicolin 1 /FL=gb:NM_025449.1
1415994_at	388.7	P	0.00073	-2.1	-4.29	D	0.99991	9e-05	gb:NM_021282.1 /DB_XREF=gi:11276064 /GEN=Cyp2e1 /FEA=FLmRNA /CNT=381 /TID=Mm.21758.1 /TIER=FL+Stack /STK=151 /UG=Mm.21758 /LL=13106 /DEF=Mus musculus cytochrome P450, 2e1, ethanol inducible (Cyp2e1), mRNA. /PROD=cytochrome P450, 2e1, ethanol inducible /FL=gb:NM_021282.1 gb:L11650.1 gb:BC013451.1
1417950_a_at	152.9	P	0.0376	-2.1	-4.29	D	0.99983	0.00017	gb:NM_013474.1 /DB_XREF=gi:7304896 /GEN=Apoa2 /FEA=FLmRNA /CNT=78 /TID=Mm.43677.1 /TIER=FL+Stack /STK=32 /UG=Mm.43677 /LL=11807 /DEF=Mus musculus apolipoprotein A-II (Apoa2), mRNA. /PROD=apolipoprotein A-II /FL=gb:NM_013474.1 gb:M79362.1 gb:M79361.1
1425260_at	953.4	P	0.00024	-2.1	-4.29	D	0.99998	2e-05	gb:BC024643.1 /DB_XREF=gi:19353305 /FEA=FLmRNA /CNT=244 /TID=Mm.16773.1 /TIER=FL /STK=3 /UG=Mm.16773 /LL=11657 /UG_GENE=Alb1 /DEF=Mus musculus, Similar to albumin, clone MGC:27522 IMAGE:4242076, mRNA, complete cds. /PROD=Similar to albumin /FL=gb:BC024643.1
1426225_at	151.5	P	0.00024	-2.1	-4.29	D	0.99998	2e-05	gb:U63146.1 /DB_XREF=gi:1515449 /GEN=RBP /FEA=FLmRNA /CNT=137 /TID=Mm.2605.1 /TIER=FL+Stack /STK=45 /UG=Mm.2605 /LL=19662 /DEF=Mus musculus retinol binding protein (RBP) mRNA, complete cds. /PROD=retinol binding protein /FL=gb:U63146.1
1430375_a_at	89.2	A	0.30371	-2.1	-4.29	D	0.99995	5e-05	gb:BE198116 /DB_XREF=gi:8710285 /DB_XREF=ug79g12.x1 /CLONE=IMAGE:1548646 /FEA=mRNA /CNT=5 /TID=Mm.6660.2 /TIER=ConsEnd /STK=2 /UG=Mm.6660 /LL=20301 /UG_GENE=Scya27 /UG_TITLE=small inducible cytokine A27
1452426_x_at	23.5	A	0.33447	-2.1	-4.29	D	0.99965	0.00035	gb:BC004065.1 /DB_XREF=gi:13278542 /FEA=mRNA /CNT=80 /TID=Mm.220934.1 /TIER=ConsEnd /STK=0 /UG=Mm.220934 /DEF=Mus musculus, clone IMAGE:3590633, mRNA, partial cds. /PROD=Unknown (protein for IMAGE:3590633)
1455930_at	560.5	P	0.02393	-2.1	-4.29	D	0.99973	0.00027	gb:BI651113 /DB_XREF=gi:15565349 /DB_XREF=603297583F1 /CLONE=IMAGE:5338004 /FEA=EST /CNT=105 /TID=Mm.28870.2 /TIER=Stack /STK=24 /UG=Mm.28870 /UG_TITLE=Mus musculus, clone MGC:6827 IMAGE:2649084, mRNA, complete cds
1449123_at	30.3	A	0.21948	-2.2	-4.59	D	0.99969	0.00031	gb:NM_008407.1 /DB_XREF=gi:6680495 /GEN=Itih3 /FEA=FLmRNA /CNT=68 /TID=Mm.4517.1 /TIER=FL+Stack /STK=22 /UG=Mm.4517 /LL=16426 /DEF=Mus musculus inter-alpha trypsin inhibitor, heavy chain 3 (Itih3), mRNA. /PROD=inter-alpha trypsin inhibitor, heavy chain 3 /FL=gb:NM_008407.1 gb:BC015276.1
1452183_a_at	702.1	P	0.0376	-2.2	-4.59	D	0.99998	2e-05	gb:Y13832.1 /DB_XREF=gi:2739299 /FEA=mRNA /CNT=128 /TID=Mm.154560.1 /TIER=Stack /STK=74 /UG=Mm.154560 /LL=17263 /UG_GENE=Meg3 /UG_TITLE=maternally expressed gene 3 /DEF=Mus musculus mRNA for GT12 protein.
1415988_at	59.3	A	0.5	-2.3	-4.92	D	0.9999	0.0001	gb:BG065877 /DB_XREF=gi:12548440 /DB_XREF=H3036C12-3 /CLONE=H3036C12 /FEA=FLmRNA /CNT=498 /TID=Mm.30012.1 /TIER=Stack /STK=28 /UG=Mm.30012 /LL=98244 /UG_GENE=AA960365 /UG_TITLE=expressed sequence AA960365 /FL=gb:BC021765.1 gb:NM_133808.1 gb:BC025648.1
1416729_at	94.8	A	0.12964	-2.3	-4.92	D	0.9999	0.0001	gb:NM_008877.1 /DB_XREF=gi:6679380 /GEN=Plg /FEA=FLmRNA /CNT=196 /TID=Mm.971.1 /TIER=FL+Stack /STK=71 /UG=Mm.971 /LL=18815 /DEF=Mus musculus plasminogen (Plg), mRNA. /PROD=plasminogen /FL=gb:J04766.1 gb:NM_008877.1 gb:BC014773.1
1417522_at	452.5	P	0.00073	-2.3	-4.92	D	0.99998	2e-05	gb:NM_026346.1 /DB_XREF=gi:13385847 /GEN=Fbxo32 /FEA=FLmRNA /CNT=90 /TID=Mm.40466.1 /TIER=FL+Stack /STK=43 /UG=Mm.40466 /LL=67731 /DEF=Mus musculus f-box only protein 32 (Fbxo32), mRNA. /PROD=f-box only protein 32 /FL=gb:AF441120.1 gb:NM_026346.1 gb:BC027211.1
1418871_a_at	8	A	0.33447	-2.3	-4.92	D	0.99914	0.00087	gb:NM_025308.1 /DB_XREF=gi:13384667 /GEN=AA238765 /FEA=FLmRNA /CNT=21 /TID=Mm.36777.1 /TIER=FL+Stack /STK=17 /UG=Mm.36777 /LL=53906 /DEF=Mus musculus EST AA238765 (AA238765), mRNA. /PROD=EST AA238765 /FL=gb:NM_025308.1
1422070_at	21.5	A	0.69629	-2.3	-4.92	D	0.99903	0.00097	gb:NM_011996.1 /DB_XREF=gi:6752985 /GEN=Adh4 /FEA=FLmRNA /CNT=8 /TID=Mm.25845.1 /TIER=FL /STK=1 /UG=Mm.25845 /LL=26876 /DEF=Mus musculus alcohol dehydrogenase 4 (class II), pi polypeptide (Adh4), mRNA. /PROD=alcohol dehydrogenase 4 (class II), pipolypeptide /FL=gb:NM_011996.1
1422751_at	58.6	P	0.0376	-2.3	-4.92	D	0.99951	0.00049	gb:NM_011599.1 /DB_XREF=gi:6755802 /GEN=Tle1 /FEA=FLmRNA /CNT=165 /TID=Mm.12823.1 /TIER=FL+Stack /STK=14 /UG=Mm.12823 /LL=21885 /DEF=Mus musculus transducin-like enhancer of split 1, homolog of Drosophila E(spl) (Tle1), mRNA. /PROD=transducin-like enhancer of split 1, homolog ofDrosophila E(spl) /FL=gb:U61362.1 gb:NM_011599.1
1424279_at	179.8	P	0.01074	-2.3	-4.92	D	0.99951	0.00049	gb:BC005467.1 /DB_XREF=gi:13529484 /FEA=FLmRNA /CNT=168 /TID=Mm.88793.1 /TIER=FL+Stack /STK=40 /UG=Mm.88793 /LL=14161 /UG_GENE=Fga /DEF=Mus musculus, fibrinogen A alpha polypeptide, clone MGC:6605 IMAGE:3487861, mRNA, complete cds. /PROD=fibrinogen A alpha polypeptide /FL=gb:BC005467.1
1448747_at	1170.8	P	0.00024	-2.3	-4.92	D	0.99998	2e-05	gb:AF441120.1 /DB_XREF=gi:17940317 /GEN=Atrogin1 /FEA=FLmRNA /CNT=90 /TID=Mm.40466.1 /TIER=FL+Stack /STK=14 /UG=Mm.40466 /LL=67731 /DEF=Mus musculus ATROGIN1 (Atrogin1) mRNA, complete cds. /PROD=ATROGIN1 /FL=gb:AF441120.1 gb:NM_026346.1 gb:BC027211.1
1452160_at	290.9	P	0.00293	-2.3	-4.92	D	0.99998	2e-05	gb:BB762264 /DB_XREF=gi:16207488 /DB_XREF=BB762264 /CLONE=G370006O12 /FEA=mRNA /CNT=248 /TID=Mm.21712.1 /TIER=Stack /STK=55 /UG=Mm.21712 /UG_TITLE=Mus musculus, clone IMAGE:3485144, mRNA
1455905_at	295.2	P	0.00024	-2.3	-4.92	D	0.99998	2e-05	gb:BI437883 /DB_XREF=gi:15262573 /DB_XREF=ic81a08.x1 /CLONE=IMAGE:5660054 /FEA=EST /CNT=42 /TID=Mm.35854.3 /TIER=Stack /STK=27 /UG=Mm.35854 /LL=72503 /UG_GENE=2610507B11Rik /UG_TITLE=RIKEN cDNA 2610507B11 gene
1424853_s_at	50.6	P	0.03027	-2.4	-5.28	D	0.99997	3e-05	gb:BC010747.1 /DB_XREF=gi:14789623 /FEA=FLmRNA /CNT=51 /TID=Mm.10742.1 /TIER=FL+Stack /STK=13 /UG=Mm.10742 /LL=13117 /UG_GENE=Cyp4a10 /DEF=Mus musculus, clone MGC:18335 IMAGE:4242518, mRNA, complete cds. /PROD=Unknown (protein for MGC:18335) /FL=gb:BC010747.1 gb:AB018421.1 gb:AB017785.1
1428306_at	277.9	P	0.00806	-2.4	-5.28	D	0.99995	5e-05	gb:AK017926.1 /DB_XREF=gi:12857423 /FEA=mRNA /CNT=124 /TID=Mm.21697.1 /TIER=Stack /STK=56 /UG=Mm.21697 /LL=74747 /UG_GENE=5830413E08Rik /UG_TITLE=RIKEN cDNA 5830413E08 gene /DEF=Mus musculus adult male thymus cDNA, RIKEN full-length enriched library, clone:5830413E08:homolog to HYPOTHETICAL 25.4 KDA PROTEIN, full insert sequence.
1448680_at	338.1	P	0.02393	-2.4	-5.28	D	0.99995	5e-05	gb:NM_009245.1 /DB_XREF=gi:6678082 /GEN=Spi1-3 /FEA=FLmRNA /CNT=66 /TID=Mm.196591.1 /TIER=FL+Stack /STK=48 /UG=Mm.196591 /LL=20702 /DEF=Mus musculus serine protease inhibitor 1-3 (Spi1-3), mRNA. /PROD=serine protease inhibitor 1-3 /FL=gb:M75720.1 gb:NM_009245.1
1452257_at	108.4	M	0.05615	-2.4	-5.28	D	0.99985	0.00015	gb:BF322712 /DB_XREF=gi:11272161 /DB_XREF=maa32c03.x1 /CLONE=IMAGE:3812717 /FEA=mRNA /CNT=109 /TID=Mm.29884.1 /TIER=Stack /STK=13 /UG=Mm.29884 /LL=71911 /UG_GENE=2310032J20Rik /UG_TITLE=RIKEN cDNA 2310032J20 gene
1431808_a_at	41.9	A	0.46606	-2.5	-5.66	D	0.99985	0.00015	gb:AK004893.1 /DB_XREF=gi:12836421 /GEN=Rps2 /FEA=mRNA /CNT=1 /TID=Mm.34819.2 /TIER=ConsEnd /STK=0 /UG=Mm.34819 /LL=16427 /UG_TITLE=inter alpha-trypsin inhibitor, heavy chain 4 /DEF=Mus musculus adult male liver cDNA, RIKEN full-length enriched library, clone:1300004A21:ribosomal protein S2, full insert sequence.
1448764_a_at	324.6	P	0.00024	-2.5	-5.66	D	0.99998	2e-05	gb:NM_017399.1 /DB_XREF=gi:8393342 /GEN=Fabp1 /FEA=FLmRNA /CNT=105 /TID=Mm.22126.1 /TIER=FL+Stack /STK=41 /UG=Mm.22126 /LL=14080 /DEF=Mus musculus fatty acid binding protein 1, liver (Fabp1), mRNA. /PROD=fatty acid binding protein 1, liver /FL=gb:BC009812.1 gb:NM_017399.1
1415927_at	2969.1	P	0.00806	-2.6	-6.06	D	0.99998	2e-05	gb:NM_009608.1 /DB_XREF=gi:14192921 /GEN=Actc1 /FEA=FLmRNA /CNT=375 /TID=Mm.686.1 /TIER=FL+Stack /STK=166 /UG=Mm.686 /LL=11464 /DEF=Mus musculus actin, alpha, cardiac (Actc1), mRNA. /PROD=actin, alpha, cardiac /FL=gb:NM_009608.1
1419542_at	14.3	A	0.46606	-2.6	-6.06	D	0.99945	0.00055	gb:AK014854.1 /DB_XREF=gi:12852938 /GEN=Dazl /FEA=FLmRNA /CNT=268 /TID=Mm.15050.1 /TIER=Stack /STK=243 /UG=Mm.15050 /LL=13164 /UG_TITLE=deleted in azoospermia-like /DEF=Mus musculus adult male testis cDNA, RIKEN full-length enriched library, clone:4921509L19:deleted in azoospermia-like, full insert sequence. /FL=gb:NM_010021.1 gb:U46694.1 gb:U38690.1
1426547_at	56.3	P	0.00073	-2.6	-6.06	D	0.99993	7e-05	gb:AI195150 /DB_XREF=gi:3747756 /DB_XREF=ui61c05.x1 /CLONE=IMAGE:1886888 /FEA=FLmRNA /CNT=218 /TID=Mm.196595.1 /TIER=Stack /STK=22 /UG=Mm.196595 /LL=14473 /UG_GENE=Gc /UG_TITLE=group specific component /FL=gb:BC010762.1
1452986_at	31.1	A	0.66553	-2.6	-6.06	D	0.99973	0.00027	gb:AK002584.1 /DB_XREF=gi:12832674 /FEA=mRNA /CNT=57 /TID=Mm.157442.1 /TIER=Stack /STK=15 /UG=Mm.157442 /UG_TITLE=Mus musculus adult male kidney cDNA, RIKEN full-length enriched library, clone:0610012C11:homogentisate 1, 2-dioxygenase, full insert sequence /DEF=Mus musculus adult male kidney cDNA, RIKEN full-length enriched library, clone:0610012C11:homogentisate 1, 2-dioxygenase, full insert seq…
1416676_at	52	P	0.04614	-2.7	-6.5	D	0.99998	2e-05	gb:NM_023125.1 /DB_XREF=gi:12963496 /GEN=Kng /FEA=FLmRNA /CNT=247 /TID=Mm.2160.1 /TIER=FL+Stack /STK=74 /UG=Mm.2160 /LL=16644 /DEF=Mus musculus kininogen (Kng), mRNA. /PROD=kininogen /FL=gb:BC018158.1 gb:NM_023125.1
1417835_at	26.7	A	0.14966	-2.7	-6.5	D	0.99965	0.00035	gb:NM_008645.1 /DB_XREF=gi:6678963 /GEN=Mug1 /FEA=FLmRNA /CNT=127 /TID=Mm.1311.1 /TIER=FL+Stack /STK=35 /UG=Mm.1311 /LL=17836 /DEF=Mus musculus murinoglobulin 1 (Mug1), mRNA. /PROD=murinoglobulin 1 /FL=gb:NM_008645.1 gb:M65736.1
1418653_at	118	P	0.00415	-2.7	-6.5	D	0.99996	4e-05	gb:NM_134144.1 /DB_XREF=gi:19527381 /GEN=AI266900 /FEA=FLmRNA /CNT=64 /TID=Mm.38963.1 /TIER=FL+Stack /STK=20 /UG=Mm.38963 /LL=107141 /DEF=Mus musculus expressed sequence AI266900 (AI266900), mRNA. /PROD=expressed sequence AI266900 /FL=gb:NM_134144.1 gb:BC011222.1
1420465_s_at	2689.3	P	0.01416	-2.7	-6.5	D	0.99998	2e-05	gb:NM_031188.1 /DB_XREF=gi:13654244 /GEN=Mup1 /FEA=FLmRNA /CNT=47 /TID=Mm.157893.1 /TIER=FL /STK=5 /UG=Mm.157893 /LL=17840 /DEF=Mus musculus major urinary protein 1 (Mup1), mRNA. /PROD=major urinary protein 1 /FL=gb:M16355.1 gb:BC012221.1 gb:BC012259.1 gb:BC013649.1 gb:NM_031188.1
1455201_x_at	81.2	A	0.19458	-2.7	-6.5	D	0.99998	2e-05	gb:AI194999 /DB_XREF=gi:3747605 /DB_XREF=ui59d01.x1 /CLONE=IMAGE:1886689 /FEA=EST /CNT=21 /TID=Mm.26743.3 /TIER=Stack /STK=21 /UG=Mm.26743 /LL=11806 /UG_GENE=Apoa1 /UG_TITLE=apolipoprotein A-I
1417061_at	309.9	P	0.01074	-2.8	-6.96	D	0.99998	2e-05	gb:BC003438.1 /DB_XREF=gi:13097389 /FEA=FLmRNA /CNT=139 /TID=Mm.28756.1 /TIER=FL+Stack /STK=58 /UG=Mm.28756 /LL=53945 /UG_GENE=Slc39a1 /DEF=Mus musculus, solute carrier family 39 (iron-regulated transporter), member 1, clone MGC:6489 IMAGE:2647365, mRNA, complete cds. /PROD=solute carrier family 39 (iron-regulatedtransporter), member 1 /FL=gb:BC003438.1 gb:AF226613.1 gb:NM_016917.1 gb:AF215637.1 …
1448852_at	91.6	A	0.06763	-2.8	-6.96	D	0.99995	5e-05	gb:NM_009060.1 /DB_XREF=gi:6677738 /GEN=Rgn /FEA=FLmRNA /CNT=97 /TID=Mm.2118.1 /TIER=FL+Stack /STK=35 /UG=Mm.2118 /LL=19733 /DEF=Mus musculus regucalcin (Rgn), mRNA. /PROD=regucalcin /FL=gb:D86217.1 gb:NM_009060.1 gb:U28937.1 gb:BC012710.1
1451513_x_at	133.6	A	0.21948	-2.8	-6.96	D	0.99998	2e-05	gb:BC012874.1 /DB_XREF=gi:15277552 /FEA=FLmRNA /CNT=20 /TID=Mm.193418.2 /TIER=FL+Stack /STK=13 /UG=Mm.193418 /LL=20701 /UG_GENE=Spi1-2 /DEF=Mus musculus, Similar to serine protease inhibitor 1-2, clone MGC:18593 IMAGE:4194027, mRNA, complete cds. /PROD=Similar to serine protease inhibitor 1-2 /FL=gb:BC012874.1
1454608_x_at	744.6	P	0.00024	-2.8	-6.96	D	0.99998	2e-05	gb:BG141874 /DB_XREF=gi:12645269 /DB_XREF=ia95f03.x1 /CLONE=IMAGE:5646100 /FEA=EST /CNT=189 /TID=Mm.2108.3 /TIER=Stack /STK=163 /UG=Mm.2108 /LL=22139 /UG_GENE=Ttr /UG_TITLE=transthyretin
1418239_at	28.1	A	0.5	-2.9	-7.46	D	0.99961	0.00039	gb:NM_133997.1 /DB_XREF=gi:19527215 /GEN=AI255964 /FEA=FLmRNA /CNT=76 /TID=Mm.26513.1 /TIER=FL+Stack /STK=27 /UG=Mm.26513 /LL=103161 /DEF=Mus musculus expressed sequence AI255964 (AI255964), mRNA. /PROD=expressed sequence AI255964 /FL=gb:BC024769.1 gb:BC022795.1 gb:NM_133997.1 gb:BC010815.1 gb:BC025827.1
1419093_at	8.5	A	0.16553	-2.9	-7.46	D	0.99969	0.00031	gb:BC018390.1 /DB_XREF=gi:17390919 /FEA=FLmRNA /CNT=111 /TID=Mm.21545.1 /TIER=FL+Stack /STK=13 /UG=Mm.21545 /LL=56720 /UG_GENE=Tdo2 /DEF=Mus musculus, tryptophan 2,3-dioxygenase, clone MGC:25811 IMAGE:4159877, mRNA, complete cds. /PROD=tryptophan 2,3-dioxygenase /FL=gb:NM_019911.1 gb:BC018390.1 gb:U24493.1
1436615_a_at	26.2	P	0.04614	-2.9	-7.46	D	0.99991	9e-05	gb:AI786408 /DB_XREF=gi:5334124 /DB_XREF=uj55b02.x1 /CLONE=IMAGE:1923819 /FEA=EST /CNT=10 /TID=Mm.2611.3 /TIER=Stack /STK=8 /UG=Mm.2611 /LL=18416 /UG_GENE=Otc /UG_TITLE=ornithine transcarbamylase
1455913_x_at	395.1	P	0.00024	-2.9	-7.46	D	0.99998	2e-05	gb:AV152953 /DB_XREF=gi:5358159 /DB_XREF=AV152953 /CLONE=2900051A13 /FEA=EST /CNT=45 /TID=Mm.2108.4 /TIER=Stack /STK=26 /UG=Mm.2108 /LL=22139 /UG_GENE=Ttr /UG_TITLE=transthyretin
1419094_at	44.1	P	0.00293	-3	-8	D	0.99998	2e-05	gb:NM_010001.1 /DB_XREF=gi:6753579 /GEN=Cyp2c37 /FEA=FLmRNA /CNT=62 /TID=Mm.220317.1 /TIER=FL+Stack /STK=13 /UG=Mm.220317 /LL=13096 /DEF=Mus musculus cytochrome P450, 2c37 (Cyp2c37), mRNA. /PROD=cytochrome P450, 2c37 /FL=gb:NM_010001.1 gb:AF047542.1
1420553_x_at	100.4	P	0.00195	-3	-8	D	0.99997	3e-05	gb:NM_009243.1 /DB_XREF=gi:6678078 /GEN=Spi1-1 /FEA=FLmRNA /CNT=10 /TID=Mm.218230.1 /TIER=FL /STK=4 /UG=Mm.218230 /LL=20700 /DEF=Mus musculus serine protease inhibitor 1-1 (Spi1-1), mRNA. /PROD=serine protease inhibitor 1-1 /FL=gb:M75721.1 gb:NM_009243.1
1424451_at	121.8	P	0.00806	-3	-8	D	0.99998	2e-05	gb:BC019882.1 /DB_XREF=gi:18043768 /FEA=FLmRNA /CNT=83 /TID=Mm.205266.2 /TIER=FL+Stack /STK=31 /UG=Mm.205266 /LL=113868 /UG_GENE=Acaa /DEF=Mus musculus, Similar to Acetyl-CoA acyltransferase, 3-oxo acyl-CoA thiolase A, peroxisomal, clone MGC:29978 IMAGE:5123887, mRNA, complete cds. /PROD=Similar to Acetyl-CoA acyltransferase, 3-oxoacyl-CoA thiolase A, peroxisomal /FL=gb:BC019882.1
1451600_s_at	41.3	P	0.04614	-3	-8	D	0.99998	2e-05	gb:BC019147.1 /DB_XREF=gi:17512360 /FEA=FLmRNA /CNT=31 /TID=Mm.207084.1 /TIER=FL /STK=5 /UG=Mm.207084 /DEF=Mus musculus, clone MGC:29382 IMAGE:5052937, mRNA, complete cds. /PROD=Unknown (protein for MGC:29382) /FL=gb:BC019147.1
1455093_a_at	49	A	0.14966	-3	-8	D	0.99983	0.00017	gb:AI256465 /DB_XREF=gi:3863990 /DB_XREF=ui86f08.x1 /CLONE=IMAGE:1889319 /FEA=EST /CNT=49 /TID=Mm.197554.2 /TIER=Stack /STK=25 /UG=Mm.197554 /LL=11625 /UG_GENE=Ahsg /UG_TITLE=alpha-2-HS-glycoprotein
1438840_x_at	124.3	P	0.00415	-3.1	-8.57	D	0.99998	2e-05	gb:AI527359 /DB_XREF=gi:4441494 /DB_XREF=uj51c05.x1 /CLONE=IMAGE:1923464 /FEA=EST /CNT=10 /TID=Mm.26743.6 /TIER=Stack /STK=9 /UG=Mm.26743 /LL=11806 /UG_GENE=Apoa1 /UG_TITLE=apolipoprotein A-I
1448854_s_at	35.4	A	0.75391	-3.1	-8.57	D	0.99997	4e-05	gb:NM_008645.1 /DB_XREF=gi:6678963 /GEN=Mug1 /FEA=FLmRNA /CNT=127 /TID=Mm.1311.1 /TIER=FL+Stack /STK=35 /UG=Mm.1311 /LL=17836 /DEF=Mus musculus murinoglobulin 1 (Mug1), mRNA. /PROD=murinoglobulin 1 /FL=gb:NM_008645.1 gb:M65736.1
1418282_x_at	139.3	M	0.05615	-3.2	-9.19	D	0.99989	0.00011	gb:NM_009244.1 /DB_XREF=gi:6678080 /GEN=Spi1-2 /FEA=FLmRNA /CNT=114 /TID=Mm.193418.1 /TIER=FL+Stack /STK=26 /UG=Mm.193418 /LL=20701 /DEF=Mus musculus serine protease inhibitor 1-2 (Spi1-2), mRNA. /PROD=serine protease inhibitor 1-2 /FL=gb:M25529.1 gb:NM_009244.1
1438390_s_at	305.4	A	0.14966	-3.4	-10.56	D	0.99998	2e-05	gb:AV105428 /DB_XREF=gi:5252976 /DB_XREF=AV105428 /CLONE=2510016C06 /FEA=EST /CNT=11 /TID=Mm.6856.3 /TIER=Stack /STK=11 /UG=Mm.6856 /LL=30939 /UG_GENE=Pttg1 /UG_TITLE=pituitary tumor-transforming 1
1419232_a_at	56.8	A	0.60107	-3.5	-11.31	D	0.99973	0.00027	gb:NM_009692.1 /DB_XREF=gi:6753095 /GEN=Apoa1 /FEA=FLmRNA /CNT=13 /TID=Mm.26743.1 /TIER=FL+Stack /STK=12 /UG=Mm.26743 /LL=11806 /DEF=Mus musculus apolipoprotein A-I (Apoa1), mRNA. /PROD=apolipoprotein A-I /FL=gb:BC012253.1 gb:NM_009692.1
1421001_a_at	188	P	0.00415	-3.5	-11.31	D	0.99981	0.00019	gb:NM_009802.1 /DB_XREF=gi:6753269 /GEN=Car6 /FEA=FLmRNA /CNT=25 /TID=Mm.20289.1 /TIER=FL /STK=2 /UG=Mm.20289 /LL=12353 /DEF=Mus musculus carbonic anhydrase 6 (Car6), mRNA. /PROD=carbonic anhydrase 6 /FL=gb:AF079834.1 gb:NM_009802.1
1427957_at	5.7	A	0.63379	-3.5	-11.31	D	0.99969	0.00031	gb:AI256077 /DB_XREF=gi:3863602 /DB_XREF=ui94g09.x1 /CLONE=IMAGE:1890112 /FEA=mRNA /CNT=41 /TID=Mm.25195.1 /TIER=Stack /STK=11 /UG=Mm.25195 /UG_TITLE=Mus musculus, clone MGC:29256 IMAGE:5055136, mRNA, complete cds
1416809_at	157	P	0.00024	-3.6	-12.13	D	0.99998	2e-05	gb:BC010528.1 /DB_XREF=gi:14714762 /FEA=FLmRNA /CNT=276 /TID=Mm.21193.1 /TIER=FL+Stack /STK=68 /UG=Mm.21193 /LL=13112 /UG_GENE=Cyp3a11 /DEF=Mus musculus, cytochrome P450, steroid inducible 3a11, clone MGC:18636 IMAGE:4194909, mRNA, complete cds. /PROD=cytochrome P450, steroid inducible 3a11 /FL=gb:NM_007818.1 gb:BC010528.1
1424063_at	370.1	P	0.00073	-3.6	-12.13	D	0.99969	0.00031	gb:BC016132.1 /DB_XREF=gi:16359351 /FEA=FLmRNA /CNT=88 /TID=Mm.8025.1 /TIER=FL+Stack /STK=57 /UG=Mm.8025 /LL=11354 /UG_GENE=Abpa /DEF=Mus musculus, clone MGC:28914 IMAGE:4922791, mRNA, complete cds. /PROD=Unknown (protein for MGC:28914) /FL=gb:BC016132.1
1456106_x_at	11.2	A	0.63379	-3.6	-12.13	D	0.99914	0.00087	gb:BB343189 /DB_XREF=gi:9052905 /DB_XREF=BB343189 /CLONE=B930042O12 /FEA=EST /CNT=16 /TID=Mm.21406.3 /TIER=Stack /STK=16 /UG=Mm.21406 /LL=68112 /UG_GENE=C330016H24Rik /UG_TITLE=RIKEN cDNA C330016H24 gene
1424973_at	16.7	A	0.11157	-3.7	-13	D	0.9999	0.0001	gb:AF204959.1 /DB_XREF=gi:6525046 /GEN=CYP3A25 /FEA=FLmRNA /CNT=21 /TID=Mm.26993.1 /TIER=FL+Stack /STK=10 /UG=Mm.26993 /LL=56388 /DEF=Mus musculus cytochrome P450 3A25 (CYP3A25) mRNA, complete cds. /PROD=cytochrome P450 3A25 /FL=gb:AF204959.1
1417618_at	10.6	A	0.63379	-3.8	-13.93	D	0.99989	0.00011	gb:NM_010582.1 /DB_XREF=gi:6754383 /GEN=Itih2 /FEA=FLmRNA /CNT=89 /TID=Mm.182043.1 /TIER=FL+Stack /STK=40 /UG=Mm.182043 /LL=16425 /DEF=Mus musculus inter-alpha trypsin inhibitor, heavy chain 2 (Itih2), mRNA. /PROD=inter-alpha trypsin inhibitor, heavy chain 2 /FL=gb:NM_010582.1
1418113_at	10.1	A	0.43237	-3.8	-13.93	D	0.99985	0.00015	gb:BC010989.1 /DB_XREF=gi:15012160 /FEA=FLmRNA /CNT=128 /TID=Mm.174372.1 /TIER=FL+Stack /STK=29 /UG=Mm.174372 /LL=13101 /UG_GENE=Cyp2d10 /DEF=Mus musculus, cytochrome P450, 2d10, clone MGC:14081 IMAGE:4193743, mRNA, complete cds. /PROD=cytochrome P450, 2d10 /FL=gb:BC010989.1 gb:M27167.1 gb:NM_010005.1
1419620_at	19.7	A	0.46606	-3.8	-13.93	D	0.99997	4e-05	gb:NM_013917.1 /DB_XREF=gi:7305426 /GEN=Pttg1 /FEA=FLmRNA /CNT=15 /TID=Mm.6856.1 /TIER=FL+Stack /STK=8 /UG=Mm.6856 /LL=30939 /DEF=Mus musculus pituitary tumor-transforming 1 (Pttg1), mRNA. /PROD=pituitary tumor-transforming 1 /FL=gb:AF071209.1 gb:NM_013917.1
1423029_at	2.3	A	0.85034	-3.8	-13.93	D	0.99923	0.00077	gb:NM_008236.1 /DB_XREF=gi:6680206 /GEN=Hes2 /FEA=FLmRNA /CNT=2 /TID=Mm.57038.1 /TIER=FL /STK=0 /UG=Mm.57038 /LL=15206 /DEF=Mus musculus hairy and enhancer of split 2 (Drosophila) (Hes2), mRNA. /PROD=hairy and enhancer of split 2 (Drosophila) /FL=gb:NM_008236.1
1423257_at	18	A	0.39893	-3.8	-13.93	D	0.99979	0.00021	gb:AI327006 /DB_XREF=gi:4061435 /DB_XREF=mj90a07.x1 /CLONE=IMAGE:483348 /FEA=FLmRNA /CNT=62 /TID=Mm.7459.1 /TIER=Stack /STK=22 /UG=Mm.7459 /LL=13119 /UG_GENE=Cyp4a14 /UG_TITLE=cytochrome P450, 4a14 /FL=gb:NM_007822.1
1424105_a_at	121.3	A	0.12964	-3.8	-13.93	D	0.99997	3e-05	gb:AF069051.1 /DB_XREF=gi:3702843 /GEN=PTTG /FEA=FLmRNA /CNT=92 /TID=Mm.6856.2 /TIER=FL+Stack /STK=53 /UG=Mm.6856 /LL=30939 /DEF=Mus musculus pituitary tumor transforming gene protein (PTTG) mRNA, complete cds. /PROD=pituitary tumor transforming gene protein /FL=gb:AF069051.1
1425032_at	161.7	P	0.00806	-3.8	-13.93	D	0.99998	2e-05	gb:BC024677.1 /DB_XREF=gi:19353043 /FEA=FLmRNA /CNT=15 /TID=Mm.110829.1 /TIER=FL+Stack /STK=8 /UG=Mm.110829 /DEF=Mus musculus, clone MGC:19070 IMAGE:4193111, mRNA, complete cds. /PROD=Unknown (protein for MGC:19070) /FL=gb:BC024677.1
1448168_a_at	798.5	P	0.00024	-3.8	-13.93	D	0.99998	2e-05	gb:NM_009267.1 /DB_XREF=gi:6678120 /GEN=Spt1 /FEA=FLmRNA /CNT=372 /TID=Mm.1280.1 /TIER=FL+Stack /STK=149 /UG=Mm.1280 /LL=20770 /DEF=Mus musculus salivary protein 1 (Spt1), mRNA. /PROD=salivary protein 1 /FL=gb:M33974.1 gb:NM_009267.1
1449587_a_at	232.5	P	0.00024	-3.8	-13.93	D	0.99998	2e-05	gb:NM_008644.1 /DB_XREF=gi:6678961 /GEN=Muc10 /FEA=FLmRNA /CNT=18 /TID=Mm.200411.1 /TIER=FL /STK=6 /UG=Mm.200411 /LL=17830 /DEF=Mus musculus mucin 10, submandibular gland salivary mucin (Muc10), mRNA. /PROD=mucin 10, submandibular gland salivary mucin /FL=gb:NM_008644.1 gb:U37531.1
1449212_at	60.7	P	0.00806	-3.9	-14.93	D	0.99998	2e-05	gb:NM_008843.1 /DB_XREF=gi:6679326 /GEN=Pip /FEA=FLmRNA /CNT=38 /TID=Mm.1278.1 /TIER=FL+Stack /STK=18 /UG=Mm.1278 /LL=18716 /DEF=Mus musculus prolactin induced protein (Pip), mRNA. /PROD=prolactin induced protein /FL=gb:AB017907.1 gb:NM_008843.1
1421669_at	3.3	A	0.53394	-4.1	-17.15	D	0.99991	9e-05	gb:NM_020565.1 /DB_XREF=gi:10181193 /GEN=Sult-x2 /FEA=FLmRNA /CNT=3 /TID=Mm.6590.1 /TIER=FL /STK=2 /UG=Mm.6590 /LL=57430 /DEF=Mus musculus sulfotransferase-related protein SULT-X2 (Sult-x2), mRNA. /PROD=sulfotransferase-related protein SULT-X2 /FL=gb:AF026075.1 gb:NM_020565.1
1424485_at	8.4	A	0.80542	-4.1	-17.15	D	0.99989	0.00011	gb:BC019491.1 /DB_XREF=gi:18044500 /FEA=FLmRNA /CNT=73 /TID=Mm.28341.1 /TIER=FL+Stack /STK=29 /UG=Mm.28341 /LL=30924 /UG_GENE=Angptl3 /DEF=Mus musculus, angiopoietin-like 3, clone MGC:28584 IMAGE:4211688, mRNA, complete cds. /PROD=angiopoietin-like 3 /FL=gb:AF162224.1 gb:BC019491.1
1423866_at	51	P	0.04614	-4.2	-18.38	D	0.99998	2e-05	gb:BC016407.1 /DB_XREF=gi:16741102 /FEA=FLmRNA /CNT=258 /TID=Mm.196242.1 /TIER=FL+Stack /STK=87 /UG=Mm.196242 /LL=20714 /UG_GENE=Spi2 /DEF=Mus musculus, clone MGC:25414 IMAGE:4210846, mRNA, complete cds. /PROD=Unknown (protein for MGC:25414) /FL=gb:BC019802.1 gb:BC016407.1 gb:BC011217.1
1455232_at	3.1	A	0.60107	-4.3	-19.7	D	0.99985	0.00015	gb:BB745660 /DB_XREF=gi:16148599 /DB_XREF=BB745660 /CLONE=F530009J21 /FEA=EST /CNT=23 /TID=Mm.24454.2 /TIER=Stack /STK=19 /UG=Mm.24454 /LL=75541 /UG_GENE=1700019G17Rik /UG_TITLE=RIKEN cDNA 1700019G17 gene
1416444_at	4.3	A	0.21948	-4.5	-22.63	D	0.99945	0.00055	gb:NM_019423.1 /DB_XREF=gi:9507146 /GEN=Elovl2 /FEA=FLmRNA /CNT=140 /TID=Mm.2567.1 /TIER=FL+Stack /STK=89 /UG=Mm.2567 /LL=54326 /DEF=Mus musculus elongation of very long chain fatty acids (FEN1Elo2, SUR4Elo3, yeast)-like 2 (Elovl2), mRNA. /PROD=sequence similarity to Cig30 2 /FL=gb:NM_019423.1 gb:AF170908.1
1427629_at	1.2	A	0.80542	-4.5	-22.63	D	0.99961	0.00039	gb:D83204.1 /DB_XREF=gi:4092840 /FEA=mRNA /CNT=3 /TID=Mm.5046.3 /TIER=ConsEnd /STK=0 /UG=Mm.5046 /LL=19271 /UG_GENE=Ptprj /UG_TITLE=protein tyrosine phosphatase, receptor type, J /DEF=Mus musculus mRNA, one isoform of PTP-RL9.
1419704_at	60.8	P	0.00806	-4.6	-24.25	D	0.99998	2e-05	gb:NM_017396.1 /DB_XREF=gi:8393234 /GEN=Cyp3a41 /FEA=FLmRNA /CNT=23 /TID=Mm.133179.1 /TIER=FL /STK=7 /UG=Mm.133179 /LL=53973 /DEF=Mus musculus cytochrome P450, steroid inducible 3a41 (Cyp3a41), mRNA. /PROD=cytochrome P450, steroid inducible 3a41 /FL=gb:NM_017396.1 gb:AB033414.1
1423437_at	4	A	0.53394	-4.7	-25.99	D	0.99991	9e-05	gb:AI172943 /DB_XREF=gi:3720523 /DB_XREF=ud62f01.x1 /CLONE=IMAGE:1450489 /FEA=FLmRNA /CNT=121 /TID=Mm.14719.1 /TIER=ConsEnd /STK=2 /UG=Mm.14719 /LL=14859 /UG_GENE=Gsta3 /UG_TITLE=glutathione S-transferase, alpha 3 /FL=gb:BC009805.1 gb:NM_010356.1 gb:M73483.1
1439408_a_at	3.1	A	0.46606	-4.7	-25.99	D	0.99998	2e-05	gb:AV100992 /DB_XREF=gi:5248540 /DB_XREF=AV100992 /CLONE=2410070E19 /FEA=EST /CNT=8 /TID=Mm.12926.4 /TIER=Stack /STK=8 /UG=Mm.12926 /LL=19014 /UG_GENE=Pparbp /UG_TITLE=peroxisome proliferator activated receptor binding protein
1419233_x_at	13.5	A	0.93237	-4.9	-29.86	D	0.99998	2e-05	gb:NM_009692.1 /DB_XREF=gi:6753095 /GEN=Apoa1 /FEA=FLmRNA /CNT=13 /TID=Mm.26743.1 /TIER=FL+Stack /STK=12 /UG=Mm.26743 /LL=11806 /DEF=Mus musculus apolipoprotein A-I (Apoa1), mRNA. /PROD=apolipoprotein A-I /FL=gb:BC012253.1 gb:NM_009692.1
1431702_at	1.9	A	0.56763	-4.9	-29.86	D	0.99995	5e-05	gb:AK014974.1 /DB_XREF=gi:12853121 /FEA=mRNA /CNT=2 /TID=Mm.46662.2 /TIER=ConsEnd /STK=0 /UG=Mm.46662 /LL=59036 /UG_GENE=Thyex3-pending /UG_TITLE=thymus expressed gene 3 /DEF=Mus musculus adult male testis cDNA, RIKEN full-length enriched library, clone:4921528D17:similar to THYMUS-EXPRESSED NOVEL GENE-3 PROTEIN, full insert sequence.
1448723_at	8.5	A	0.66553	-5.3	-39.4	D	0.99985	0.00015	gb:NM_017473.1 /DB_XREF=gi:8567341 /GEN=Rdh7 /FEA=FLmRNA /CNT=108 /TID=Mm.6696.1 /TIER=FL+Stack /STK=44 /UG=Mm.6696 /LL=54150 /DEF=Mus musculus retinol dehydrogenase 7 (Rdh7), mRNA. /PROD=retinol dehydrogenase 7 /FL=gb:BC024603.1 gb:AB032058.1 gb:AB015165.1 gb:NM_017473.1 gb:AF056194.1
1419622_at	1.3	A	0.93237	-5.4	-42.22	D	0.9999	0.0001	gb:NM_009467.1 /DB_XREF=gi:6678500 /GEN=Ugt2b5 /FEA=FLmRNA /CNT=11 /TID=Mm.29157.1 /TIER=FL+Stack /STK=8 /UG=Mm.29157 /LL=22238 /DEF=Mus musculus UDP-glucuronosyltransferase 2 family, member 5 (Ugt2b5), mRNA. /PROD=UDP-glucuronosyltransferase 2 family, member 5 /FL=gb:NM_009467.1
